# Supplementary material
Source: PubMed Central journal article supplement (PMC3374335)
Supplement: NIHMS383213-supplement-Supplementary_figures.pdf [file NIHMS383213-supplement-Supplementary_figures.pdf]

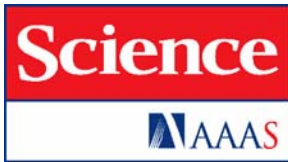

## Supporting Online Material for

### **Mutational Inactivation of *STAG2* Causes Aneuploidy in Human Cancer**

David A. Solomon, Taeyeon Kim, Laura A. Diaz-Martinez, Joshlean Fair, Abdel G. Elkahloun, Brent T. Harris, Jeffrey Toretsky, Steven A. Rosenberg, Neerav Shukla, Marc Ladanyi, Yardena Samuels, C. David James, Hongtao Yu, Jung-Sik Kim, Todd Waldman\*

\*To whom correspondence should be addressed. E-mail: waldmant@georgetown.edu

Published 19 August 2011, *Science* **333**, 1039 (2011)  
DOI: 10.1126/science.1203619

#### **This PDF file includes**

Materials and Methods  
Figs. S1 to S31  
Tables S1 to S6  
References

## Materials and Methods

**Tumor tissues.** A panel of 21 glioblastoma cell lines was obtained from the American Type Culture Collection (U87MG, U138MG, M059J, Hs683, H4, A172, LN18, LN229, CCF-STTG1, T98G, DBTRG-05MG), DSMZ (8MGBA, 42MGBA, DKMG, GAMG, GMS10, LN405, SNB19), and the Japan Health Sciences Foundation Health Science Research Resources Bank (AM38, NMC-G1, KG-1-C). Normal human astrocytes (NHAs) were obtained from Clonetics and AllCells. A panel of 20 subcutaneous xenografts in immunodeficient mice was generated directly from primary glioblastoma surgical specimens at the Mayo Clinic and the University of California San Francisco Brain Tumor Research Center. Generation and characterization of these primary xenografts has been previously described (1,2,3). A panel of 48 snap-frozen primary glioblastoma tumors and paired blood samples was obtained from the Brain Tumour Tissue Bank (London Health Sciences Centre, Ontario, Canada) funded by the Brain Tumour Foundation of Canada. A panel of 48 malignant melanomas and paired blood samples was obtained from patients undergoing resection at the National Cancer Institute. Melanoma primary cultures were generated from these surgical specimens by mechanical or enzymatic dispersion of tumor cells followed by expansion for 5-15 passages, and have been previously described (4). A panel of 24 Ewing's sarcoma tumors and paired normal tissue was obtained from patients undergoing resection at the Memorial Sloan-Kettering Cancer Center. In each case, tumor pathology has been confirmed by PCR-based identification of either EWS-FLI1 or EWS-ERG fusion transcripts (5). Genomic DNA was isolated from tumor cells/tissues and peripheral blood mononuclear cells using standard proteinase K digestion, phenol-chloroform

extraction, and ethanol precipitation or using the DNeasy Blood & Tissue kit (Qiagen). Matching between blood and tumor DNA was verified by direct sequencing of 26 single nucleotide polymorphisms at 24 loci.

**Copy number arrays.** Genomic DNA derived from 21 glioblastoma cell lines was interrogated with Affymetrix 250K Nsp I Human GeneChip Arrays. The scanned array images and processed data sets have been deposited in the Gene Expression Omnibus (<http://www.ncbi.nlm.nih.gov/geo>, dataset GSE13021), and the analysis of this data has been previously described (6,7,8).

**Western blot.** Primary antibodies used were STAG2 clone J-12 (Santa Cruz Biotechnology, sc-81852),  $\alpha$ -tubulin Ab-2 clone DM1A (Neomarkers), STAG1 clone LL-16 (Santa Cruz Biotechnology, sc-81851), SGOL1 clone 3C11 (Novus Biologicals, H00151648), RASSF1A clone 3F3 (Santa Cruz Biotechnology, sc-58470), and GFP clone B-2 (Santa Cruz Biotechnology, sc-9996). Protein was isolated from 156 human cancer cell lines in RIPA buffer, resolved by SDS-PAGE, and immunoblotted following standard biochemical techniques. Cells were cultured in 10  $\mu$ M 5-aza-2-deoxycytidine (Sigma) for 96 hours and harvested in RIPA buffer.

**DNA and mRNA sequencing.** Individual exons of STAG2 were PCR amplified from genomic DNA using conditions and primer pairs described by Sjoblom *et al.* (9). Total RNA was purified from cultured cells using TRIZOL (Invitrogen). RT-PCR was performed using the Superscript III Platinum One-Step RT-PCR System (Invitrogen). PCR products were purified using the Exo/SAP method followed by a Sephadex spin column. Sequencing reactions were performed using Big Dye v3.1 (Applied Biosystems)

using an M13F primer, and analyzed on an Applied Biosystems 3730XL capillary sequencer. Sequences were analyzed using Mutation Surveyor (Softgenetics). Traces with putative mutations were re-amplified and sequenced from both tumor and matched normal DNA from blood when available. All primer sequences are available upon request.

**Generation of GFP-STAG2.** A full-length wild-type human STAG2 cDNA (provided by Jan-Michael Peters) was excised from pFastBac1 with Sall + XhoI and cloned in-frame into the XhoI site of the pEGFP-C3 vector (Clontech), thereby resulting in fusion of GFP to the N-terminus of STAG2. Tumor-derived mutations were introduced into the pEGFP-STAG2 expression vector by site-directed mutagenesis (Stratagene) and confirmed by DNA sequencing.

**Immunohistochemistry.** To verify the specificity of a STAG2 antibody for immunohistochemistry (IHC), STAG2-deficient H4 cells and a STAG2-corrected H4 clone were immersed in Histogel, embedded in paraffin, and then sectioned. IHC was performed on these sections following a standard protocol using STAG2 clone J-12 mouse monoclonal antibody (Santa Cruz Biotechnology). Two consecutive sections from glioblastoma (GL806), lymphoma (LY1501), melanoma (ME1002), medulloblastoma (BC17012), and colorectal adenocarcinoma (CO1922) tissue microarrays were obtained from U.S. Biomax. The glioblastoma arrays contained 35 cases spotted in duplicate. The lymphoma array contained 43 cases of B-cell lymphoma, 17 T-cell lymphoma, 1 Lennert lymphoma, 4 non-Hodgkin's lymphoma, and 5 Hodgkin's lymphoma, and 5 normal lymph node tissue cores all spotted in duplicate. The melanoma array contained 45 cases of malignant melanoma and 5 normal dermis



tissue cores all spotted in duplicate. The medulloblastoma array contained 20 cases spotted in triplicate. The colorectal adenocarcinoma array contained 96 cases spotted in duplicate. One Ewing's sarcoma tissue microarray was provided by the Children's Oncology Group and the Cooperative Human Tissue Network of the National Cancer Institute. This array contained 30 cases of Ewing's sarcoma spotted in duplicate and has been previously described (10). A second Ewing's sarcoma tissue microarray generated at Memorial Sloan-Kettering Cancer Center containing 25 cases of primary tumor tissue spotted in multiple replicates that has been previously described was also used (5). IHC was performed with the STAG2 antibody at a 1:50 dilution to determine the fraction of tumors that had lost expression of STAG2. IHC was simultaneously performed on a consecutive slide from each tissue microarray using  $\alpha$ -tubulin Ab-2 clone DM1A mouse monoclonal antibody (Neomarkers) at a 1:500 dilution using an identical procedure and reagents to serve as a positive control, thereby demonstrating that any STAG2-negative cores were accessible to antibody for staining. Cores with poor tissue quality, failure to stain with  $\alpha$ -tubulin antibody, or significant melanin pigment that interfered with interpretation of staining were excluded from the analysis.

**Human somatic cell gene targeting.** Homology arms for creation of STAG2 KI and KO vectors were created by high fidelity PCR from a human BAC template using Phusion DNA Polymerase (New England Biolabs) as described by the manufacturer. All homology arms were ~1 kb in size. For the H4 STAG2 KI vector, the left arm was composed of intron 11/exon 12/intron 12/exon 13/intron 13, and the right arm was composed of intron 13, as defined by ENSEMBL transcript ENST00000218089. For the 42MGBA STAG2 KI vector, the left arm was composed of intron 19/exon 20/intron 21,

and the right arm was composed of intron 21. For the HCT116 STAG2 KO vector, the left arm was composed of intron 2/exon 3/intron 3, and the right arm was composed of intron 3. The PCR products were cloned into pCR-Blunt II-TOPO (Invitrogen) and sequenced. For the HCT116 KO vector, the cloned left homology arm was then mutagenized (Quikchange, Stratagene) to introduce a stop mutation into codon 6. The sequence of all PCR and mutagenesis primers is available upon request. For all three vectors, the PCR product composing the left homology arm was then digested with Age I and Sac I, and the PCR product composing the right homology arm was digested with Eco RI and Sal I. These left and right arms were then gel purified and simultaneously cloned via four-way ligation into the pAAV-SEPT-Acceptor vector (11) that had been digested with Age I, Sac I, Eco RI and Sal I, and then gel purified. Ligation products were then transformed into chemically-competent TOP10 cells (Invitrogen), plasmid DNA was isolated, and correct clones identified by restriction analysis followed by DNA sequencing of all junctions. Next, transient stocks of AAV-2 virions were created by cotransfection of 293T cells with STAG2 KI and KO vectors together with pAAV-RC (Stratagene) and pHELPER (Stratagene) using FUGENE 6 (Roche). Two days after transfection, media was aspirated and cell monolayers were scraped into 1 mL PBS and subjected to four cycles of freeze/thaw (consisting of 10 min freeze in a dry-ice ethanol bath and 10 min thaw in a 37°C water bath, vortexing after each thaw). The lysate was then clarified by centrifugation at 12,000 rpm for 10 min in a benchtop microfuge to remove cell debris, and the virus-containing supernatant was aliquoted and stored at -80°C. 100 µL of virus was then used to infect cells in T25 tissue culture flask, and cells were passaged at limiting dilution into 96-well plates in the presence of G418 one

day after infection. The concentrations of G418 used were as follows: 1.0 mg/mL for H4 and 42MGBA cells and 0.6 mg/mL for HCT116 cells. Individual G418-resistant clones were expanded and used for the preparation of genomic DNA. Clones were tested for homologous integration of the targeting vector using a primer pair specific for the targeted allele. Once homologous recombinant clones were identified in this way, they were infected with a Cre-expressing adenovirus. Individual clones were expanded by limiting dilution and tested for the restoration of G418-sensitivity. STAG2 Western blots were then performed to confirm the restoration of STAG2 expression in H4 and 42MGBA STAG2 KI cells and the loss of STAG2 expression in HCT116 STAG2 KO cells.

**Lentiviral shRNA knockdown.** Five unique short hairpin RNAs (shRNA) to the STAG2 mRNA in the pLKO.1-Puro lentiviral expression vector were obtained from Open Biosystems. To make the virus, empty pLKO.1-Puro or each of these five shRNA clones were cotransfected into 293T cells with pVSV-G (Addgene) and pHR'-CMV $\Delta$ 8.2 (Addgene) helper plasmids using Fugene 6 (Roche). Virus-containing conditioned medium was harvested 48 h after transfection, filtered, and used to infect recipient cells in the presence of 8  $\mu$ g/mL of polybrene. Infected cells were selected with 2 or 10  $\mu$ g/mL of puromycin until all mock-infected cells were dead and then maintained in puromycin.

**Sister chromatid cohesion assay.** Cells were arrested in mitosis by culturing in the presence of 220 nM taxol or 500 nM nocodazole. Chromosome spreads were then performed by subjecting the cells to hypotonic treatment, followed by fixation with Carnoy's fixative, spreading on glass slides, and Giemsa staining as previously

described (12). Micrographs were obtained using a DeltaVision microscope (Applied Precision) fitted with a U-PlanApo 100X Oil Objective, 1.40 NA, 0.12 mm WD (Olympus) and a CoolSnap HQ2 camera (Photometrics). The incubation periods and number of cells counted per experiment are as follows: HCT116 cells and KO derivatives - 6 hours, at least 70 mitotic cells were counted per treated cell line/cell clone; H4 cells and KI derivatives - 10 hours, at least 90 mitotic cells were counted per treated cell line/cell clone; 42MGBA cells and KI derivatives - 18 hours, at least 200 mitotic cells were counted per treated cell line/cell clone; HCT116, CAL-51 and DLD-1 cells and lenti-shRNA derivatives - 6 hours, at least 200 mitotic cells were counted per cell line.

**Expression microarrays.** Total RNA was purified from asynchronously proliferating STAG2-proficient and deficient cells using TRIZOL (Invitrogen) according to the manufacturer's instructions. RNA was further purified using the RNeasy MinElute Cleanup kit (Qiagen). RNA quality was verified using a Bioanalyzer (Agilent) and concentration was measured using a NanoDrop (Thermo Scientific). 300 ng of total RNA was used for labeling. The hybridization cocktail containing the fragmented and labeled cDNAs were hybridized to Affymetrix Human GeneChip 1.0 ST microarrays. The microarrays were washed and stained in an Affymetrix Fluidics Station using standard Affymetrix protocols. The probe arrays were stained with streptavidin-phycoerythrin solution (Molecular Probes) and enhanced using an antibody solution containing 0.5 mg/mL of biotinylated anti-streptavidin (Vector Laboratories). An Affymetrix Gene Chip Scanner 3000 was used to scan the probe arrays. Gene expression intensities were calculated using GeneChip Command Console Software (AGCC). .cel files generated by the Affymetrix AGCC program were imported in the

Affymetrix Expression Console software and RMA (Robust Multichip Analysis) normalization was performed to generate the .chp files. The .chp files were normalized, log<sub>2</sub> transformed, and summarized. Pairwise comparisons within GeneSifter software (VizX Labs) were performed on the .chp files, and t-test comparison and Benjamin and Hochberg correction were applied. The scanned array images and processed data sets have been deposited in the Gene Expression Omnibus (<http://www.ncbi.nlm.nih.gov/geo>, dataset GSE28214)

**Flow cytometry.** Asynchronously proliferating cells were trypsinized and collected by centrifugation. Cells were resuspended in PBS and fixed in cold ethanol to a final concentration of 75% ethanol. Cells were then stained with 3  $\mu$ M propidium iodide for 2 hours and analyzed by flow cytometry in a BD FACSort instrument using FCS Express v.3 software (DeNovo Software).

**Fluorescent microscopy.** Cells were grown on glass coverslips coated with poly-L-lysine (Sigma). The pEGFP-Histone H2B expression vector has been previously described (13). pEGFP-STAG2 and pEGFP-Histone H2B were transfected into cells using Fugene 6 (Roche). Cells were fixed in 4% formaldehyde and stained with Hoechst 33342 (Molecular Probes) before mounting on slides. As indicated, extraction of soluble proteins was performed using 0.1% Triton X-100 in PBS for 5 min on ice prior to formaldehyde fixation. Imaging was performed on an Olympus IX71 epifluorescent microscope with Olympus PlanApo objectives and Olympus DP70 CCD camera.

**Karyotyping.** Cultured cells were treated with 0.02  $\mu$ g/ml colcemid for 55 minutes at 37°C. The cells were then trypsinized, centrifuged for 7 minutes at 200 x g, and the cell

pellet resuspended in warmed hypotonic solution and incubated at 37°C for 11 minutes. The swollen cells were then centrifuged and the pellet resuspended in 8 mL of Carnoy's fixative (3:1 methanol:glacial acetic acid). After incubation in fixative at room temperature for 96 minutes, the cell suspension was centrifuged and washed twice in Carnoy's fixative. After the last centrifugation, the cells were resuspended in 1 to 3 mL of freshly prepared fixative to produce an opalescent cell suspension. Drops of the final cell suspension were placed on clean slides and air-dried. Slides were stained with a 1:3 mixture of Wright's stain and 0.06 M phosphate buffer for 4-10 minutes, washed with tap water for 5 seconds, and then air-dried. One hundred cells in metaphase were examined for chromosome count.

**Statistical analysis.** Statistical analysis was performed using GraphPad Prism software. Two-tailed unpaired t-tests were performed for comparison of means analysis.

## Supplementary Figure and Table Legends

**Supplementary Figure 1.** PCR confirmation of STAG2 genomic deletion in U138MG glioblastoma cells. PCR for multiple STAG2 exons using genomic DNA from U138MG cells as template resulted in no amplification products, whereas PCR using genomic DNA from A172 and U87MG glioblastoma cells with intact STAG2 loci yielded amplification products at the expected molecular weight. PCR for the WTX gene that resides 60 Mb centromeric to the STAG2 gene on the X chromosome yielded amplification products at the predicted molecular weight in all three glioblastoma cell lines.

**Supplementary Table 1.** Genetic lesions of STAG2 identified in diverse human tumor types including zygosity of genetic lesions, mechanism of biallelic inactivation, and known karyotypic aberrations in these tumor samples.

**Supplementary Figure 2.** STAG2 mutations identified in glioblastoma cells. **(A)** H4 cells have a 25 bp insertion/duplication in exon 12 resulting in a frameshift and early truncation of the encoded STAG2 protein. **(B)** 42MGBA cells have a nonsense mutation in codon 653 in exon 20 resulting in early truncation of the encoded STAG2 protein.

**Supplementary Figure 3.** STAG2 mutations identified in glioblastoma tumor samples. **(A)** GBM p785 has a somatic missense mutation at codon 299 in exon 11, resulting in an aspartic acid to alanine change in the stromalin conservative domain (SCD) of STAG2. **(B)** GBM 14 has a G>C mutation in the canonical splice acceptor of exon 9. **(C)** GBM 44 has a two bp deletion (AA) in exon 9 causing a frameshift and early

truncation of the encoded STAG2 protein. **(D)** SF7300 has a C>T mutation in the splice acceptor of exon 11.

**Supplementary Figure 4. (A-C)** Western blots demonstrate complete loss of STAG2 expression in 2/20 hematologic, 1/6 cervical, and 1/4 kidney cancer cell lines.

**Supplementary Figure 5.** Human cancer cell lines in which no loss of STAG2 expression was observed. **(A-I)** Western blots for STAG2 and  $\alpha$ -tubulin on protein isolated from 6 neuroblastoma, 14 lung, 13 colorectal, 3 gastric, 5 pancreatic, 7 gynecologic, 6 prostate, 5 bone, and 27 breast cancer cell lines.

**Supplementary Figure 6.** Homozygous genomic deletion of STAG2 in ES-8 Ewing's sarcoma and LOX IMVI melanoma cells. **(A)** PCR for exon 1 in the 5' untranslated region of the STAG2 gene using ES-8 genomic DNA as template resulted in no amplification product at the correct molecular weight. PCR for all coding exons of STAG2 using genomic DNA from LOX IMVI cells as template yielded no amplification products at the correct molecular weight. PCR using genomic DNA from A172 and U87MG cells with intact STAG2 loci yielded amplification products at the expected molecular weight for each STAG2 exon. **(B)** Subsequent analysis of Affymetrix SNP 6.0 copy number array data for ES-8 and LOX IMVI cells revealed focal homozygous deletions encompassing the STAG2 locus. These copy number data were obtained from the Wellcome Trust Sanger Institute Cancer Genome Project (<http://www.sanger.ac.uk/genetics/CGP>).

**Supplementary Figure 7.** Intragenic deletion of STAG2 coding exons 28-30 in SR immunoblastic lymphoma cells in which no STAG2 protein was detected. **(A)** PCR for STAG2 coding exons 28-30 on genomic DNA from SR cells resulted in no amplification



products, whereas PCR on genomic DNA from A172 and U87MG cells with intact STAG2 loci yielded amplification products at the expected molecular weight. PCR for STAG2 coding exons 27 and 31 yielded amplification products at the predicted molecular weight in all three cell lines. **(B)** RT-PCR amplification of STAG2 from total RNA isolated from SR cells revealed the absence of sequence from the deleted coding exons 28-30 and the inappropriate junction of exon 27 with exon 31 in the maturely spliced STAG2 mRNA.

**Supplementary Figure 8.** STAG2 mutations identified in Ewing's sarcoma and cervical carcinoma cells. **(A)** SK-ES-1 cells have a nonsense mutation in codon 735 in exon 23 resulting in early truncation of the encoded STAG2 protein. **(B)** TC-252 cells have a one bp insertion (T) in exon 20 causing a frameshift and early truncation of the encoded STAG2 protein. **(C)** A4573 cells have a heterozygous one bp deletion (A) in exon 25 causing a frameshift and early truncation of the encoded STAG2 protein. Sequencing of the STAG2 mRNA from A4573 cells demonstrated that only the mutant allele is expressed. **(D)** CaSki cells have a 20 bp deletion that includes the intron, splice acceptor, and coding sequence of exon 9 causing early truncation of the encoded STAG2 protein.

**Supplementary Figure 9.** STAG2 mutations identified in malignant melanoma and Ewing's sarcoma tumor samples. **(A)** MM 29T has a somatic 6 bp duplication, causing an insertion of Asp-Met at codon 225 in the stromal antigen (STAG) domain of the encoded STAG2 protein. **(B)** ES 37 has a somatic A>G mutation 8 bp upstream of the initiating methionine in the putative Kozak consensus sequence of STAG2.

**Supplementary Figure 10.** Generation and characterization of a green fluorescent protein (GFP)-STAG2 fusion protein. A full-length wild-type human STAG2 cDNA (provided by Jan-Michael Peters) was excised from pFastBac1 with Sall + XhoI and cloned in-frame into the XhoI site of the pEGFP-C3 vector (Clontech), thereby resulting in fusion of GFP to the N-terminus of STAG2. **(A)** Transfection of 293T cells with pEGFP-STAG2 resulted in expression of the GFP-STAG2 fusion protein at the expected molecular weight of 168 kDa detectable by both GFP and STAG2 antibodies, whereas transfection with empty pEGFP-C3 resulted in expression of free GFP at 27 kDa detectable only by GFP antibody. **(B)** Visualization of GFP-STAG2 in cells counterstained with Hoechst 33342 revealed localization in interphase cells exclusively in the nucleus (top panels). Consistent with previous reports of STAG2 dynamics, GFP-STAG2 was largely dissociated from condensed chromosomes in mitotic cells during late prophase (middle panels) and metaphase (bottom panels). **(C)** Extraction of soluble proteins with low concentration detergent (0.1% Triton X-100) for 5 min prior to formaldehyde fixation revealed that GFP-STAG2 resides largely as an insoluble nuclear protein in interphase cells, consistent with its function as a chromatin-bound cohesin subunit.

**Supplementary Figure 11.** Tumor-derived mutations disrupt STAG2 localization and nuclear dynamics. Mutations identified in human tumor samples were engineered into the coding sequence of the STAG2 cDNA in the pEGFP-STAG2 expression vector and confirmed by DNA sequencing. **(A)** Empty pEGFP-C3, GFP-STAG2 wild-type, and five tumor-derived mutants were transfected into 293T cells, and Western blot was performed with antibodies to GFP and STAG2 (which is recognized at an epitope in the

C-terminus between amino acids 1130-1231). The three truncating mutations (A223X, S653X, and Q735X) produced truncated STAG2 proteins detected only with the GFP antibody, whereas the two missense mutations (K225insNM and D299A) produced full-length STAG2 proteins detected by both GFP and STAG2 antibodies. **(B)** Visualization of GFP-STAG2 wild-type expression in cells counterstained with Hoechst 33342 revealed localization exclusively in the nucleus, whereas the three truncating mutations resulted in localization of GFP-STAG2 to the cytoplasm and exclusion from the nucleus. The two missense mutations resulted in GFP-STAG2 localization to the cell nucleus similar to wild-type protein (data not shown). **(C)** Extraction with 0.1% Triton X-100 for 5 min prior to formaldehyde fixation revealed that GFP-STAG2 wild-type resides largely as an insoluble nuclear protein, whereas the two missense mutations disrupt the nuclear interactions of GFP-STAG2 resulting in soluble detergent-extractable proteins.

**Supplementary Figure 12.** Expression of STAG1 and other genes involved in sister chromatid cohesion are not upregulated in response to STAG2 inactivation. **(A)** Western blot analysis of STAG1 levels in 21 glioblastoma cell lines, including three with mutational inactivation of STAG2. **(B)** Western blot analysis of STAG1 and SGOL1 levels in isogenic sets of STAG2 KO (HCT116) and KI (H4) human cancer cells. **(C)** Analysis of expression microarray data for genes known to regulate sister chromatid cohesion in isogenic sets of STAG2 KI (H4, 42MGBA) and KO (HCT116) human cancer cells.

**Supplementary Figure 13.** Loss of STAG2 expression in cancer cells with heterozygous mutations of STAG2 is not reversible by inhibition of DNA methylation. **(A)** TC-71 cells (derived from a male patient, harboring wild-type STAG2), TC-32 cells

(female patient, heterozygous frameshift mutation of STAG2), A4573 cells (female patient, heterozygous frameshift mutation of STAG2), and SK-ES-1 cells (male patient, homozygous nonsense mutation of STAG2) were cultured in the presence or absence of 10  $\mu$ M 5-aza-2-deoxycytidine for 96 hours. Total protein was harvested in RIPA buffer and assayed for STAG2 expression by Western blot. **(B)** Western blot for RASSF1A, known to be silenced by DNA methylation and induced by 5-aza-2-deoxycytidine in SK-ES-1 cells, is shown as a control.

**Supplementary Figure 14.** Validation of a STAG2 antibody for immunohistochemistry in formalin-fixed, paraffin-embedded tissue. **(A)** STAG2-deficient (H4 non-recombinant clone 10) and STAG2-proficient (H4 STAG2 KI post-Cre clone 8-1) cells were fixed in 4% formalin, immersed in Histogel, embedded in paraffin, and then sectioned onto the same slide for simultaneous staining. Immunohistochemistry was performed using the STAG2 clone J-12 mouse monoclonal antibody (Santa Cruz Biotechnology, sc-81852), which binds to an epitope near the C-terminus of the protein that is absent in cells with truncating mutations of the STAG2 gene (*e.g.* H4 cells). Antibody complexes were visualized by 3,3'-diaminobenzidine enzymatic reaction, and counterstaining with hematoxylin was performed. STAG2 staining was completely absent in non-recombinant H4 cells but was intensely present in the STAG2-corrected H4 clone. This staining was observed exclusively in the nucleus of each cell without significant cell-to-cell variation in expression level, consistent with previous reports on the localization and expression of STAG2. **(B)** Similar absence of STAG2 staining by immunohistochemistry was observed in additional cell lines harboring truncating mutations of STAG2, including 42MGBA cells shown here.

**Supplementary Figure 15.** Levels of STAG2 expression are not dependent on cell cycle stage. **(A)** Asynchronously proliferating HCT116 and 293T cells (both with unmodified wild-type STAG2 alleles) were cultured in the presence or absence of 200 ng/mL nocodazole for 12 hrs, stained with propidium iodide (PI), and assayed by flow cytometry. **(B)** Total cell lysate was collected from cells treated as in (A), and levels of STAG2 expression were measured by Western blot. These data indicate that cell-to-cell variation observed in immunohistochemistry of primary tumors is due to intratumoral genetic heterogeneity and not due to differences in cell cycle stage.

**Supplementary Figure 16.** Immunohistochemistry with STAG2 and  $\alpha$ -tubulin antibodies to normal non-neoplastic tissue is shown from appendix, lymph node, skeletal muscle, thymus gland, and skin. Robust expression of STAG2 was ubiquitously observed in all non-neoplastic tissues studied.

**Supplementary Table 2.** Clinical and pathological characteristics of human primary tumors demonstrating STAG2 loss by immunohistochemistry.

**Supplementary Figure 17.** STAG2 immunohistochemistry of additional glioblastoma tumors. STAG2-expressing lymphocytes surround an island of STAG2-deficient tumor cells in glioblastoma C10, demonstrating the somatic nature of STAG2 loss in this patient's tumor.

**Supplementary Figure 18.** STAG2 immunohistochemistry of melanoma tumors.

**Supplementary Figure 19.** STAG2 immunohistochemistry of additional Ewing's sarcoma tumors. STAG2-expressing perivascular endothelial cells are present in both

STAG2-deficient Ewing's sarcoma tumors, demonstrating the somatic nature of STAG2 loss in these tumors.

**Supplementary Figure 20.** Intratumoral heterogeneity of STAG2 expression in two replicate cores of a Ewing's sarcoma.

**Supplementary Figure 21.** STAG2 immunohistochemistry of two STAG2-proficient lymphomas and two replicate cores of lymphoma A11/B11 with intratumoral heterogeneity for STAG2 loss.

**Supplementary Figure 22.** STAG2 immunohistochemistry of medulloblastoma tumors.

**Supplementary Figure 23.** STAG2 immunohistochemistry of colorectal (CRC) adenocarcinoma tumors. STAG2-expressing stromal fibroblasts and perivascular endothelial cells are present in both STAG2-deficient tumors, demonstrating the somatic nature of STAG2 loss in these tumors.

**Supplementary Figure 24.** PCR screen and DNA sequence confirmation of 42MGBA STAG2 knockin clones. **(A)** 42MGBA cells were infected with an AAV-STAG2 KI vector as depicted in Fig. 3A. Individual G418-resistant clones were established by limiting dilution in 96-well plates, genomic DNA prepared, and tested by PCR for homologous integration of the targeting vector. Clones with random integration of the targeting vector generate a single 1.3 kb band, whereas clones with targeted integration (53 and 92) generate a 1.0 kb band as well. **(B)** PCR products derived from the targeted allele were sequenced to demonstrate that the endogenous mutant STAG2 gene had been corrected via homologous recombination.

**Supplementary Figure 25.** Targeting strategy for correction of STAG2 mutation in H4 cells and introduction of a nonsense mutation in HCT116 cells. **(A)** Diagram depicting the targeted homologous recombination event for correcting the endogenous STAG2 25 bp insertion causing a frameshift at codon 357 in H4 cells. In the initial step, an AAV-based targeting vector was created for the purpose of correcting the exon 12 mutation, leaving behind a FLOXed splice acceptor-IRES-Neo<sup>R</sup> gene in intron 13. Clones with targeted integration and mutation correction were identified by PCR and DNA sequencing. These cells (pre-Cre clones) were then transiently infected with a Cre-expressing adenovirus, and completed STAG2 knock-in (KI) clones in which the splice acceptor-IRES-Neo<sup>R</sup> gene had been deleted by Cre/LoxP recombination were identified by screening for G418-sensitivity (post-Cre clones). **(B)** Diagram depicting the targeted homologous recombination event for introducing a nonsense mutation into codon 6 of the STAG2 gene in HCT116 cells. In the initial step, an AAV-based targeting vector was created for the purpose of introducing the mutation into exon 3, leaving behind a FLOXed splice acceptor-IRES-Neo<sup>R</sup> gene in intron 3. Clones with targeted integration and introduction of the mutation were identified by PCR and DNA sequencing.

**Supplementary Figure 26.** Western blot confirmation of H4 and HCT116 STAG2 gene targeted cells. **(A)** H4 parental cells and two pre-Cre clones in which the STAG2 KI vector had integrated by homologous recombination but in which the splice acceptor-IRES-Neo<sup>R</sup> had not yet been removed fail to express STAG2 protein. The pre-Cre clones fail to express STAG2 protein due to aberrant splicing between STAG2 exon 12 and the splice acceptor-IRES-Neo<sup>R</sup>. Six STAG2 KI post-Cre clones in which the splice acceptor-IRES-Neo<sup>R</sup> was successfully removed via Cre/LoxP recombination express

physiologic levels of corrected STAG2 protein, comparable to the levels in C33A and HeLa cells with unmodified wild-type STAG2 alleles. **(B)** Parental HCT116 cells and three clones in which the STAG2 KO vector integrated randomly (non-recombinants) express physiologic levels of STAG2 protein, comparable to DLD-1 cells. In contrast, four clones in which the STAG2 KO vector integrated via homologous recombination, introducing a nonsense mutation into codon 6, demonstrate abrogation of STAG2 expression. In these clones, a small amount of STAG2 appears to be expressed, presumably via re-initiation at a downstream methionine such as amino acid 70.

**Supplementary Figure 27.** Depletion of STAG2 expression via lentiviral shRNA in multiple human cell lines with stable karyotype leads to sister chromatid cohesion defects. **(A)** Two near-diploid human colon cancer cell lines (HCT116 and DLD-1) and one near-diploid human breast cancer cell line (CAL-51) with stable karyotypes were infected with lentivirus expressing two unique shRNAs to STAG2 or empty pLKO vector. Stably expressing pooled clones were established by puromycin selection and assayed for STAG2 expression by Western blot. shRNA 3782 effectively reduced the level of STAG2 protein by >99.9%. **(B)** STAG2-proficient and shRNA-depleted cells were arrested in mitosis using taxol for 6 hrs, Giemsa stained, and assayed for sister chromatid cohesion. The fraction of cells with cohered and parallel sister chromatids is plotted.

**Supplementary Figure 28.** Global gene expression profiling of isogenic sets of STAG2 gene targeted cells. **(A)** Affymetrix GeneChip Human Gene 1.0 ST arrays were used to generate gene expression profiles in parental H4 cells, two independently derived non-recombinant clones, and three independently derived STAG2 KI post-Cre clones.



Composite expression profiles of the three STAG2-mutant cells is plotted against the composite expression profiles of the three STAG2-corrected cells. **(B)** Identical composite expression profile comparison as in (A) using two non-recombinant HCT116 clones and two HCT116 STAG2 KO clones.

**Supplementary Table 3.** List of genes whose expression is modulated by STAG2 in H4 glioblastoma cells. Genes differentially expressed (>3.0-fold at  $p < 0.05$ ) in STAG2-deficient (H4 parental cells and two non-recombinant clones) and STAG2-proficient H4 cells (three STAG2 KI post-Cre clones) are listed.

**Supplementary Table 4.** List of genes whose expression is modulated by STAG2 in 42MGBA glioblastoma cells. Genes differentially expressed (>1.5-fold at  $p < 0.05$ ) in STAG2-deficient (42MGBA parental cells and two pre-Cre clones) and STAG2-proficient 42MGBA cells (three STAG2 KI post-Cre clones) are listed.

**Supplementary Table 5.** List of genes whose expression is modulated by STAG2 in HCT116 cells. Genes differentially expressed (>2.0-fold at  $p < 0.05$ ) in STAG2-proficient (two HCT116 non-recombinant clones) and STAG2-deficient HCT116 cells (two STAG2 KO clones) are listed.

**Supplementary Figure 29. (A)** Asynchronously proliferating STAG2-deficient and proficient H4 cells were fixed in ethanol, stained with propidium iodide, and analyzed by flow cytometry. Representative histograms are shown with the DNA content of 17,600 cells plotted for both clones. The width of the 2N and 4N peaks is substantially greater in STAG2-deficient than in STAG2-corrected H4 cells. **(B)** Quantification of the coefficient of variance (a measure of variation in DNA content within a cell population) of

the 2N peak from asynchronously proliferating STAG2-deficient and proficient H4 and HCT116 cells is shown. \*,  $p < 0.05$ .

**Supplementary Figure 30.** Karyotypic analysis of STAG2-proficient and deficient cells. Isogenic STAG2-proficient and deficient cells were arrested in mitosis and karyotypes prepared using Wright's Stain. Chromosomes were counted in 100 prometaphase cells for each cell line to determine the diversity of chromosome counts within the cell population. Chromosome counts and statistical analysis are shown for STAG2-proficient and deficient H4 **(A)**, 42MGBA **(B-C)**, HCT116 **(D)**, and DLD-1 cells **(E)**. Distribution curves derived from this data are depicted in Fig. 4C-D.

**Supplementary Figure 31. (A-C)** Three representative karyotypes from HCT116 STAG2 KO clone #7. Ten karyotypes were prepared by G-banding which demonstrated that each cell derived from this single cell clone contained unique chromosomal aberrations including trisomies, monosomies, translocations, and marker chromosomes (UC).

# Supplementary Figure 1

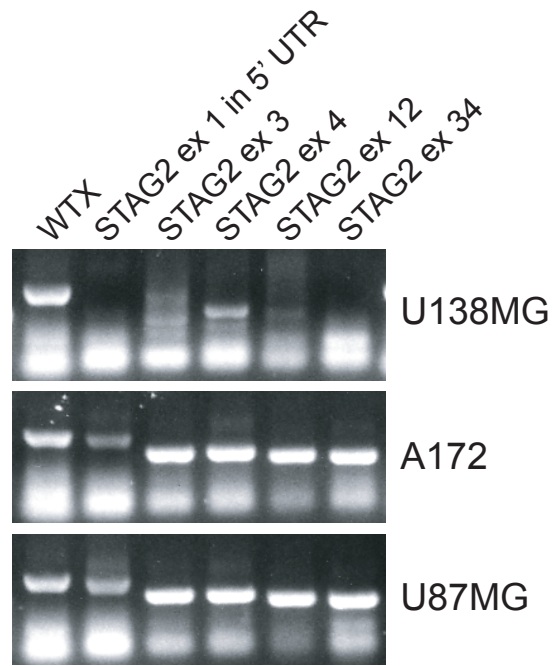

## Supplementary Table 1

| Sample   | Tumor type                 | Sample type       | Mutation observed                     | Exon no. # | mRNA position # | Protein change #  |
|----------|----------------------------|-------------------|---------------------------------------|------------|-----------------|-------------------|
| KG-1     | acute myelogenous leukemia | cell line         | none identified                       | -          | -               | no protein        |
| CaSki    | cervical carcinoma         | cell line         | deletion TTTACTCTTTAAAAATAGCT         | 9          | 1072(-18)..1073 | 223A>truncation   |
| A4573    | Ewing's sarcoma            | cell line         | deletion A                            | 25         | 2929            | 842N>frameshift   |
| ES-8     | Ewing's sarcoma            | cell line         | deletion of noncoding exons in 5' UTR | 1,2        | 1..307          | no protein        |
| SK-ES-1  | Ewing's sarcoma            | cell line         | C>T (nonsense)                        | 23         | 2607            | 735Q>Stop         |
| SK-NEP-1 | Ewing's sarcoma            | cell line         | none identified                       | -          | -               | no protein        |
| TC-252   | Ewing's sarcoma            | cell line         | insertion T                           | 20         | 2310..2311      | 636Y>frameshift   |
| TC-32    | Ewing's sarcoma            | cell line         | insertion T                           | 20         | 2310..2311      | 636Y>frameshift   |
| ES 37    | Ewing's sarcoma            | primary tumor     | A>G, 8 bp upstream of initiating ATG  | 3          | 397             | no protein        |
| 42MGBA   | glioblastoma               | cell line         | C>G (nonsense)                        | 20         | 2362            | 653S>Stop         |
| H4       | glioblastoma               | cell line         | insertion TACTGCTCTACAAGGGCTTTATTAT   | 12         | 1472..1473      | 357N>frameshift   |
| U138MG   | glioblastoma               | cell line         | whole gene deletion                   | 1-35       | 1..6277         | no protein        |
| GBM p785 | glioblastoma               | primary tumor     | A>C (missense)                        | 11         | 1300            | 299D>A            |
| GBM 14   | glioblastoma               | primary xenograft | G>C, splice acceptor                  | 9          | 1072(-1)        | 223A>truncation   |
| GBM 44   | glioblastoma               | primary xenograft | deletion AA                           | 9          | 1110..1111      | 236N>frameshift   |
| SF7300   | glioblastoma               | primary xenograft | C>T, splice acceptor                  | 11         | 1298(-9)        | undetermined      |
| SR       | immunoblastic lymphoma     | cell line         | intragenic deletion of exons 28-30    | 28-30      | 3180..3681      | deletion 925-1092 |
| LOX IMVI | melanoma                   | cell line         | deletion of exons 3-35                | 3-35       | 308..6277       | no protein        |
| MM 29T   | melanoma                   | primary culture   | insertion TATGAA                      | 9          | 1078..1079      | 225K>insertNM     |

#The exon number, mRNA, and amino acid coordinates are annotated according to STAG2 transcript variant 1 mRNA GenBank Accession NM\_001042749.1.

1. R.A. Pattillo *et al.*, *Science* **196**, 1456-8 (1977).
2. J. Whang-Peng *et al.*, *Cancer Genet. Cytogenet.* **21**, 185-208 (1986).
3. M.A. Smith *et al.*, *Pediatr. Blood Cancer* **50**, 703-6 (2008).
4. J.G. Hodgson *et al.*, *Neuro Oncol.* **11**, 477-87 (2009).
5. O. Fodstad *et al.*, *Int. J. Cancer* **41**, 442-9 (1988).

| gDNA zygosity | mRNA zygosity | Somatic/germline | Patient age, sex | Tumor genotype | Mechanism of biallelic inactivation      | Cytogenetic profile of tumor sample; Source of data |
|---------------|---------------|------------------|------------------|----------------|------------------------------------------|-----------------------------------------------------|
| -             | -             | ND               | 59 M             | XY             | ND                                       | modal number 47, monosomy 5,7,8,12,17; ATCC         |
| Homozygous    | -             | ND               | 40 F             | XX             | loss of heterozygosity                   | hypotriploid, modal number 77, range 66-95; ref. 1  |
| Heterozygous  | Homozygous    | ND               | 17 F             | XX             | X chromosome inactivation                | hypertriploid, modal number 71, range 52-78; ref. 2 |
| Homozygous    | -             | ND               | 10 M             | XY             | male patient w/ single allele            | t(11;22) translocation, otherwise unknown           |
| Homozygous    | -             | ND               | 18 M             | X              | male patient w/ single allele            | hyperdiploid, modal number 49, range 44-51; ATCC    |
| -             | -             | ND               | 25 F             | XX             | ND                                       | hypotriploid, range 57-67; ref. 3                   |
| Heterozygous  | Homozygous    | ND               | F                | XX             | X chromosome inactivation                | t(11;22) translocation, otherwise unknown           |
| Heterozygous  | Homozygous    | ND               | 17 F             | XX             | X chromosome inactivation                | hyperdiploid, modal number 48, range 46-49; ref. 2  |
| Homozygous    | -             | somatic          | 25 M             | unknown        | male patient                             | t(11;22) translocation, otherwise unknown           |
| Homozygous    | -             | ND               | 63 M             | XX             | male patient w/ duplicated mutant allele | hypertetraploid, range 88-95; this study            |
| Homozygous    | -             | ND               | 37 M             | XXYY           | male patient w/ duplicated mutant allele | hypertriploid, modal number 73, range 63-78; ATCC   |
| Homozygous    | -             | ND               | 47 M             | XY             | male patient w/ single allele            | hyperdiploid to pentaploid; ATCC                    |
| Homozygous    | -             | somatic          | 77 M             | unknown        | male patient                             | unknown                                             |
| Homozygous    | -             | ND               | M                | XY             | male patient w/ single allele            | monosomy 10, LOH 9p; ref. 4                         |
| Heterozygous  | Homozygous    | ND               | F                | XX             | X chromosome inactivation                | trisomy 7, monosomy 10; ref. 4                      |
| Homozygous    | -             | ND               | M                | XY             | male patient w/ single allele            | unknown                                             |
| Homozygous    | -             | ND               | 11 M             | XY             | male patient w/ single allele            | unknown                                             |
| Homozygous    | -             | ND               | 58 M             | X              | male patient w/ single allele            | modal number 46, trisomy 7; ref. 5                  |
| Homozygous    | -             | somatic          | 51 M             | unknown        | male patient                             | unknown                                             |

# Supplementary Figure 2

## A

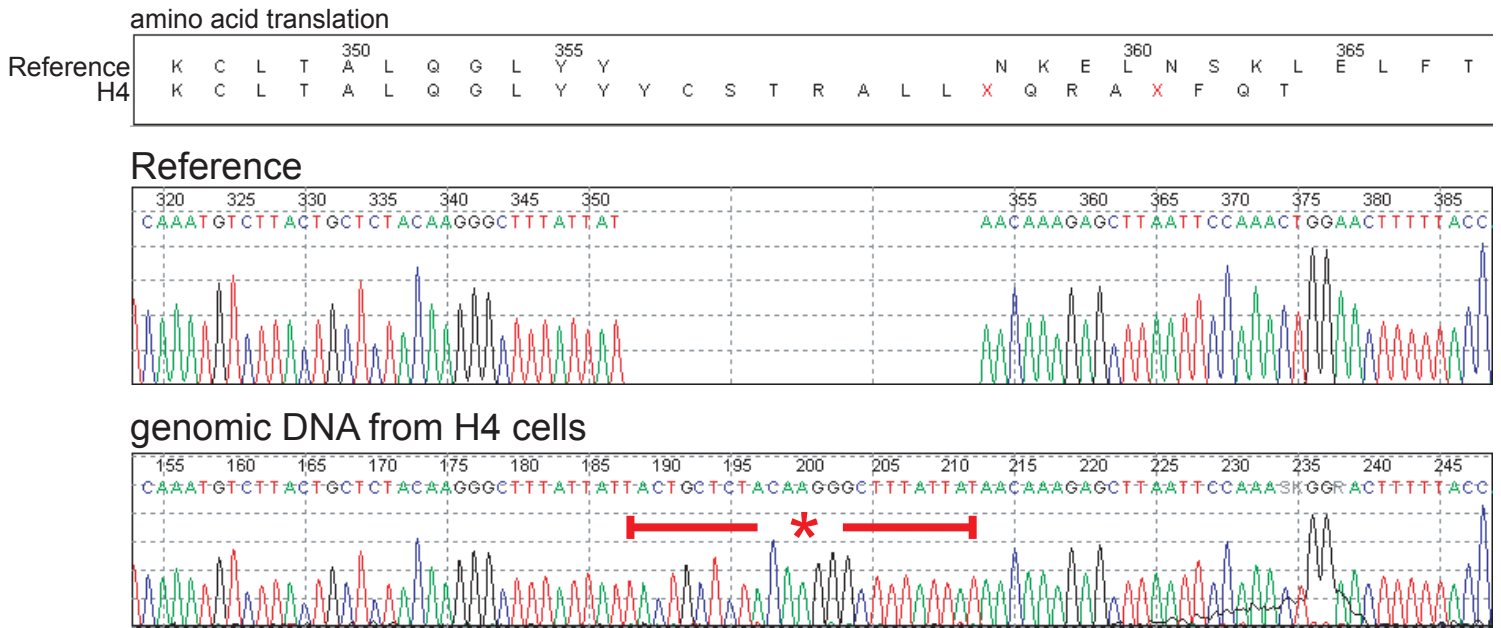

## B

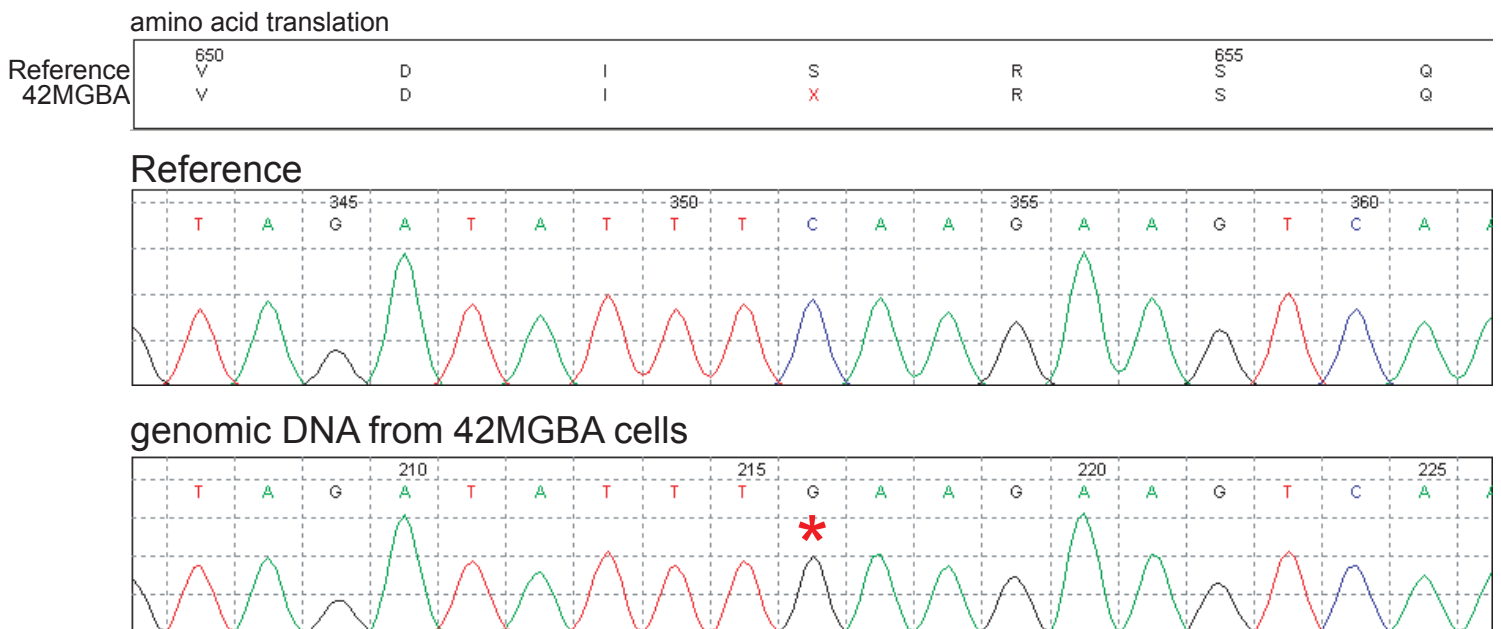

# Supplementary Figure 3A-B

**A**

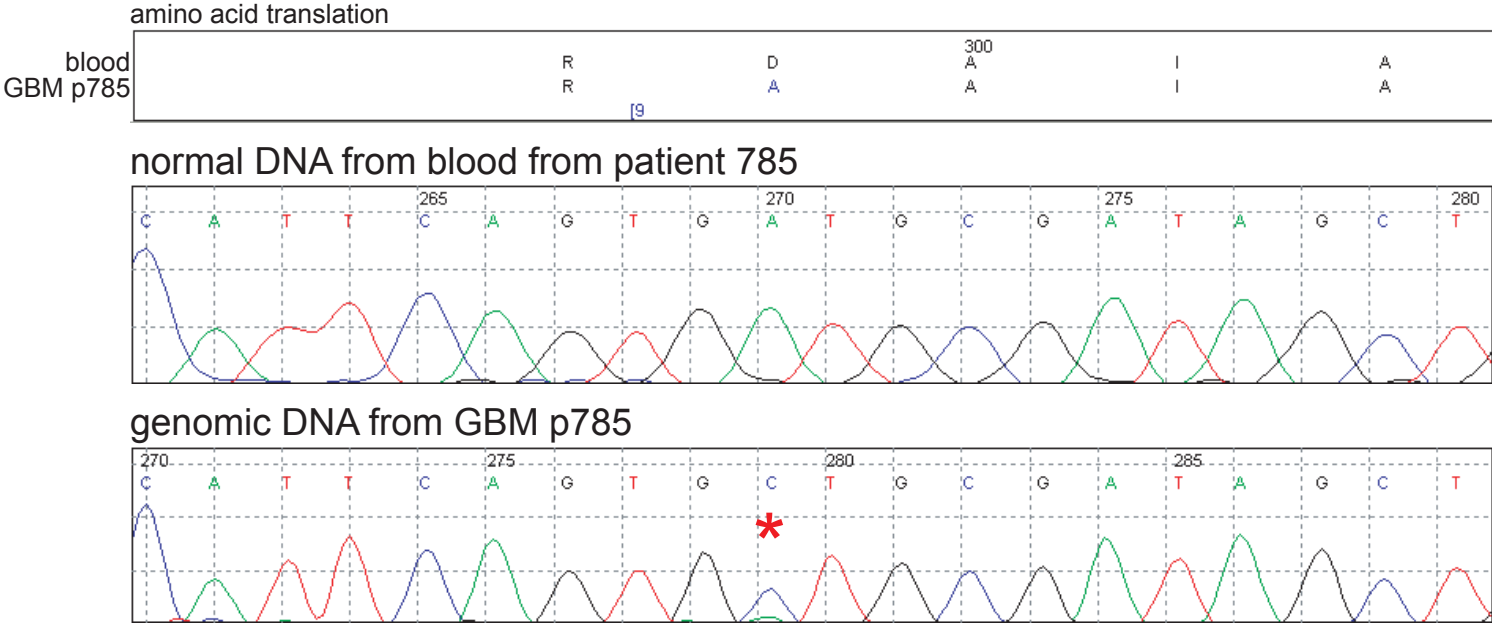

**B**

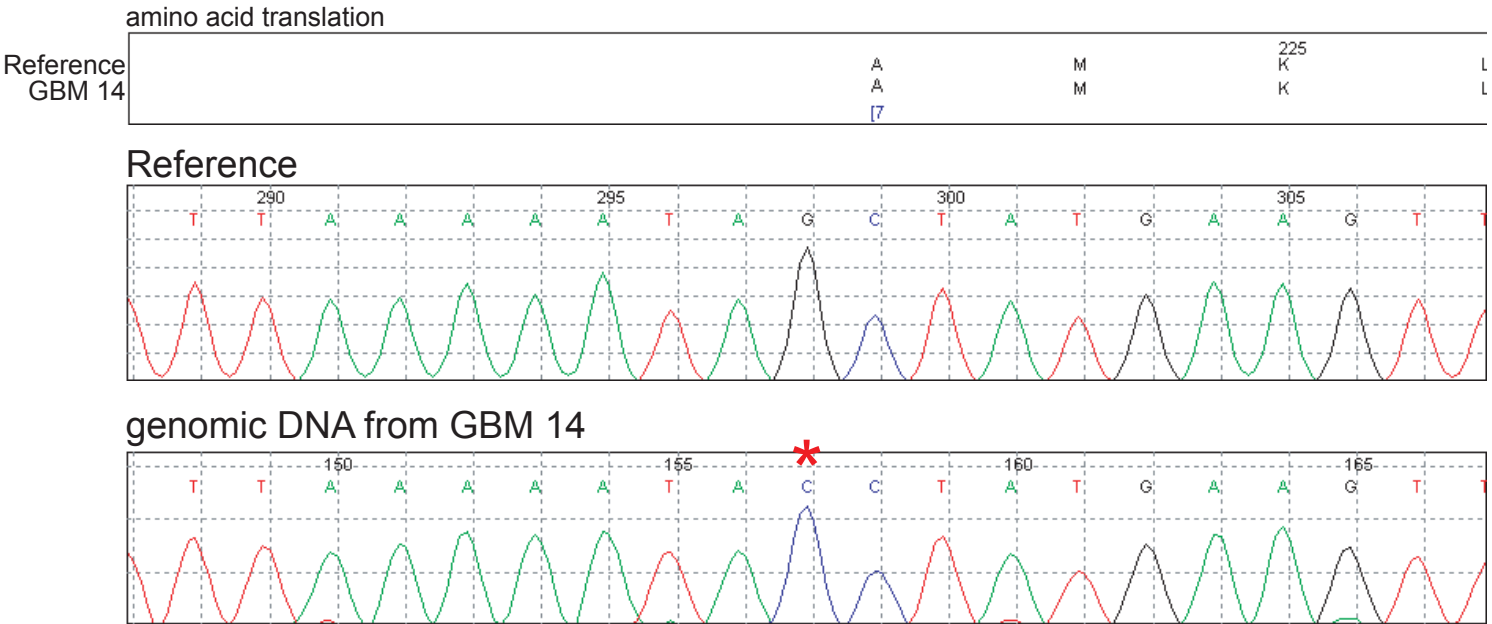

C

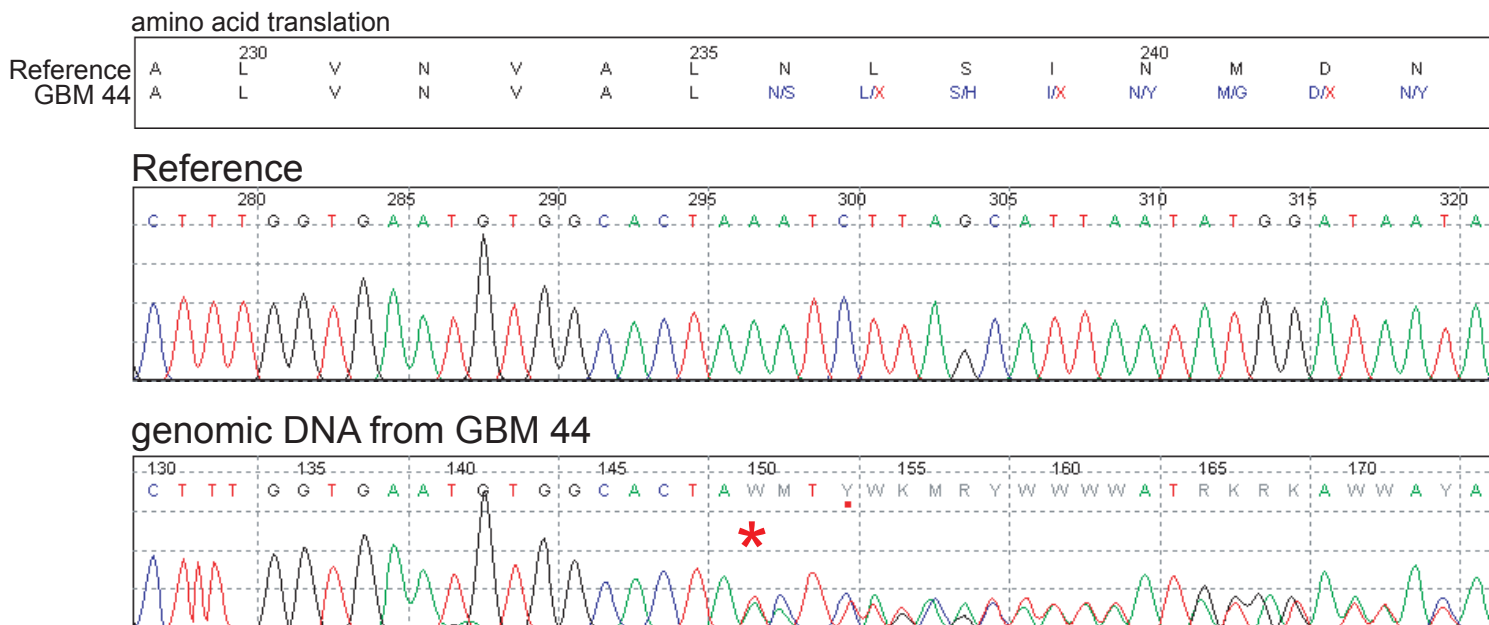

D

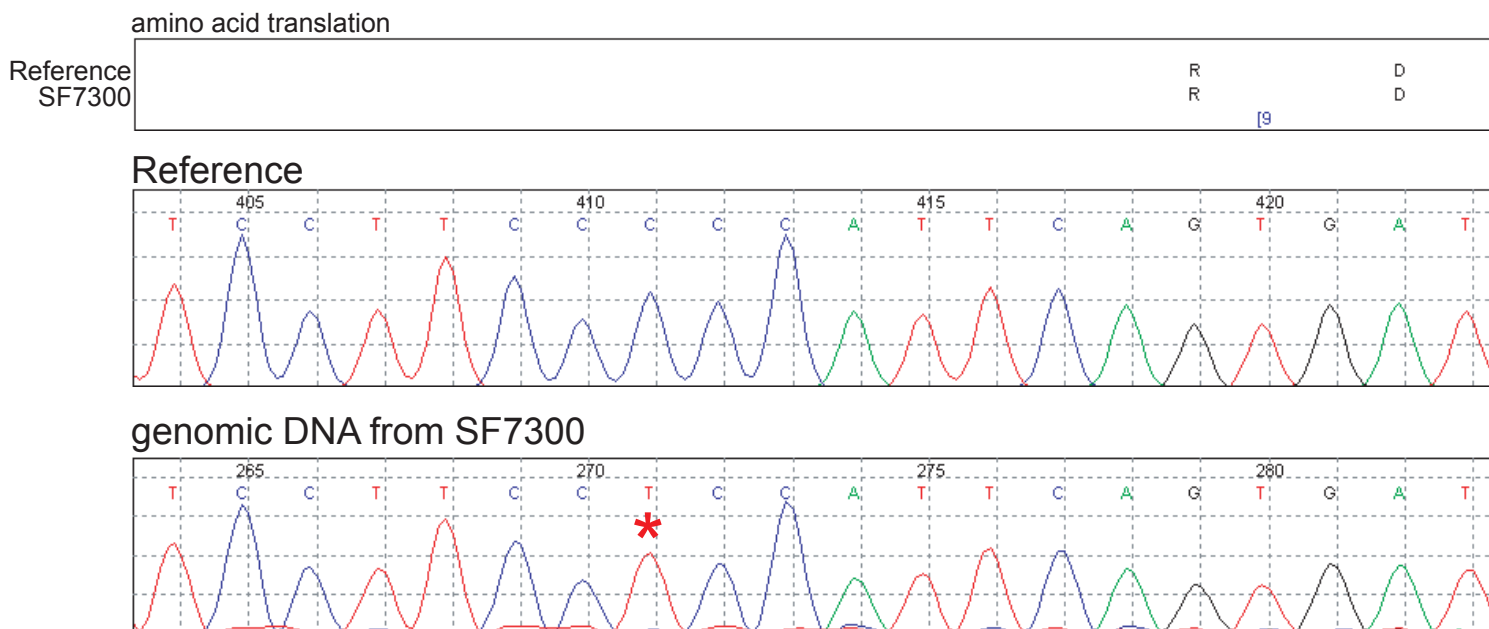



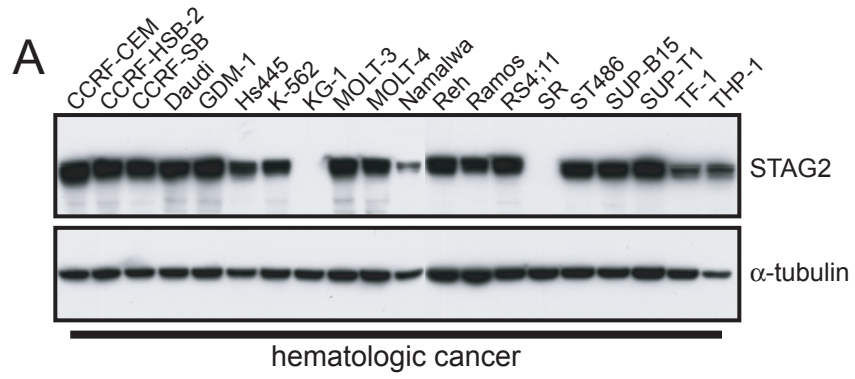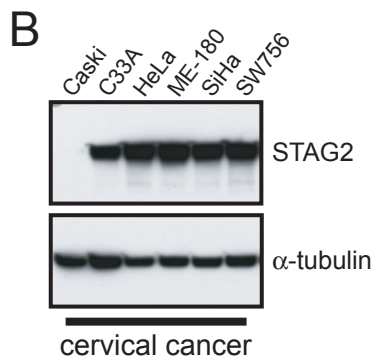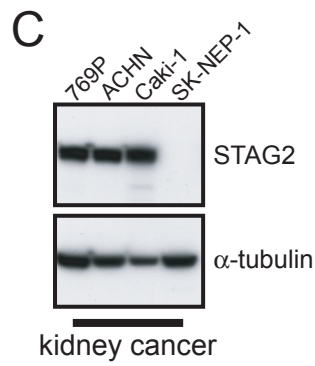

# Supplementary Figure 5

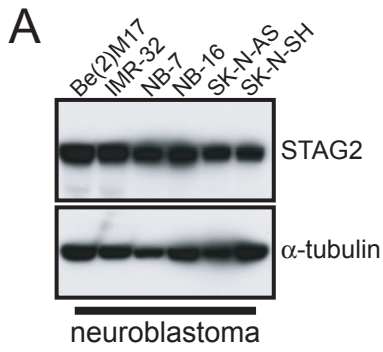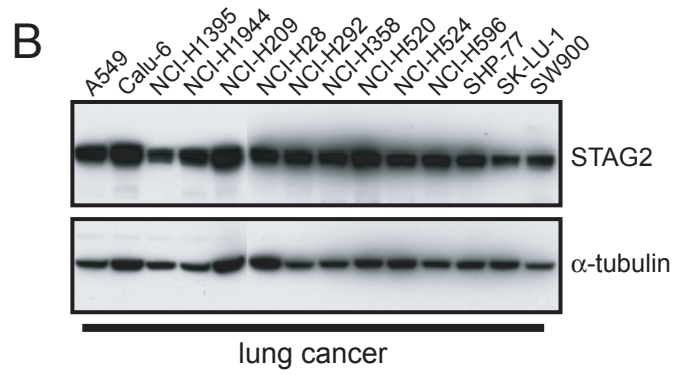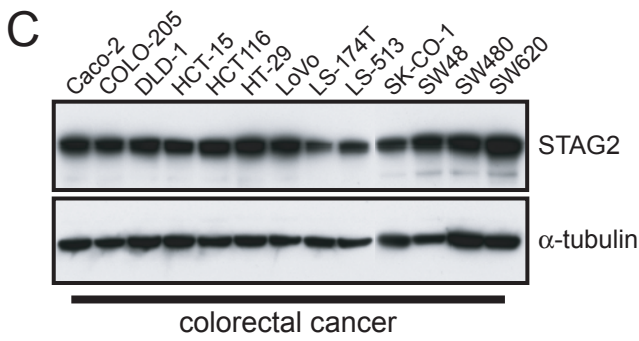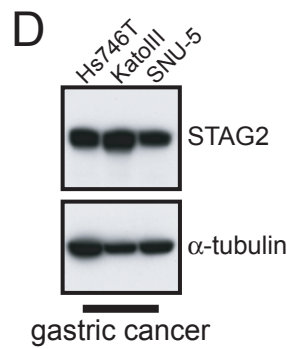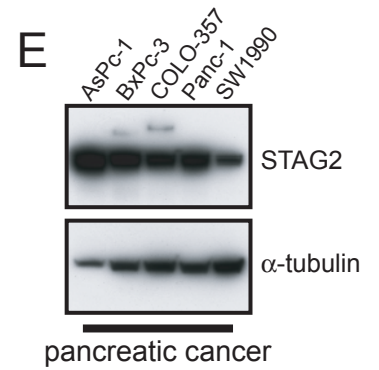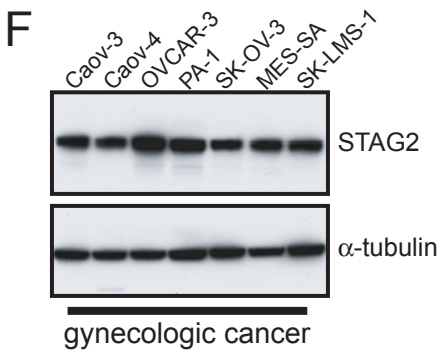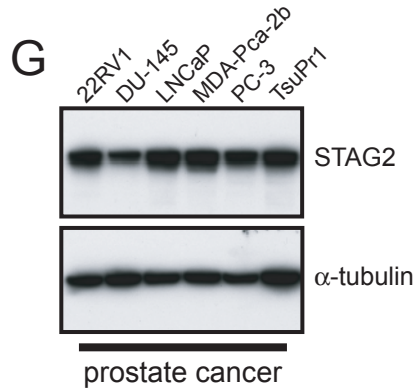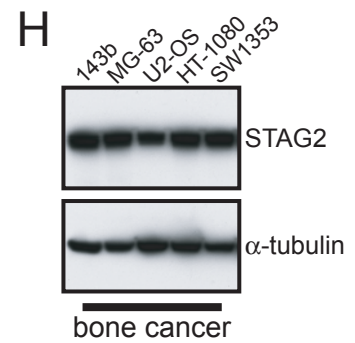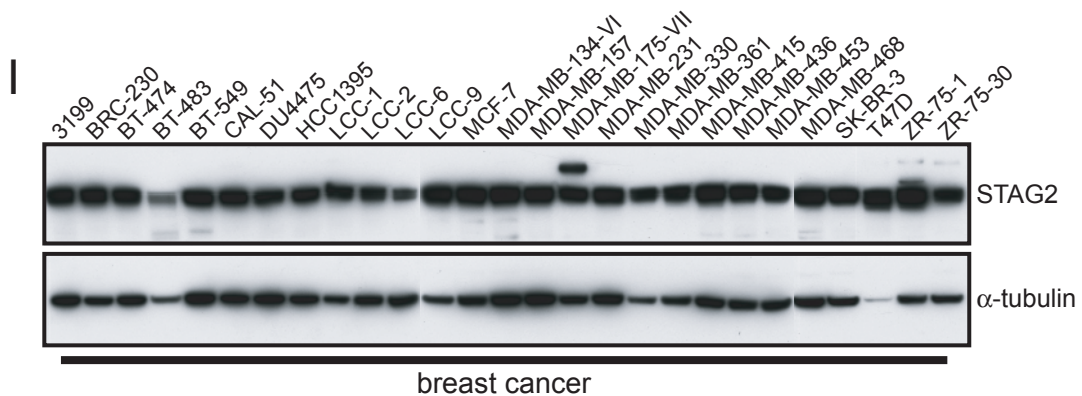

A

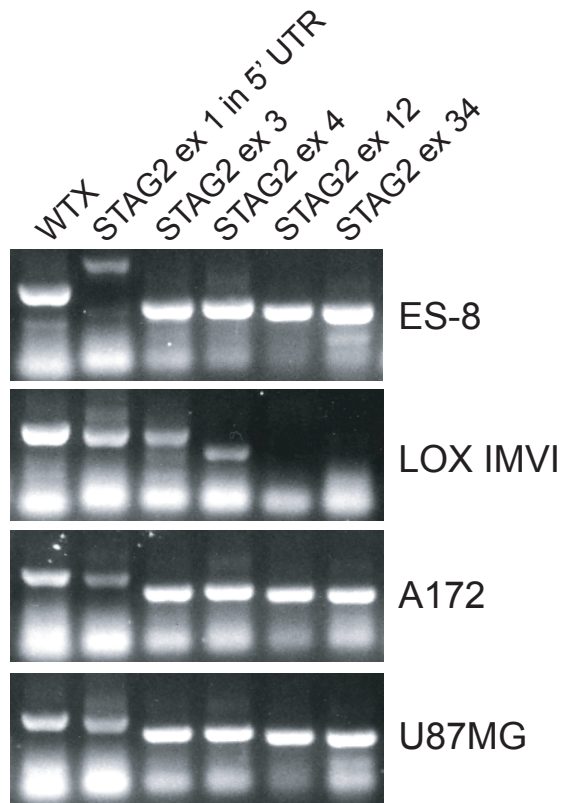

B

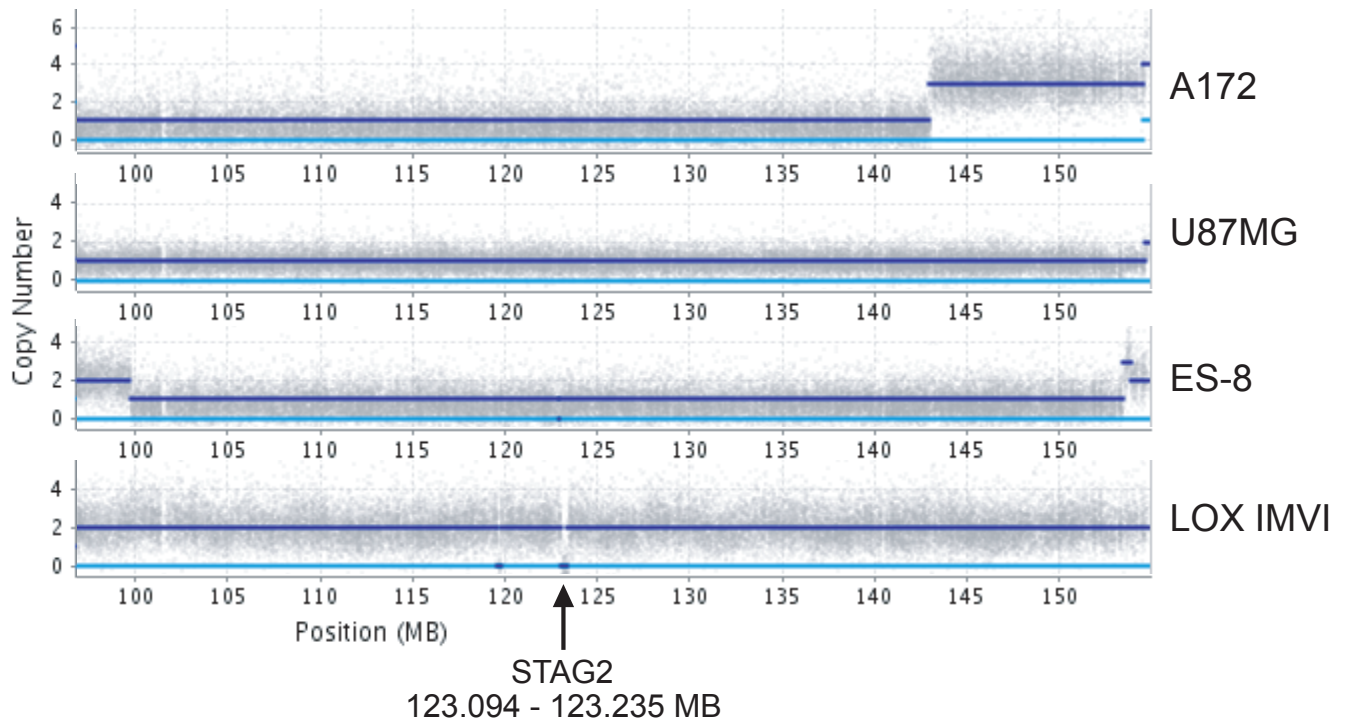

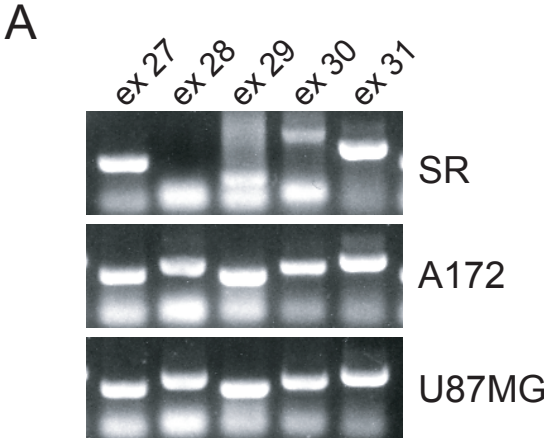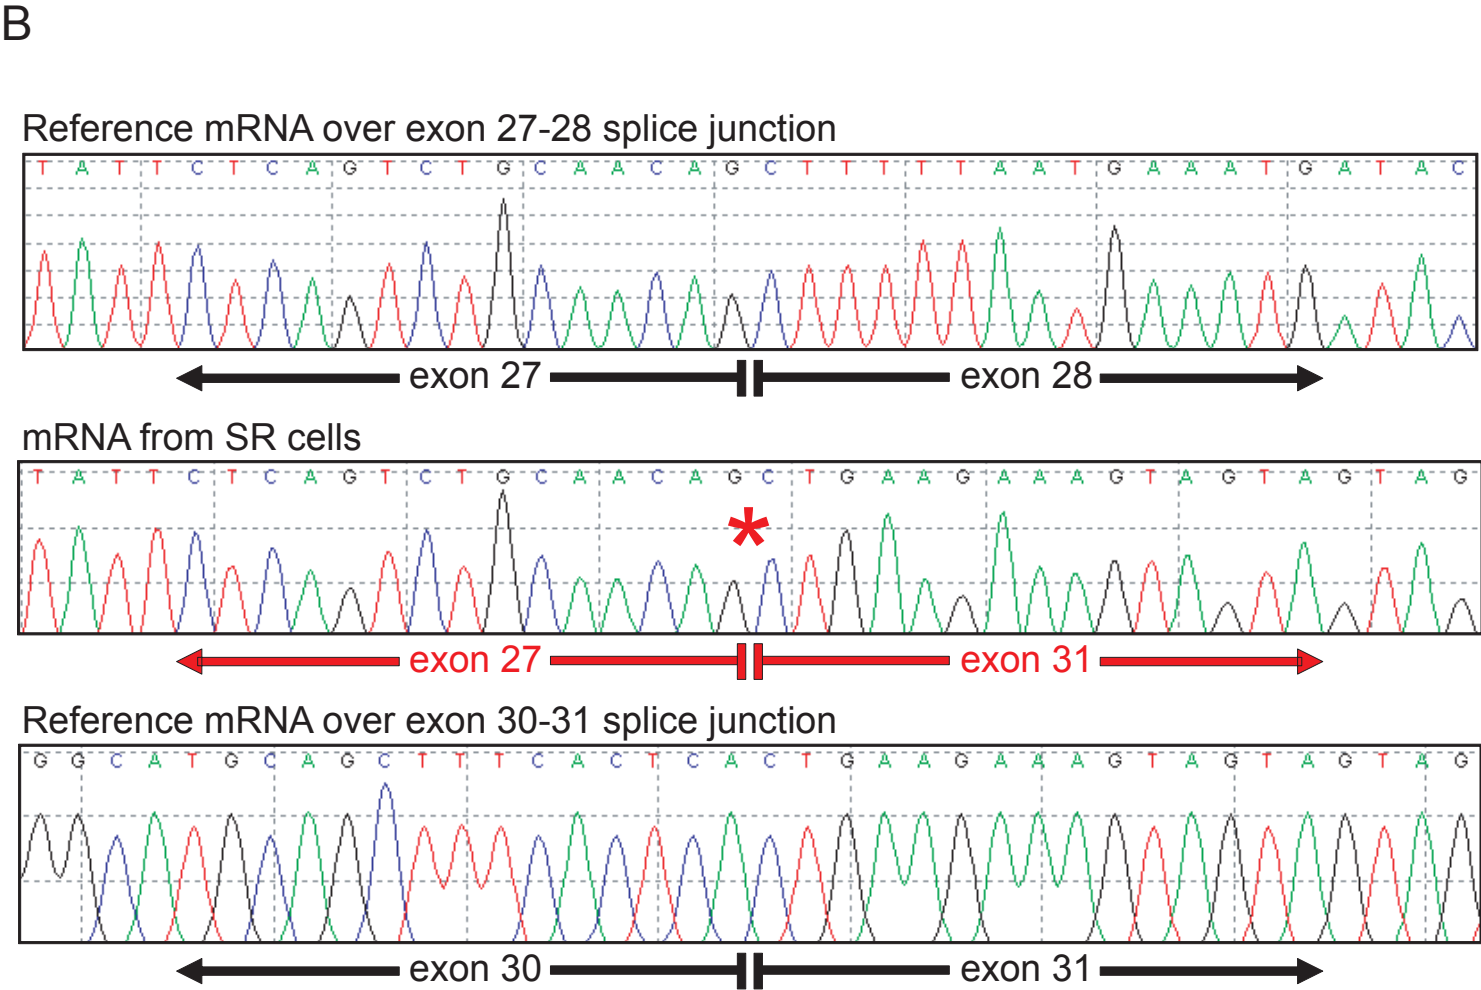

# Supplementary Figure 8A-B

## A

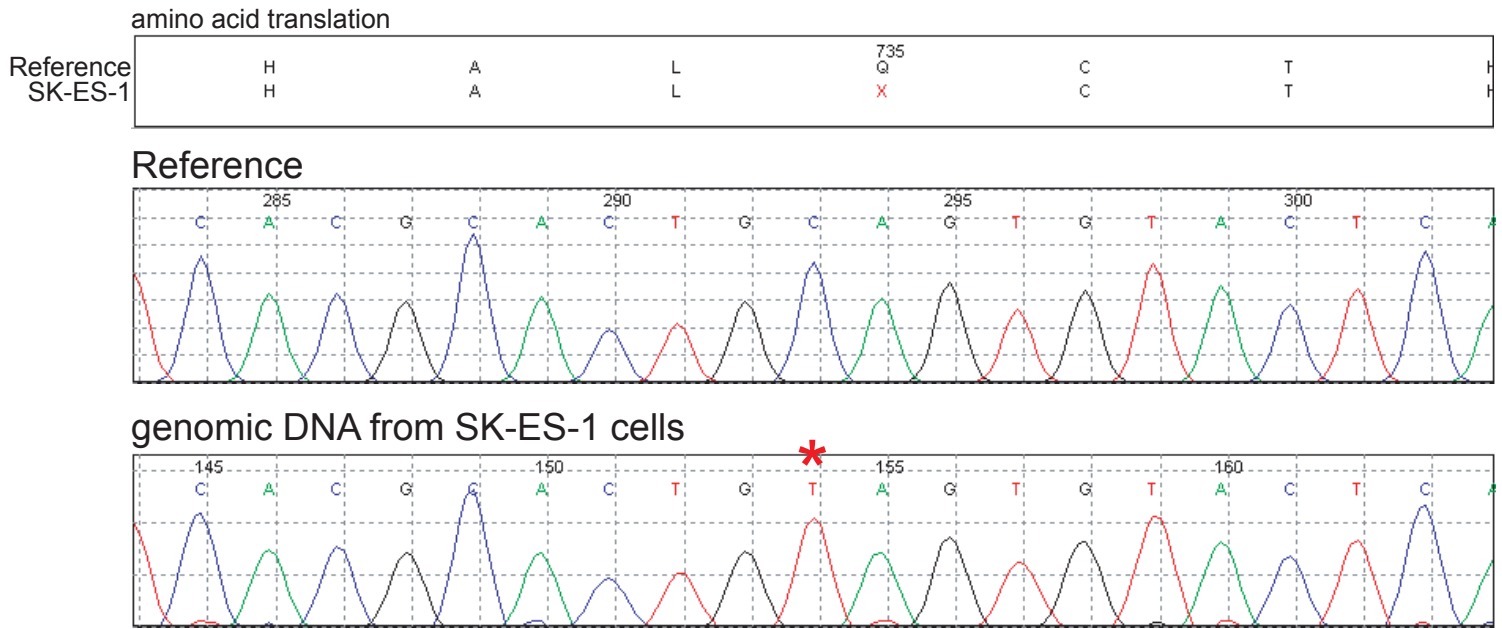

## B

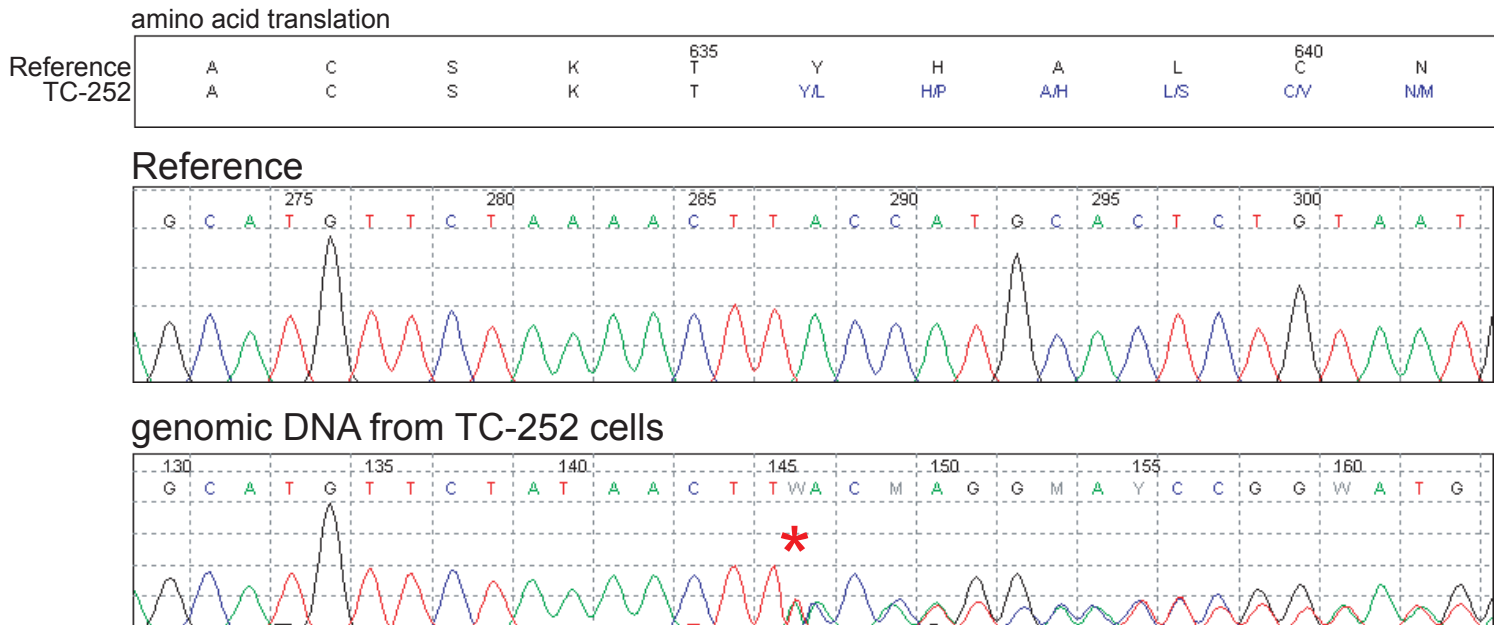

C

amino acid translation

Reference  
A4573

|     |   |   |   |   |     |   |    |    |   |   |
|-----|---|---|---|---|-----|---|----|----|---|---|
| 835 | E | Q | D | D | 840 | N | N  | S  | A | D |
| I   | E | Q | D | D | D   | N | NI | SV | A | D |

23]

Reference

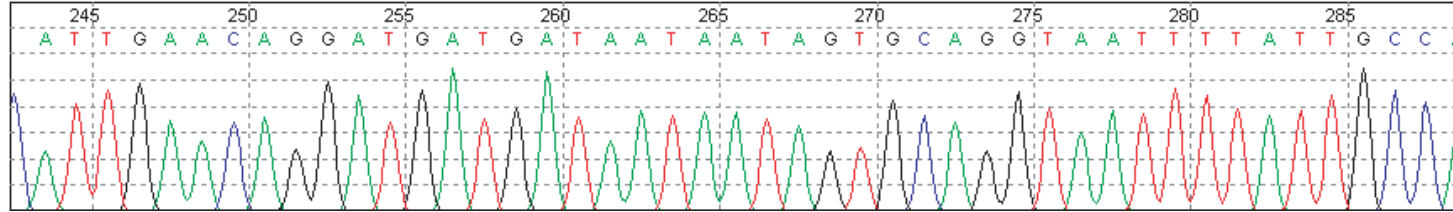

genomic DNA from A4573 cells

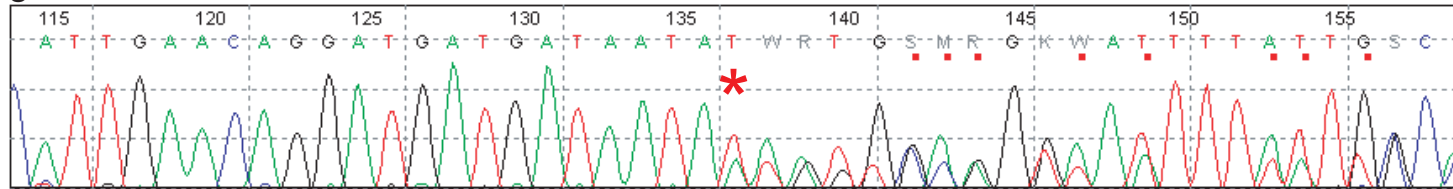

amino acid translation

Reference  
A4573

|     |   |   |   |   |     |   |   |   |   |     |   |   |   |   |
|-----|---|---|---|---|-----|---|---|---|---|-----|---|---|---|---|
| 835 | E | Q | D | D | 840 | N | N | S | A | 845 | G | Q | Q | E |
| I   | E | Q | D | D | D   | N | I | V | Q | D   | M | V | S | K |

Reference

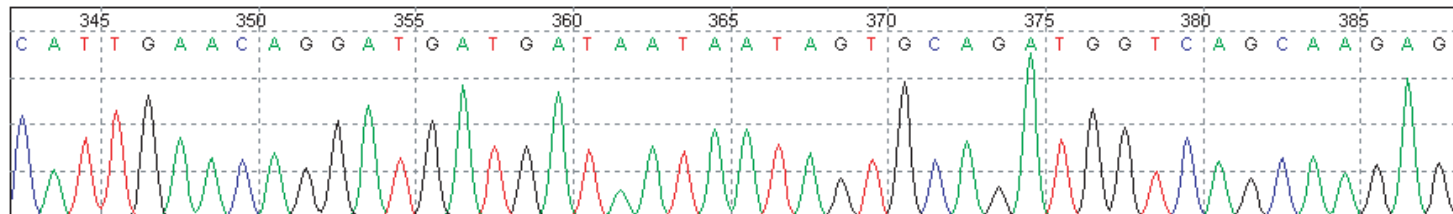

mRNA from A4573 cells

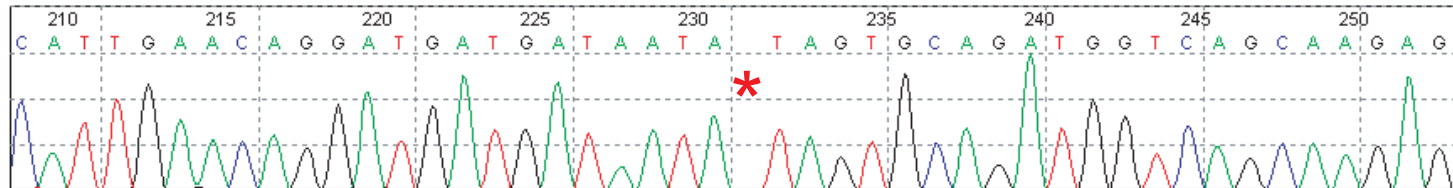



# Supplementary Figure 9

**A**

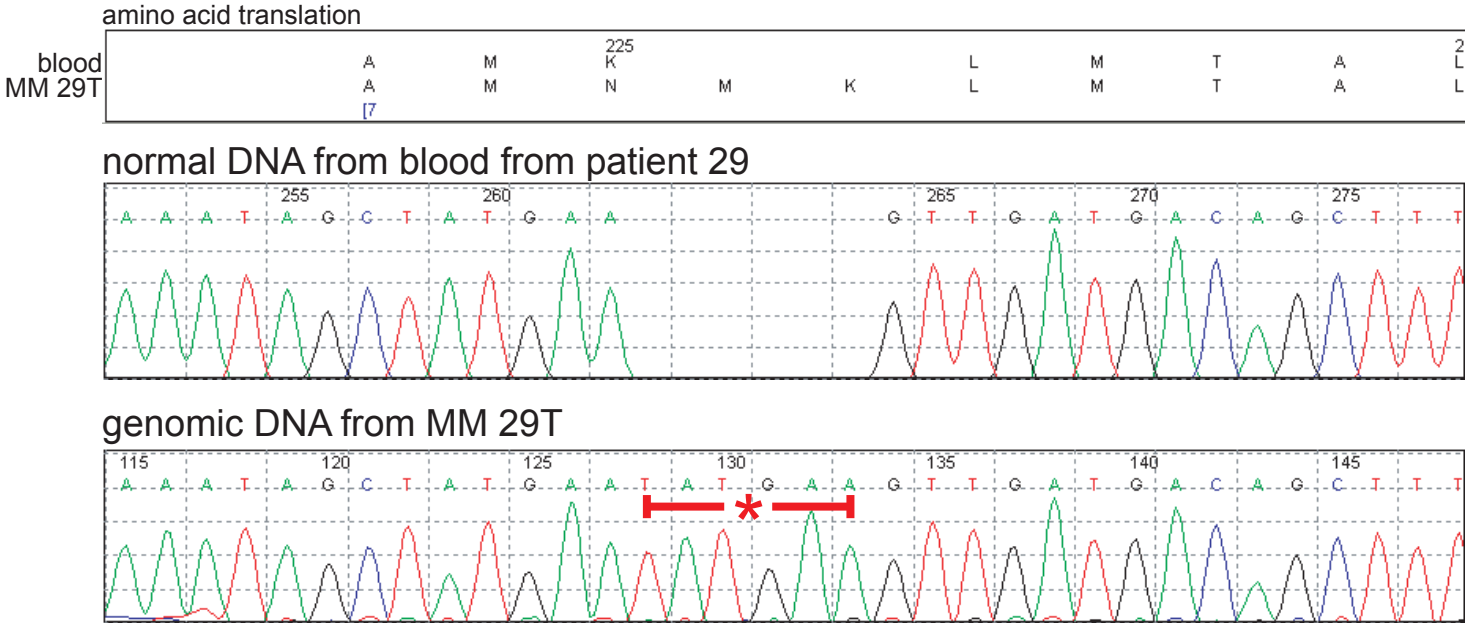

**B**

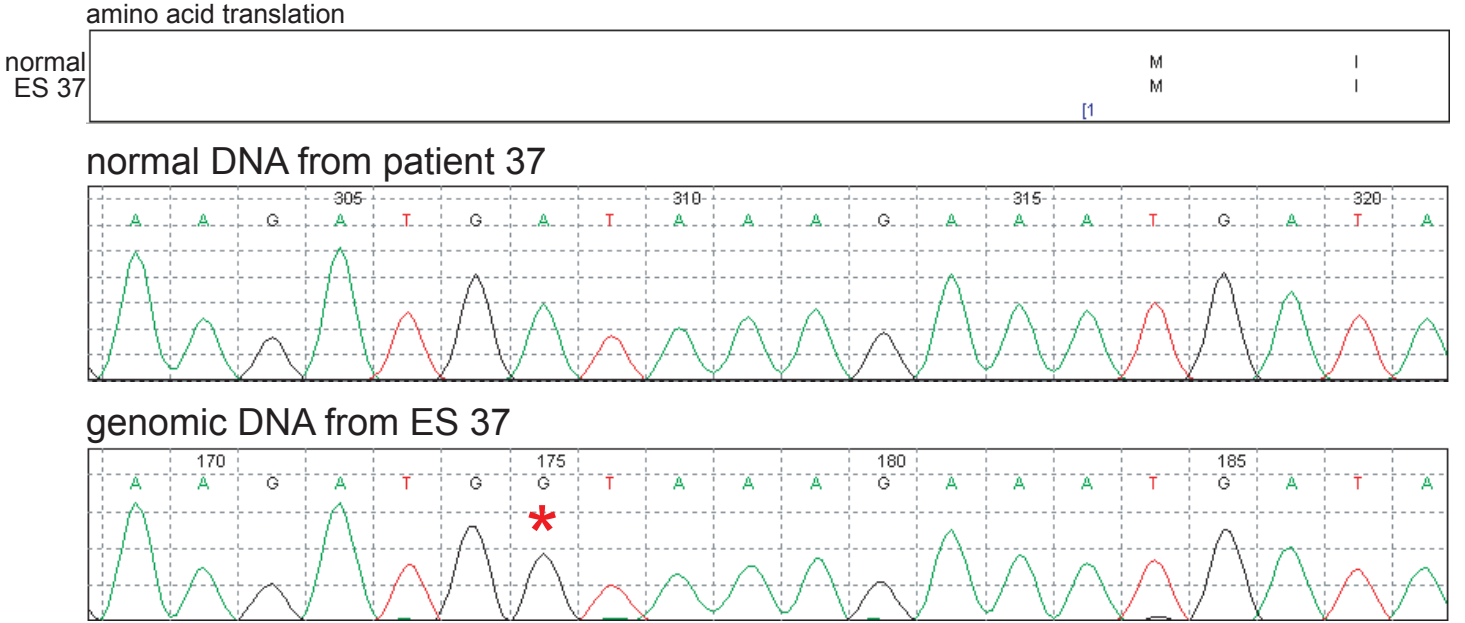



# Supplementary Figure 10

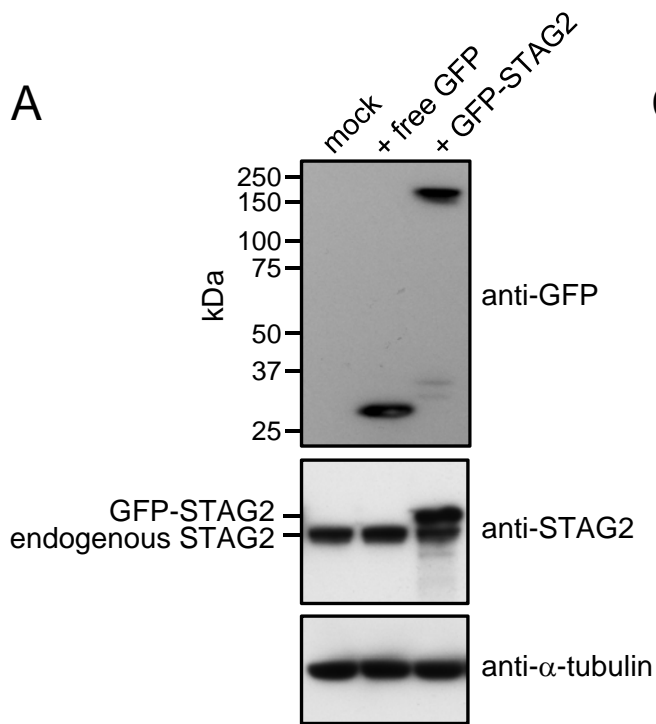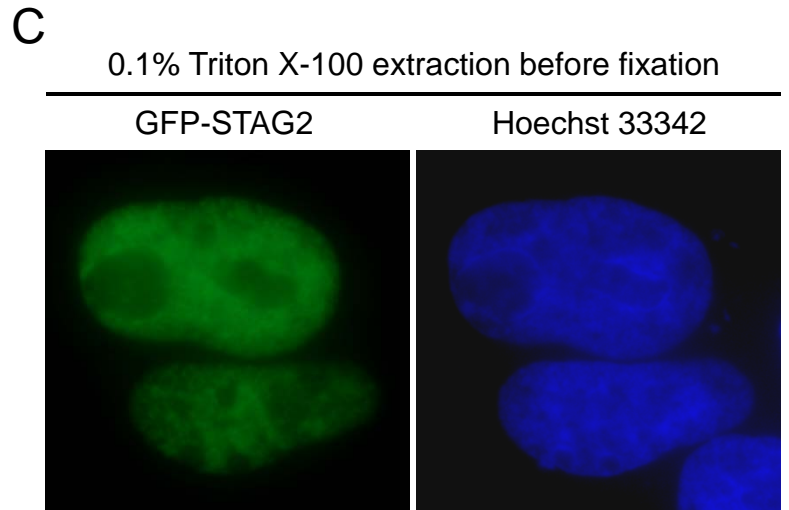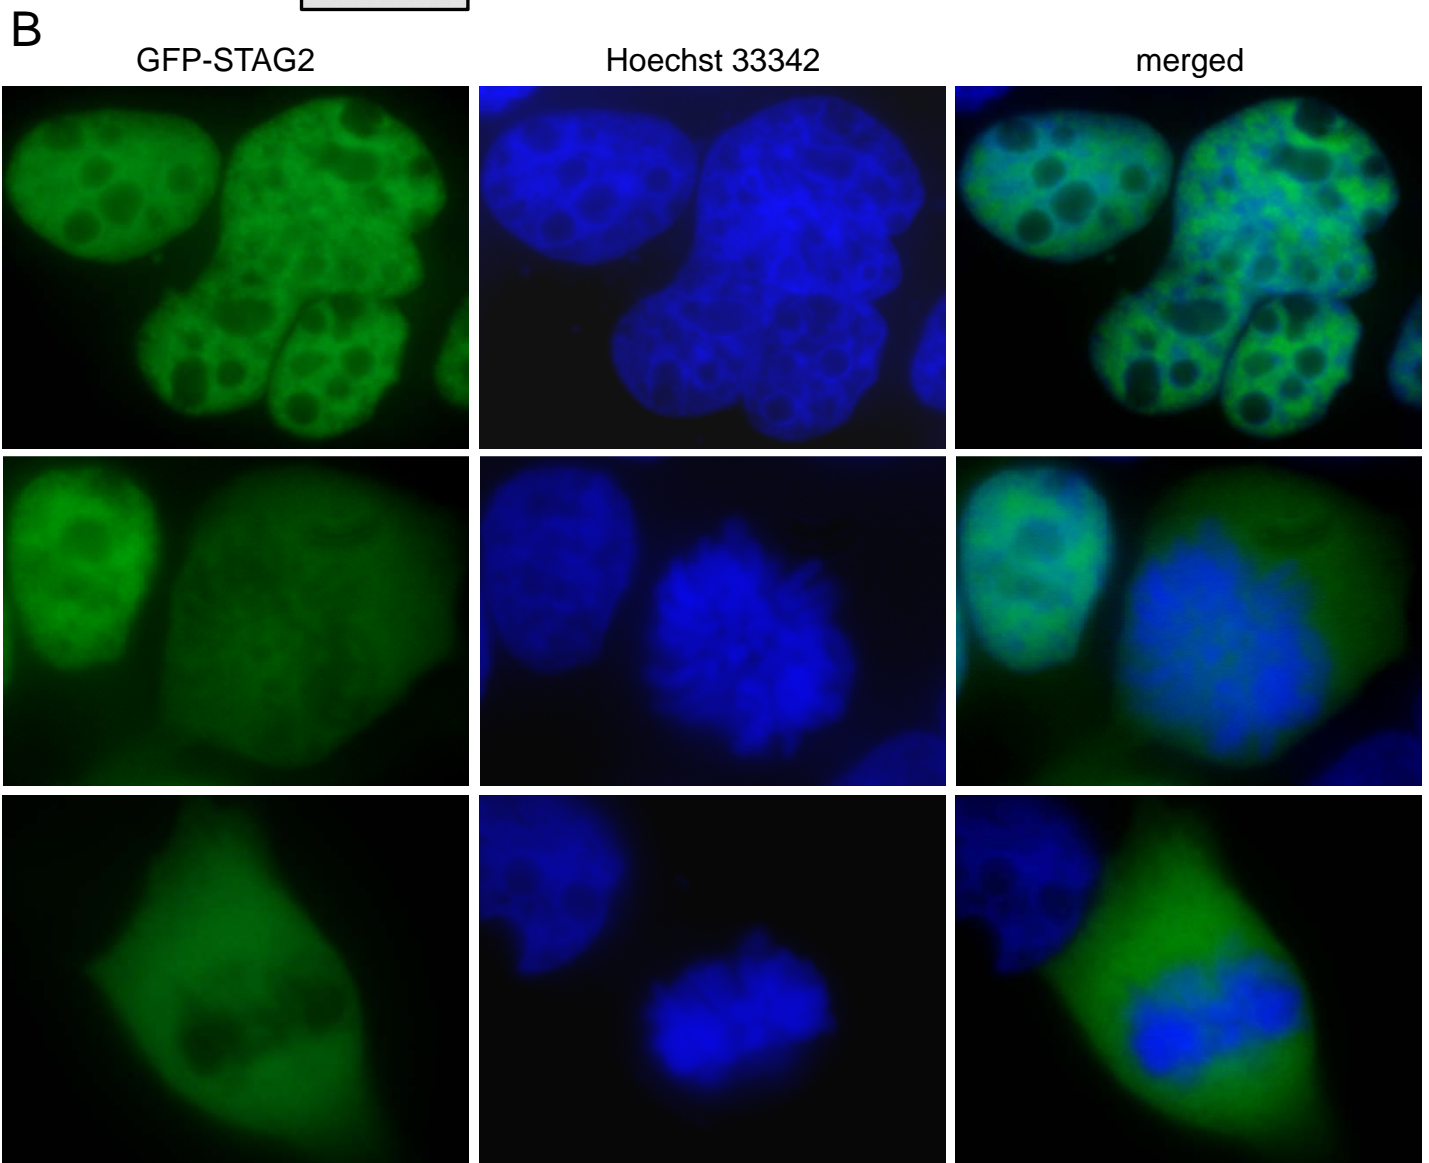

# Supplementary Figure 11A-B

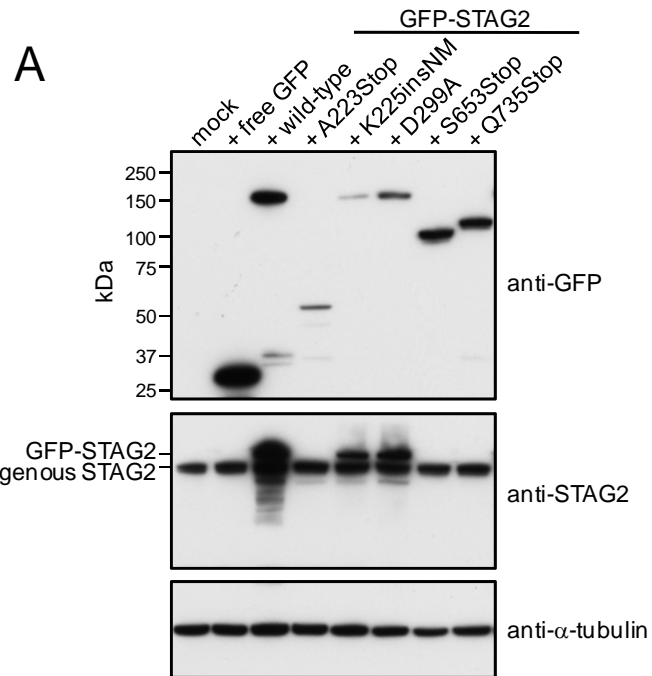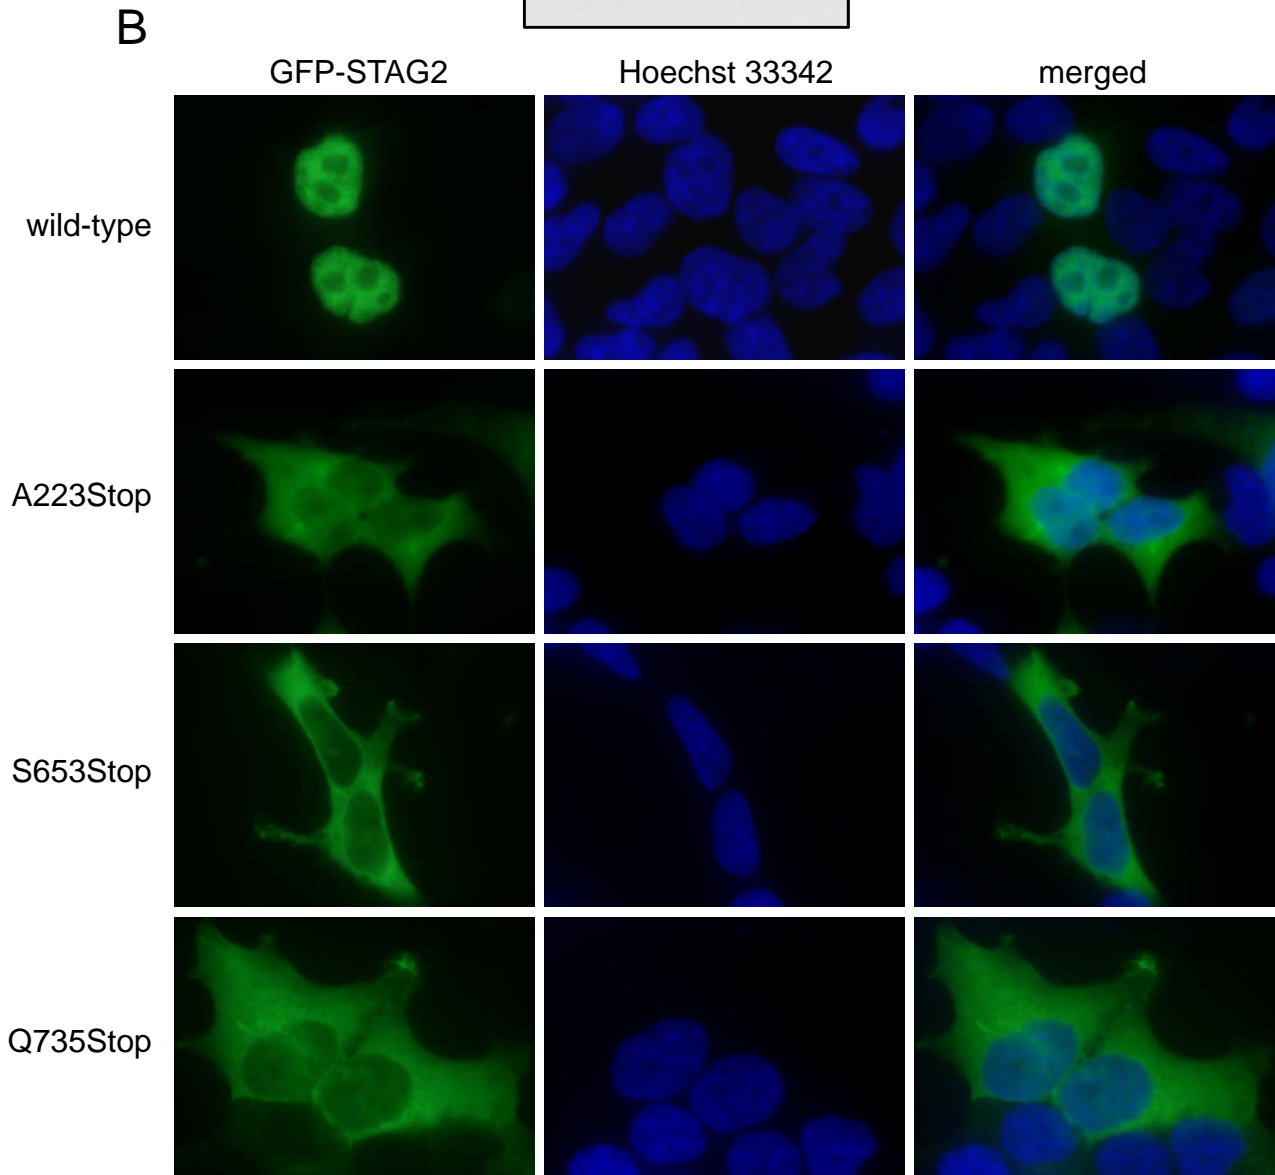

# Supplementary Figure 11C

C

0.1% Triton X-100 extraction before fixation

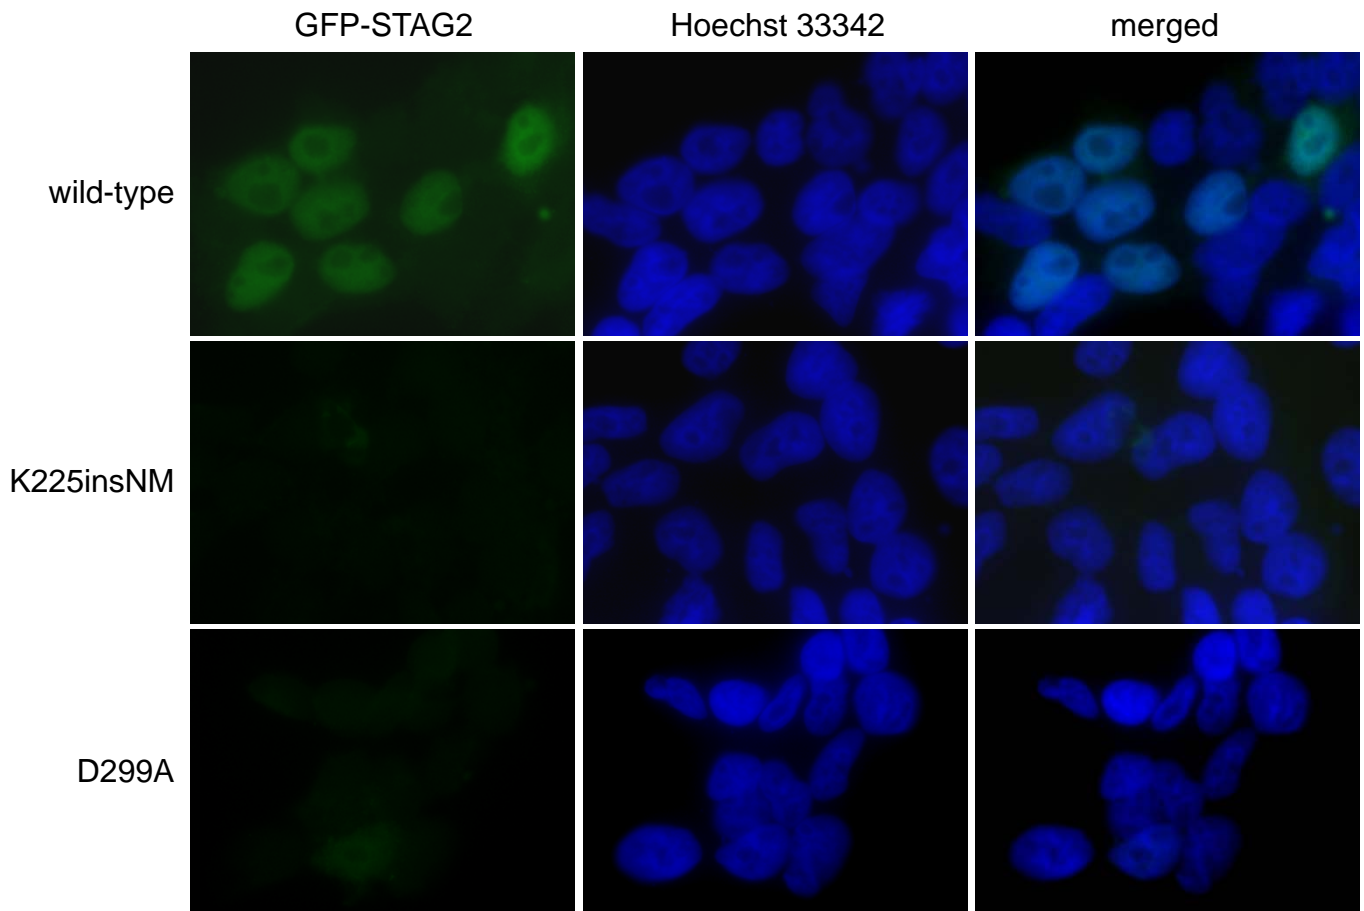

# Supplementary Figure 12A-B

A

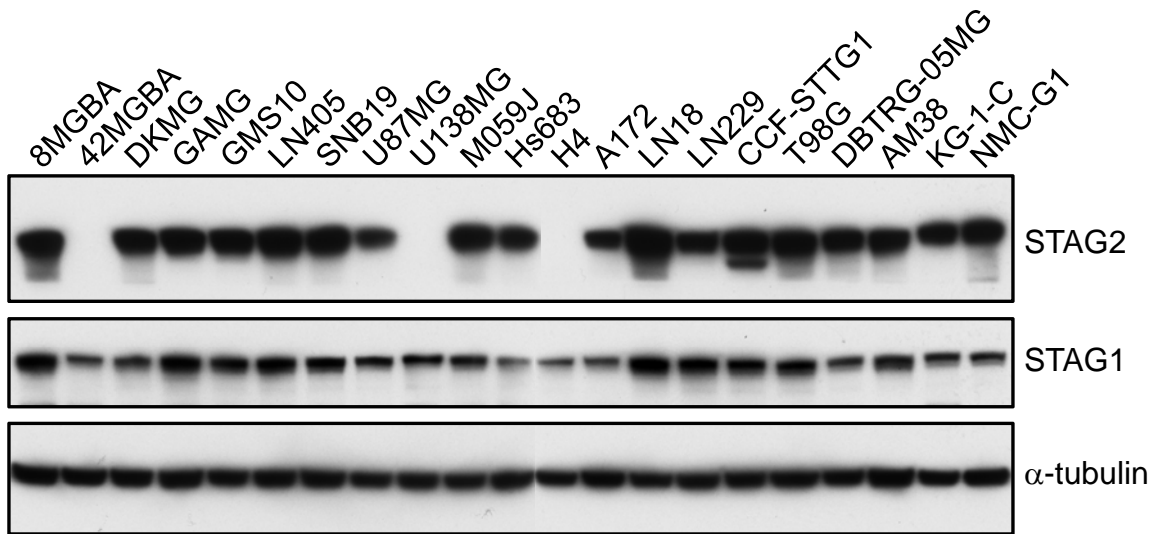

B

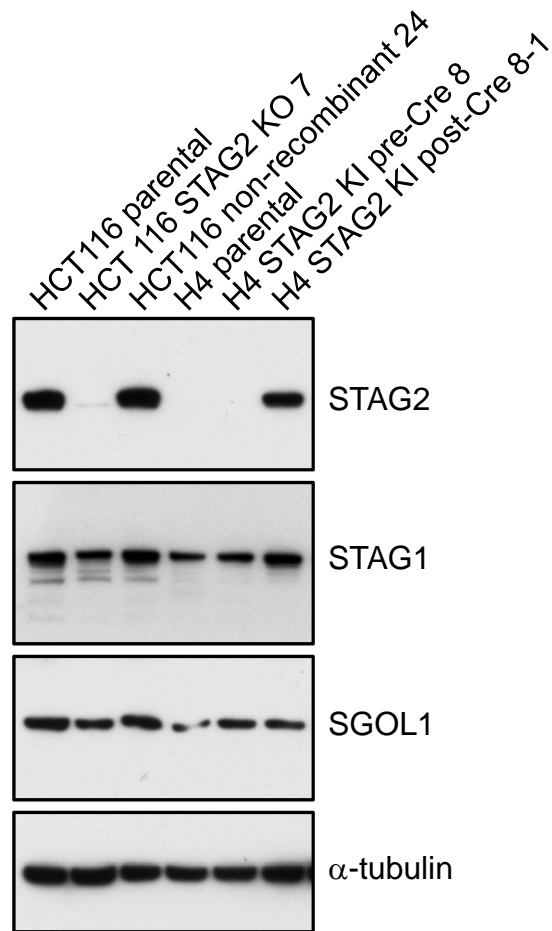

## Supplementary Figure 12C

C

| Gene ID | Gene name                                    | Fold change in mRNA expression level |                 |                 |
|---------|----------------------------------------------|--------------------------------------|-----------------|-----------------|
|         |                                              | H4 STAG2 KI                          | 42MGBA STAG2 KI | HCT116 STAG2 KO |
| STAG2   | Stromal antigen 2                            | 4.35                                 | 1.17            | -5.97           |
| STAG1   | Stromal antigen 1                            | -1.23                                | -1.13           | 1.12            |
| STAG3   | Stromal antigen 3                            | -1.02                                | -1.06           | 1.03            |
| SMC1A   | Structural maintenance of chromosomes 1A     | 1.13                                 | -1.06           | -1.10           |
| SMC1B   | Structural maintenance of chromosomes 1B     | -1.01                                | -1.14           | 1.09            |
| SMC3    | Structural maintenance of chromosomes 3      | 1.16                                 | 1.09            | 1.02            |
| RAD21   | Rad21 homolog                                | 1.05                                 | 1.05            | 1.07            |
| NIPBL   | Nipped-B homolog                             | 1.10                                 | -1.09           | 1.25            |
| PTTG1   | Securin, Pituitary tumor transforming gene 1 | 1.05                                 | -1.02           | -1.08           |
| ESCO1   | Establishment of cohesion 1 homolog          | -1.03                                | -1.02           | 1.18            |
| ESPL1   | Separase, Extra spindle poles-like 1         | 1.26                                 | 1.02            | -1.05           |
| PLK1    | Polo-like kinase 1                           | -1.04                                | 1.17            | 1.01            |
| PDS5A   | Regulator of cohesion maintenance homolog A  | 1.07                                 | -1.01           | -1.08           |
| PDS5B   | Regulator of cohesion maintenance homolog B  | 1.03                                 | -1.04           | 1.04            |
| WAPAL   | Wings apart-like homolog                     | 1.00                                 | -1.00           | -1.08           |
| CDCA5   | Sororin, Cell division cycle associated 5    | -1.00                                | 1.15            | -1.19           |
| SGOL1   | Shugoshin-like 1                             | 1.12                                 | 1.13            | 1.13            |
| SGOL2   | Shugoshin-like 2                             | 1.13                                 | -1.07           | 1.16            |

Supplementary Figure 13

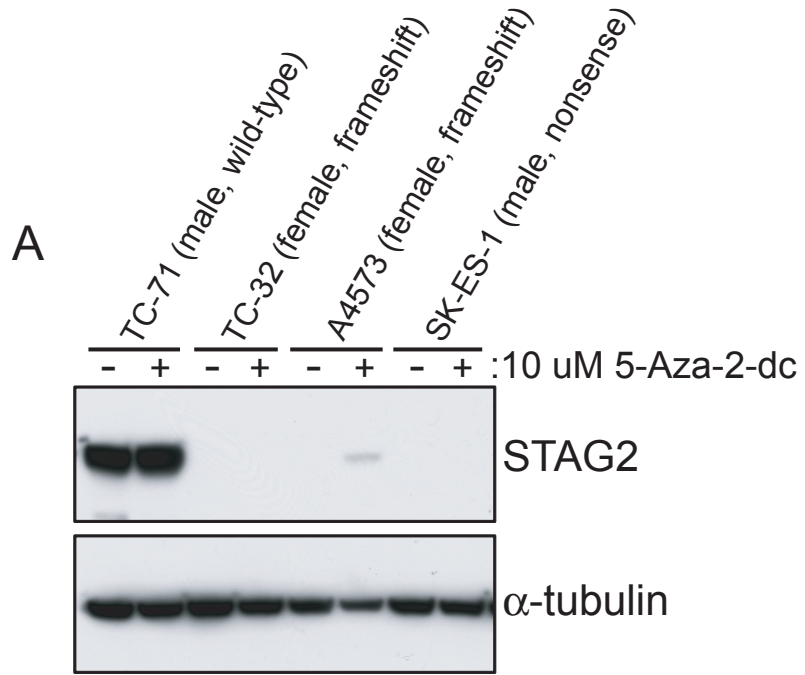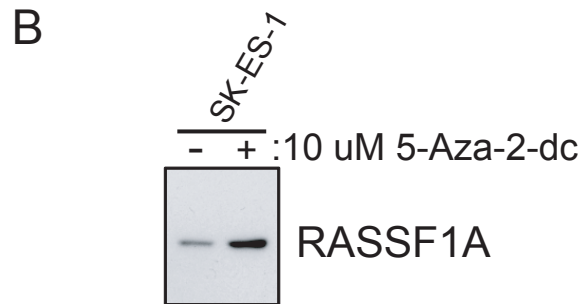



# Supplementary Figure 14

A

H4 non-recombinant clone 10

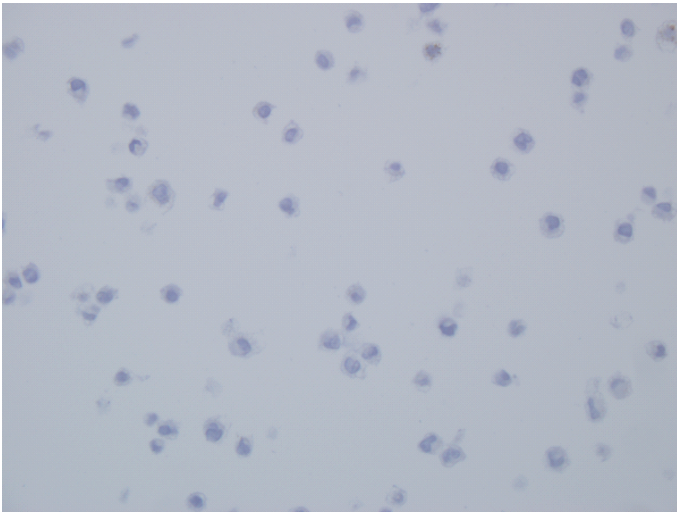

H4 STAG2 KI post-Cre clone 8-1

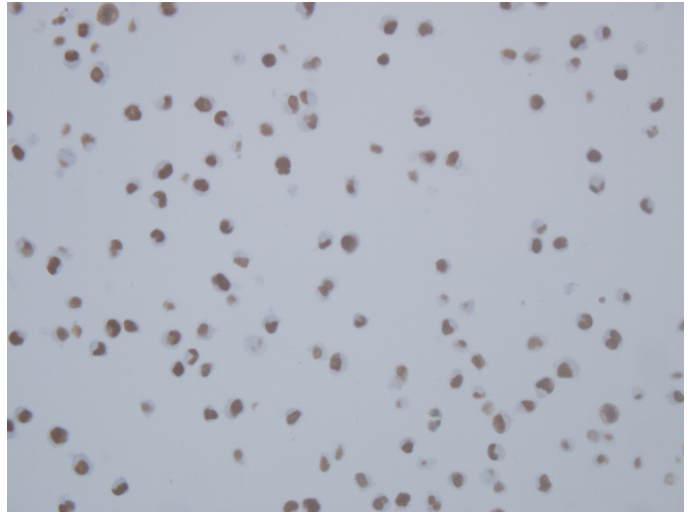

B

42MGBA cells

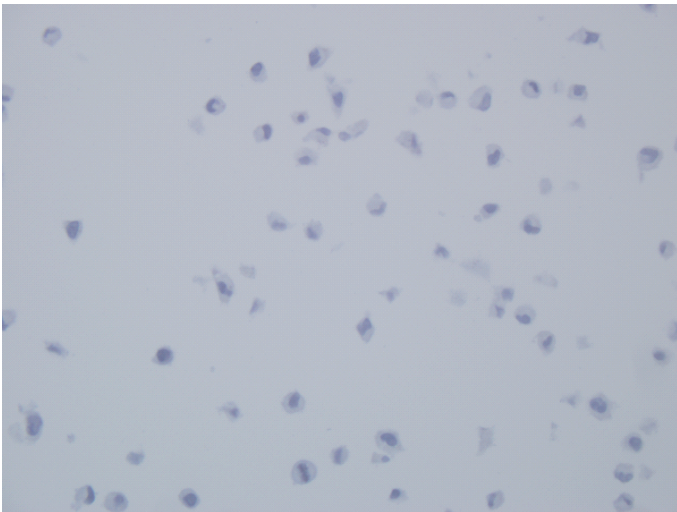

# Supplementary Figure 15

**A**

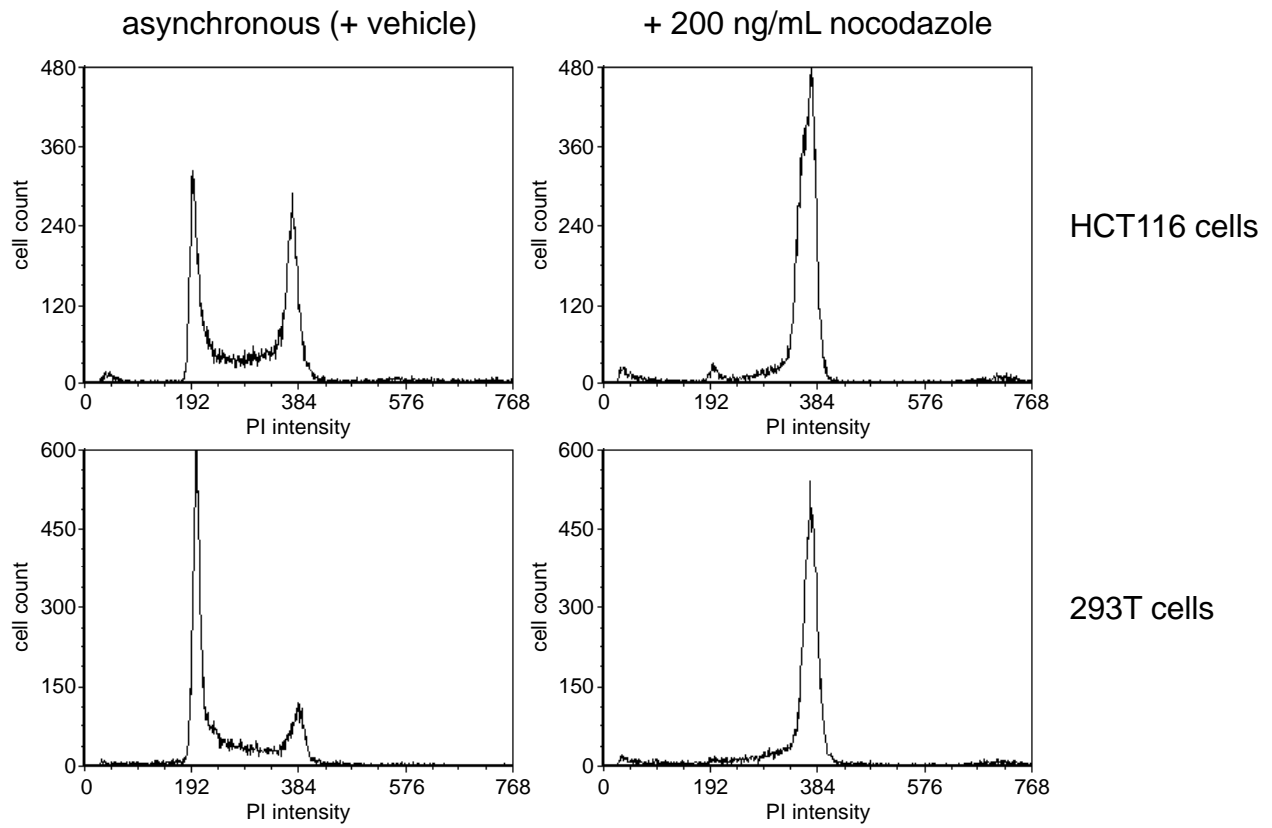

**B**

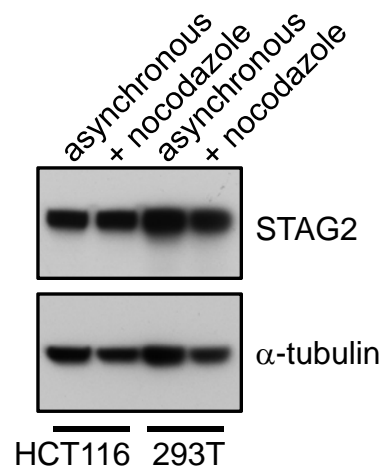



Supplementary Figure 16

STAG2

$\alpha$ -tubulin

appendix

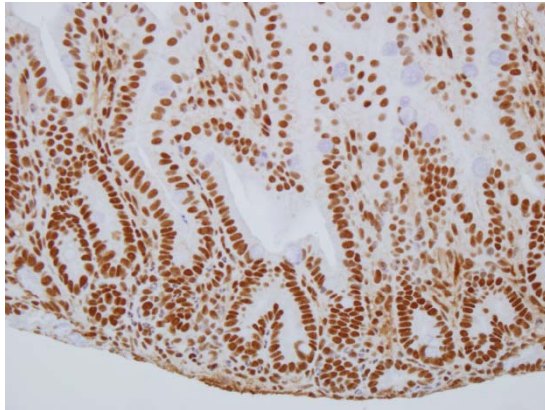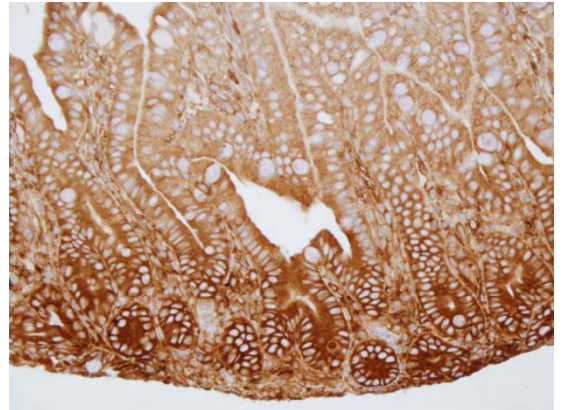

lymph node

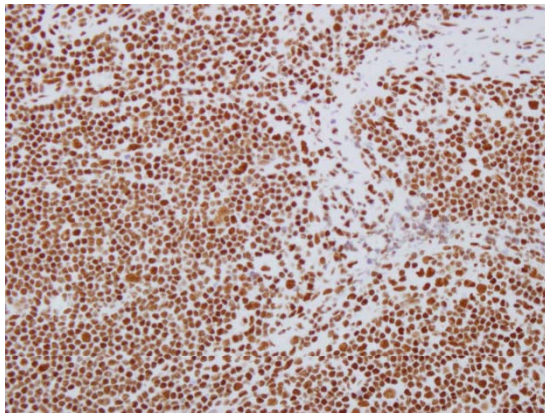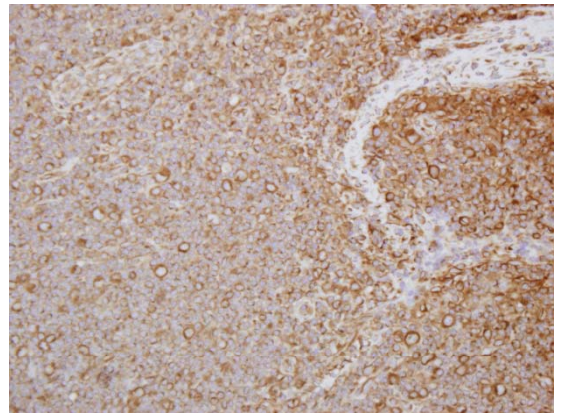

skeletal muscle

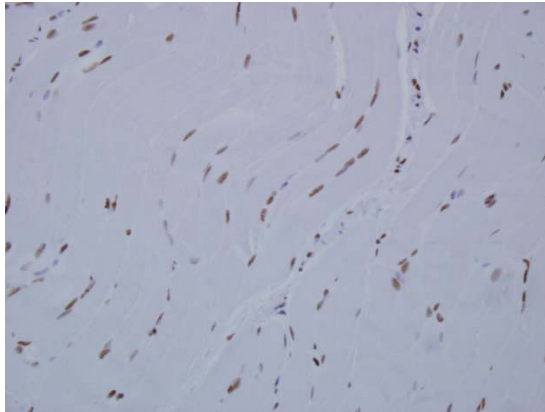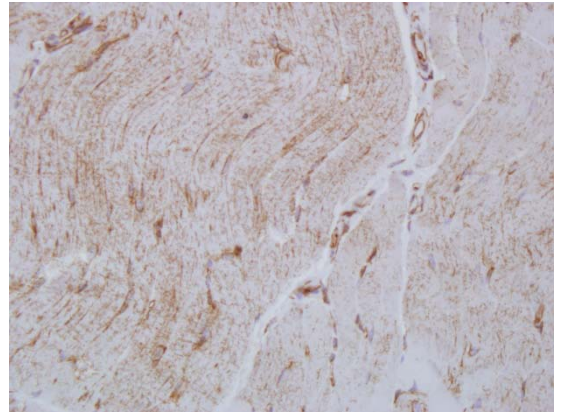

thymus

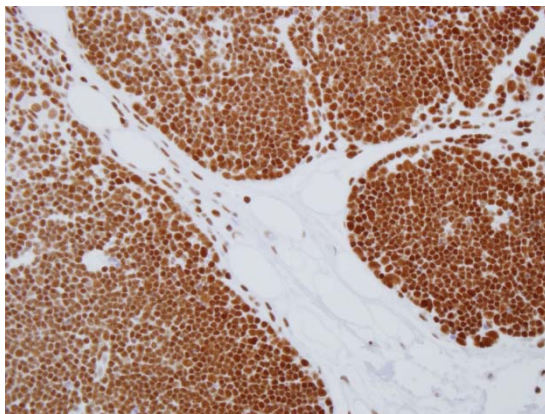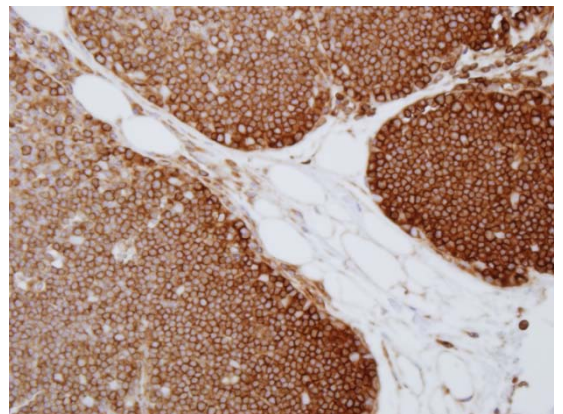



Supplementary Figure 16 continued

STAG2

$\alpha$ -tubulin

skin

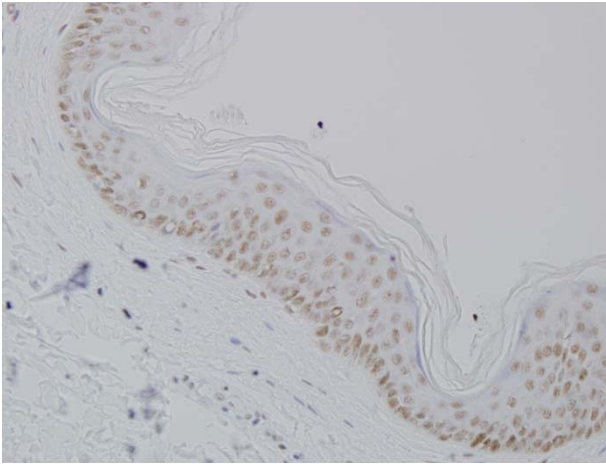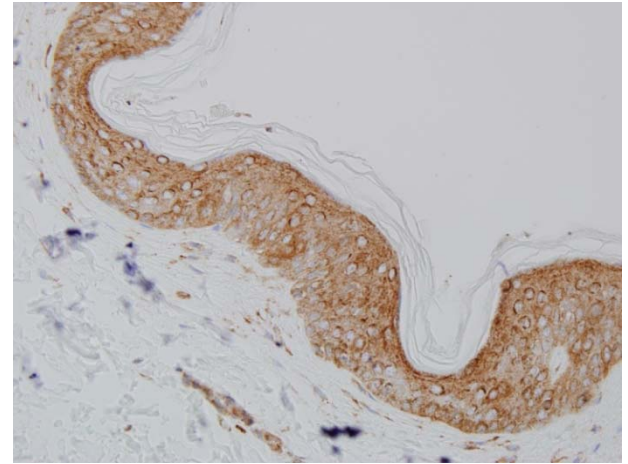

skin

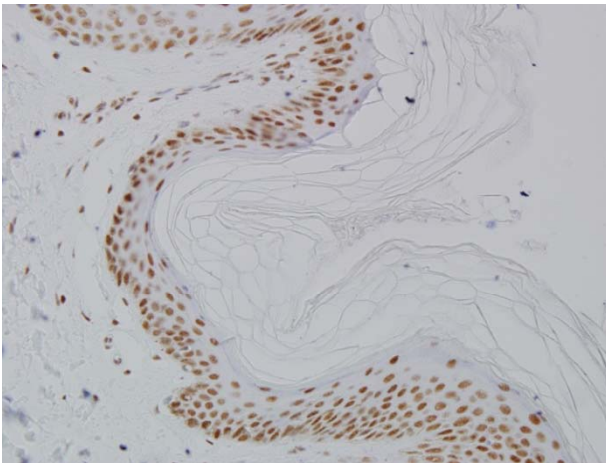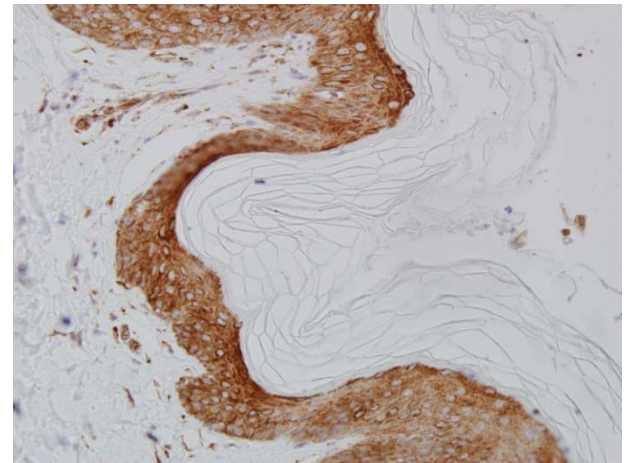

## Supplementary Table 2

| Tumor ID      | Tissue array  | Source                    | Pathology                | Tissue site          | Patient sex | Age at dx | # of replicate cores on TMA w/ STAG2 loss | Intratumoral heterogeneity of STAG2 loss |
|---------------|---------------|---------------------------|--------------------------|----------------------|-------------|-----------|-------------------------------------------|------------------------------------------|
| A7/A8         | GL806         | US Biomax                 | glioblastoma multiforme  | cerebrum             | M           | 20        | 2                                         | no                                       |
| B7/B8         | GL806         | US Biomax                 | glioblastoma multiforme  | cerebrum             | F           | 31        | 2                                         | no                                       |
| C9/C10        | GL806         | US Biomax                 | glioblastoma multiforme  | cerebrum             | M           | 44        | 2                                         | no                                       |
| E7/E8         | GL806         | US Biomax                 | glioblastoma multiforme  | cerebrum             | M           | 40        | 2                                         | no                                       |
| F1/F2         | GL806         | US Biomax                 | glioblastoma multiforme  | cerebrum             | F           | 41        | 2                                         | no                                       |
| F9/F10        | GL806         | US Biomax                 | glioblastoma multiforme  | cerebrum             | M           | 50        | 2                                         | no                                       |
| D9/D10        | ME1002        | US Biomax                 | melanoma                 | perianal skin        | F           | 47        | 2                                         | no                                       |
| E1/E2         | ME1002        | US Biomax                 | melanoma                 | skin (heel)          | M           | 62        | 2                                         | no                                       |
| F5/F6         | ME1002        | US Biomax                 | melanoma                 | vulva                | F           | 52        | 2                                         | no                                       |
| G1/G2         | ME1002        | US Biomax                 | melanoma                 | skin (back)          | M           | 36        | 2                                         | no                                       |
| G7/G8         | ME1002        | US Biomax                 | melanoma                 | dorsum of foot       | M           | 35        | 2                                         | no                                       |
| H5/H6         | ME1002        | US Biomax                 | melanoma                 | perianal skin        | M           | 45        | 2                                         | no                                       |
| H9/H10        | ME1002        | US Biomax                 | melanoma                 | vulva                | F           | 45        | 2                                         | no                                       |
| A11/B11       | LY1501        | US Biomax                 | lymphoma, diffuse B-cell | left neck            | F           | 48        | 2                                         | yes                                      |
| B4/B5/B6      | BC17012       | US Biomax                 | medulloblastoma          | brain, 4th ventricle | M           | 11        | 3                                         | no                                       |
| CA7/DA7       | CO1922        | US Biomax                 | adenocarcinoma           | colon                | M           | 37        | 2                                         | no                                       |
| CD1/DD1       | CO1922        | US Biomax                 | adenocarcinoma           | colon                | F           | 66        | 2                                         | no                                       |
| A2/D4/F4      | ES-1          | Marc Ladanyi              | Ewing's sarcoma          | abdominal wall       | F           | 72        | 3                                         | no                                       |
| A3/B3/C3      | ES-1          | Marc Ladanyi              | Ewing's sarcoma          | lumbar spine         | M           | 25        | 3                                         | no                                       |
| D2/E2/F2      | ES-1          | Marc Ladanyi              | Ewing's sarcoma          | pubis                | F           | 21        | 3                                         | no                                       |
| D8/E8/F8      | ES-1          | Marc Ladanyi              | Ewing's sarcoma          | tibia                | M           | 15        | 3                                         | no                                       |
| G4/H4/I4      | ES-1          | Marc Ladanyi              | Ewing's sarcoma          | shoulder             | F           | 30        | 3                                         | no                                       |
| H6/I6         | ES-1          | Marc Ladanyi              | Ewing's sarcoma          | fibula               | M           | 10        | 2                                         | no                                       |
| G11/H11/I11   | ES-1          | Marc Ladanyi              | Ewing's sarcoma          | leg                  | F           | 34        | 3                                         | yes                                      |
| 2004-06-P0309 | 3000-30-P8798 | Children's Oncology Group | Ewing's sarcoma          | right chest          | F           | 17        | 3                                         | no                                       |
| 97-06-P046    | 3000-30-P8798 | Children's Oncology Group | Ewing's sarcoma          | rib                  | M           | 14        | 1                                         | yes                                      |
| 2005-09-P0748 | 3000-30-P8798 | Children's Oncology Group | Ewing's sarcoma          | pelvis               | M           | 22        | 5                                         | no                                       |
| 97-08-P076    | 3000-30-P8798 | Children's Oncology Group | Ewing's sarcoma          | right femur          | M           | 11        | 1                                         | no                                       |

| <b>Evidence for somatic nature of STAG2 loss</b>                                                     |
|------------------------------------------------------------------------------------------------------|
| Adjacent normal brain on original tumor block is STAG2 positive.                                     |
| Admixed non-neoplastic perivascular endothelial cells are STAG2 positive.                            |
| Admixed non-neoplastic lymphocytes are STAG2 positive.                                               |
|                                                                                                      |
| Adjacent normal brain on original tumor block is STAG2 positive.                                     |
|                                                                                                      |
|                                                                                                      |
|                                                                                                      |
|                                                                                                      |
|                                                                                                      |
| Stroma and adjacent normal skin on original tumor block are STAG2 positive.                          |
| Adjacent block of non-neoplastic skin is STAG2 positive.                                             |
| Intratumoral heterogeneity.                                                                          |
| Admixed non-neoplastic perivascular endothelial cells are STAG2 positive.                            |
| Stroma and admixed non-neoplastic perivascular endothelial cells are STAG2 positive.                 |
| Stroma and admixed non-neoplastic lymphocytes and perivascular endothelial cells are STAG2 positive. |
|                                                                                                      |
| Admixed non-neoplastic perivascular endothelial cells are STAG2 positive.                            |
|                                                                                                      |
| Admixed non-neoplastic perivascular endothelial cells are STAG2 positive.                            |
|                                                                                                      |
| Stromal fibroblasts are STAG2 positive.                                                              |
| Intratumoral heterogeneity.                                                                          |
| Admixed non-neoplastic perivascular endothelial cells are STAG2 positive.                            |
| Intratumoral heterogeneity.                                                                          |
| Admixed non-neoplastic perivascular endothelial cells are STAG2 positive.                            |
| Block of non-neoplastic tissue from patient is STAG2 positive.                                       |



Supplementary Figure 17

STAG2

$\alpha$ -tubulin

glioblastoma A2  
STAG2 (+)

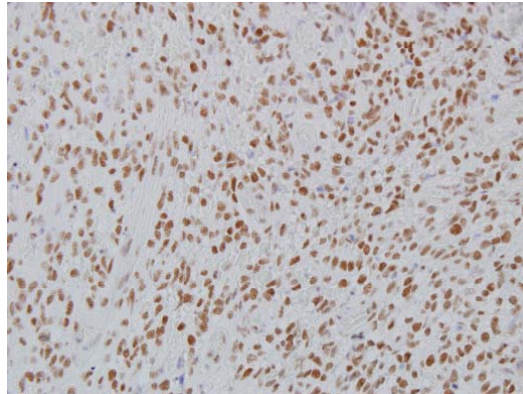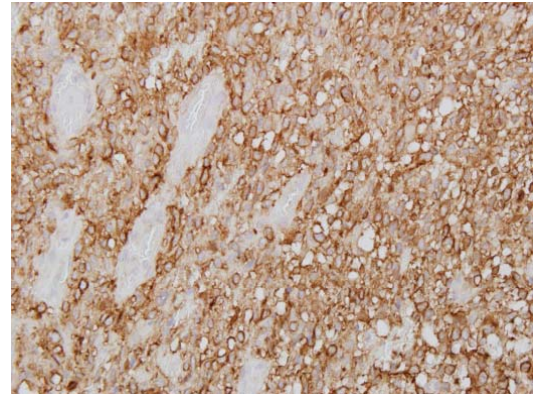

glioblastoma E10  
STAG2 (+)

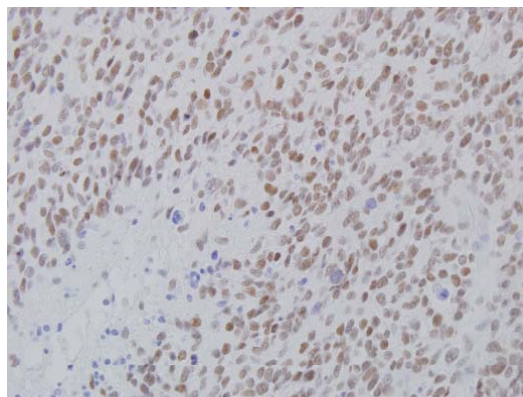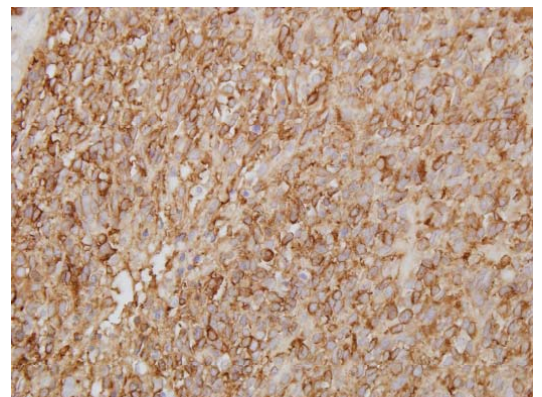

glioblastoma C10  
STAG2 (-)

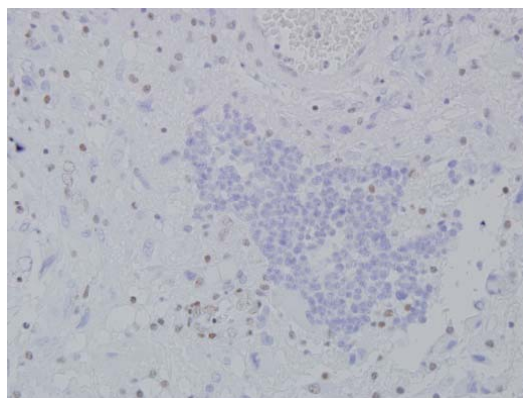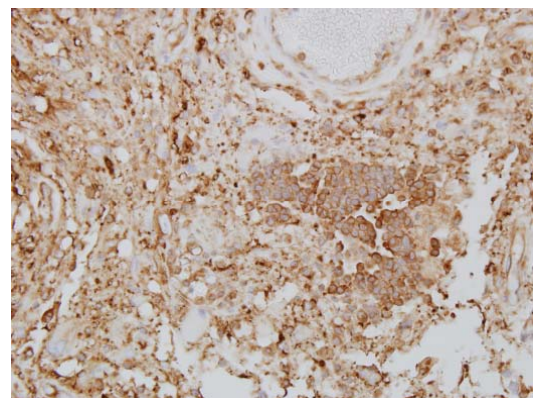

glioblastoma F2  
STAG2 (-)

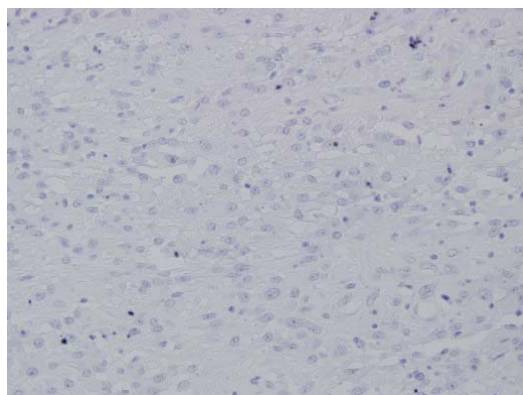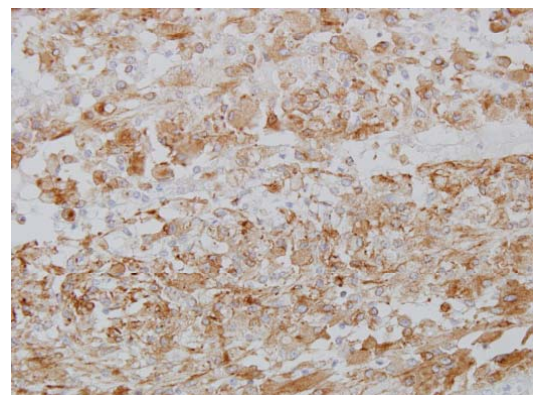



Supplementary Figure 18

STAG2

$\alpha$ -tubulin

melanoma A2  
STAG2 (+)

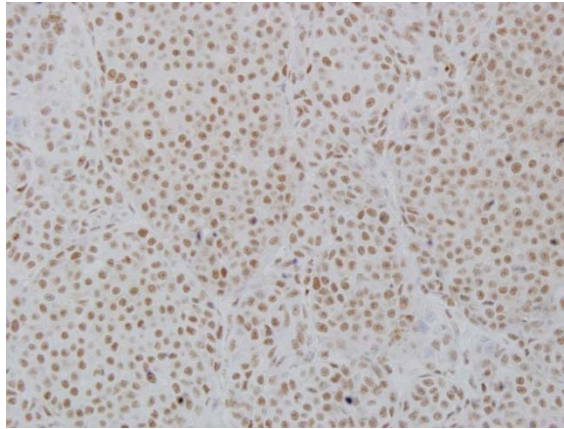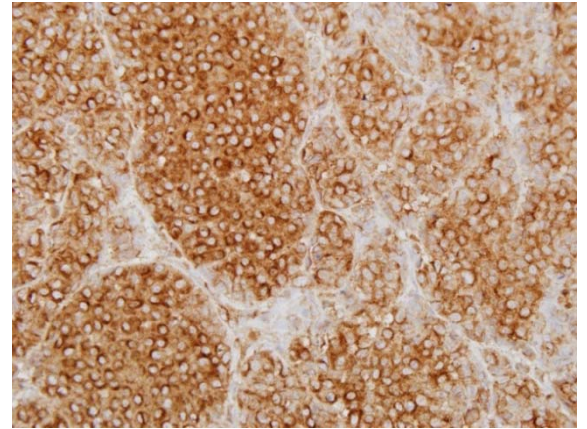

melanoma H7  
STAG2 (+)

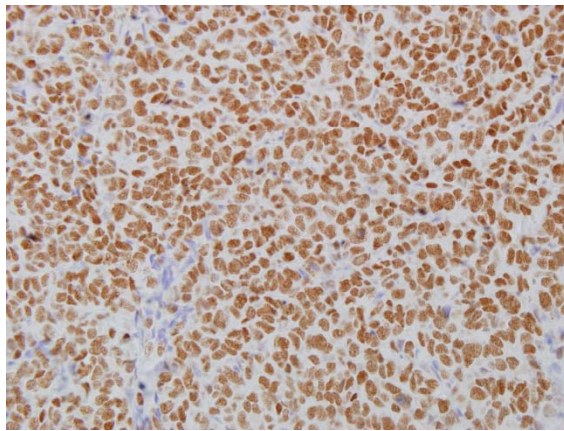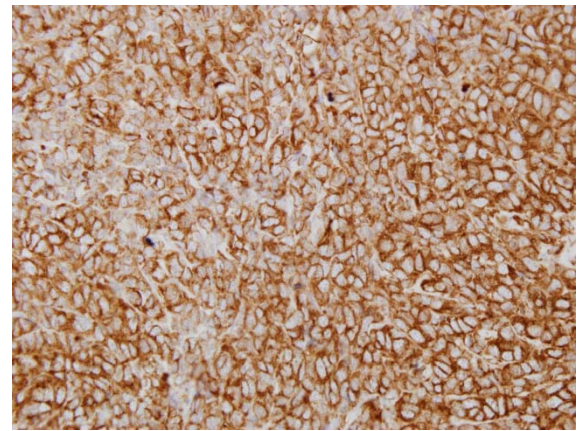

melanoma D9  
STAG2 (-)

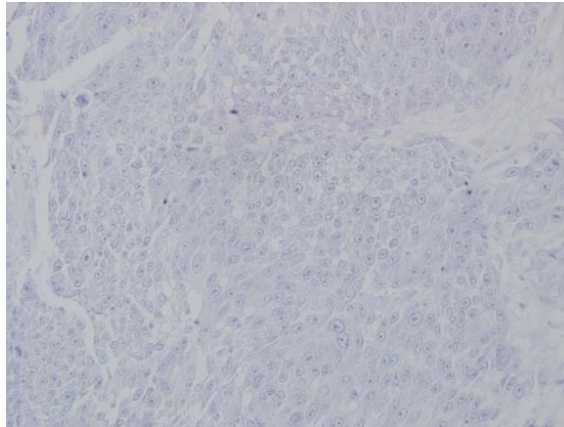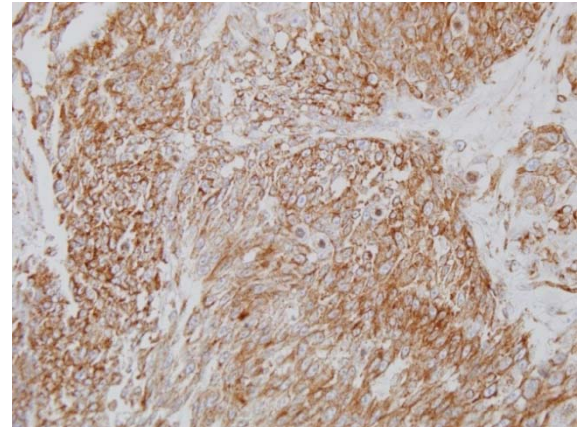

melanoma E1  
STAG2 (-)

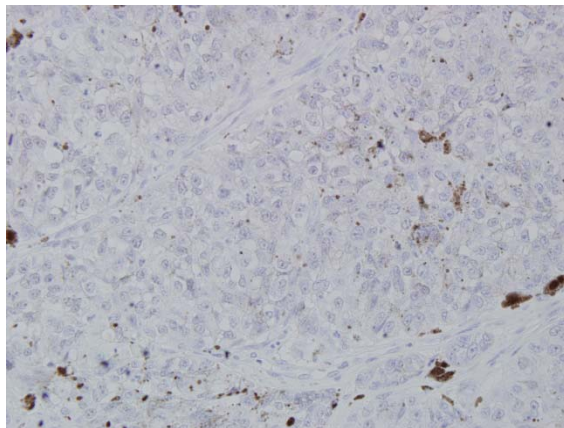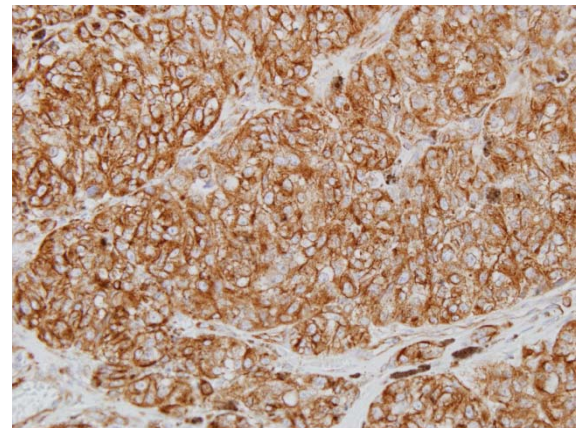



Supplementary Figure 19

STAG2

$\alpha$ -tubulin

Ewing's P0253  
STAG2 (+)

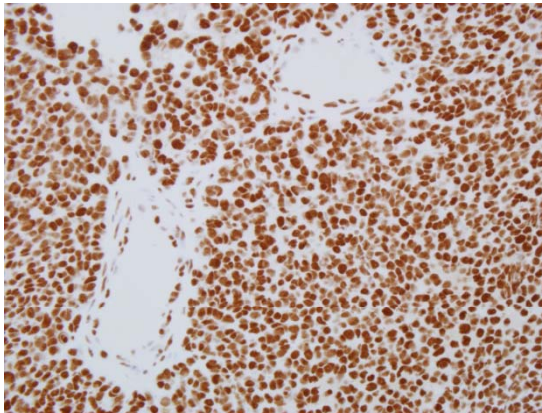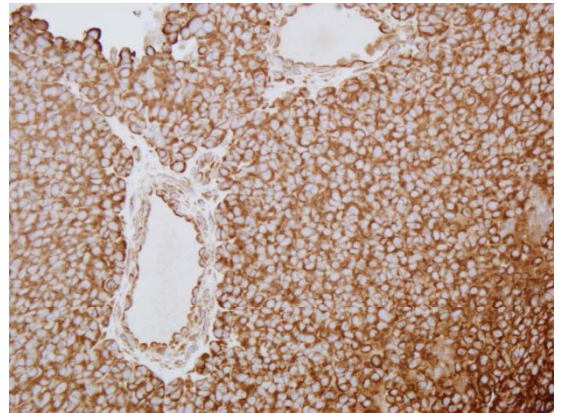

Ewing's P1013  
STAG2 (+)

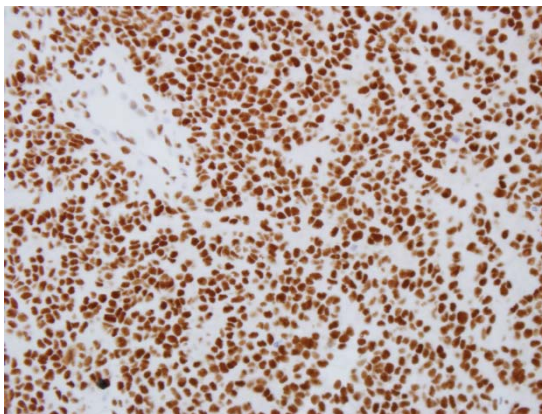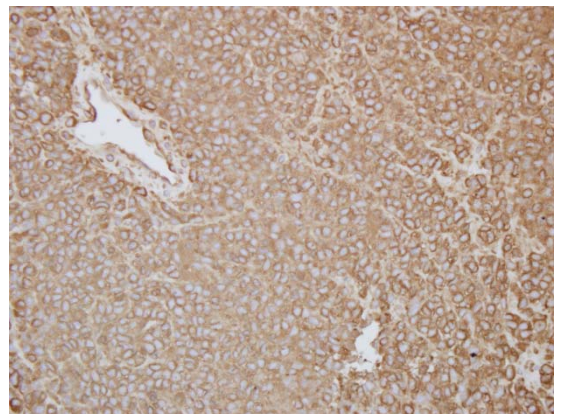

Ewing's P0309  
STAG2 (-)

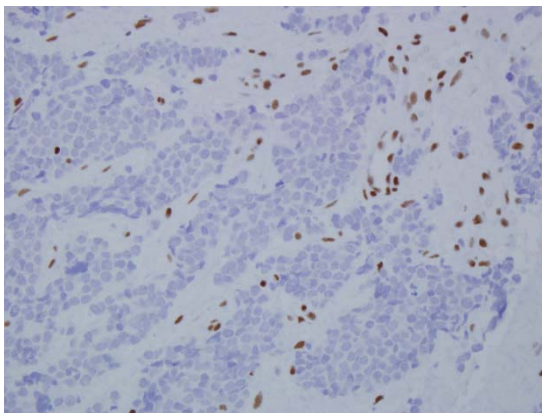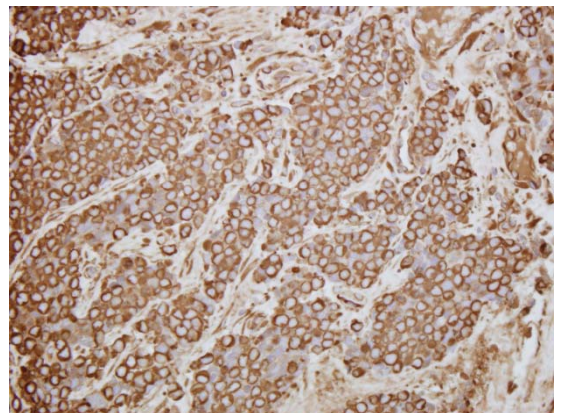

Ewing's P0748  
STAG2 (-)

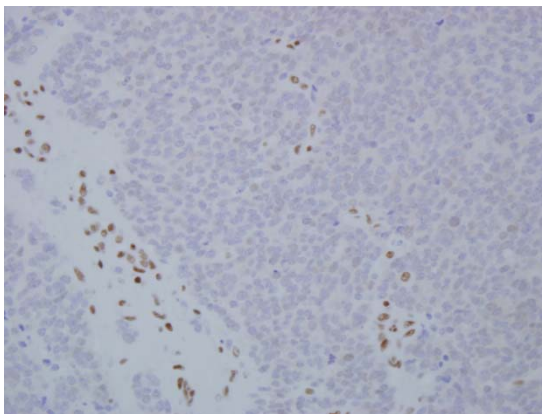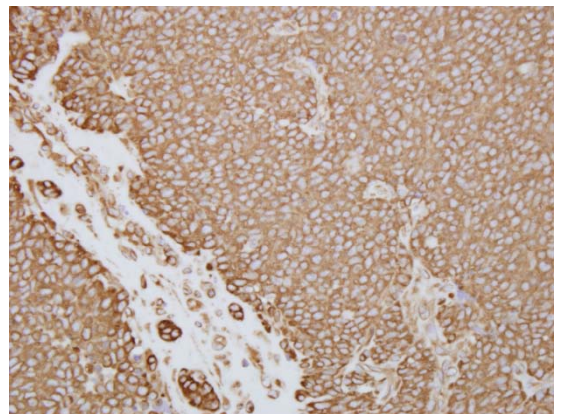



Supplementary Figure 20

STAG2

$\alpha$ -tubulin

Ewing's G11  
STAG2 (+/-)

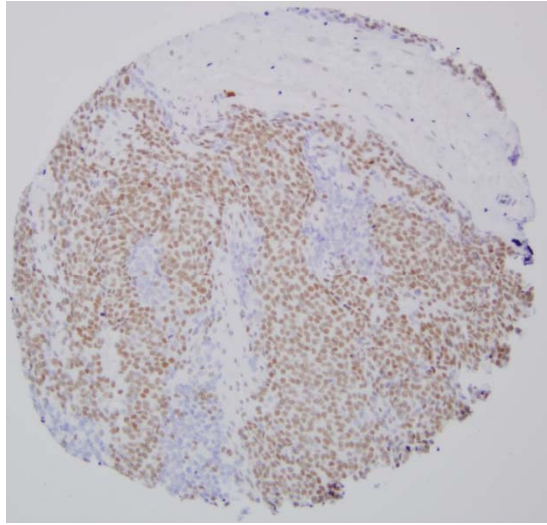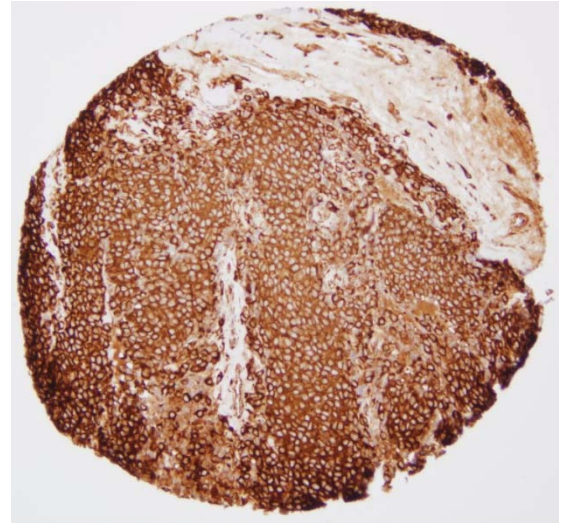

Ewing's H11  
STAG2 (+/-)

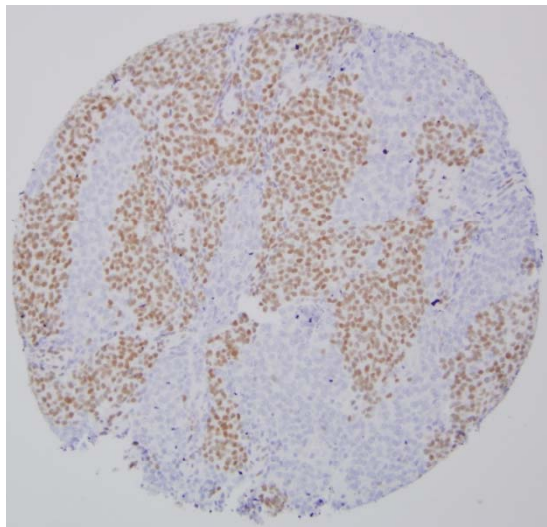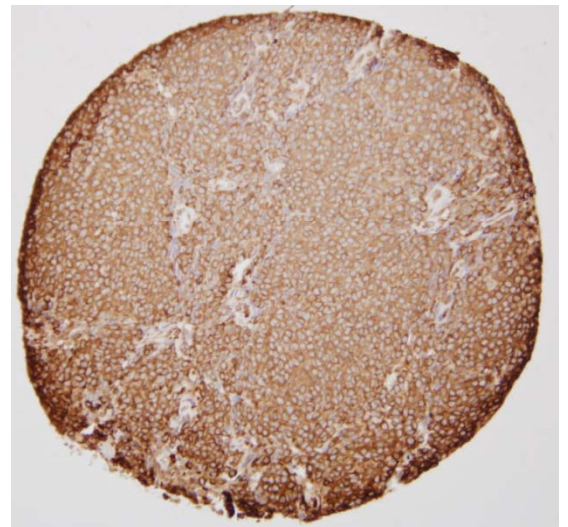



Supplementary Figure 21

STAG2

$\alpha$ -tubulin

lymphoma A2  
STAG2 (+)

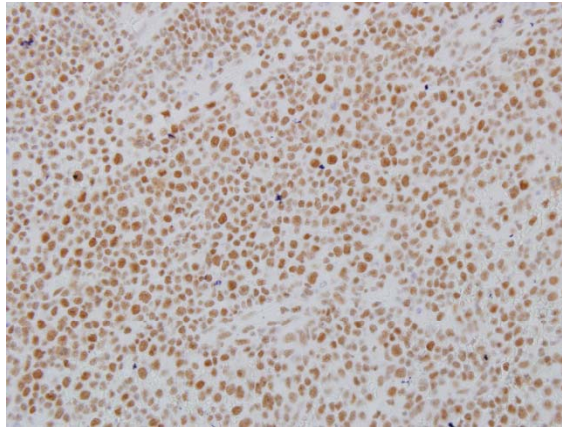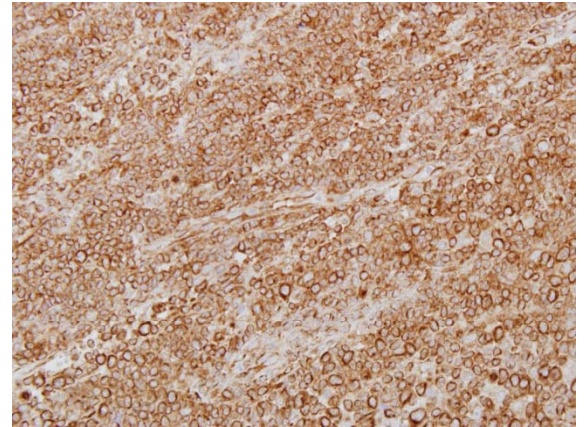

lymphoma G3  
STAG2 (+)

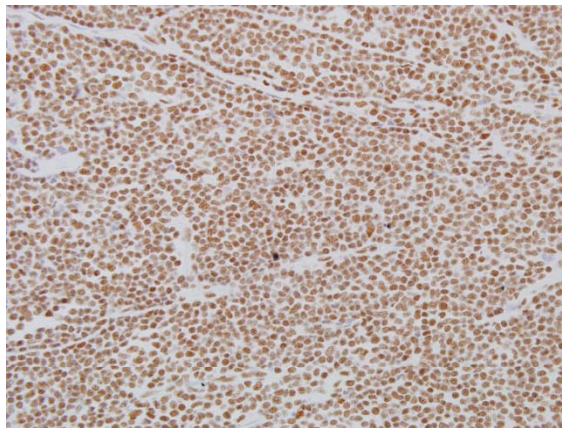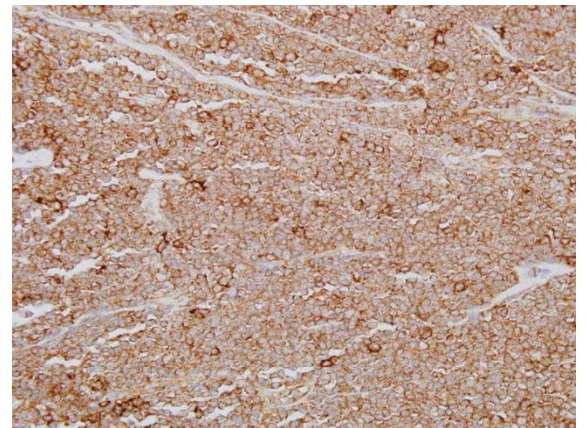

lymphoma A11  
STAG2 (+/-)

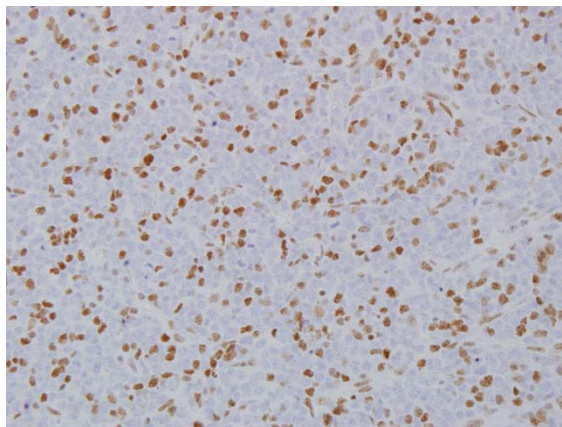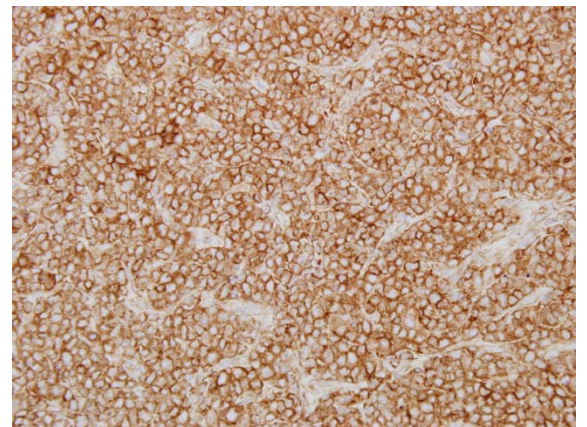

lymphoma B11  
STAG2 (+/-)

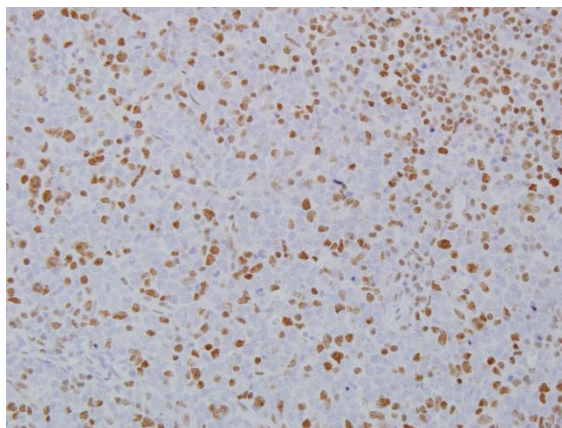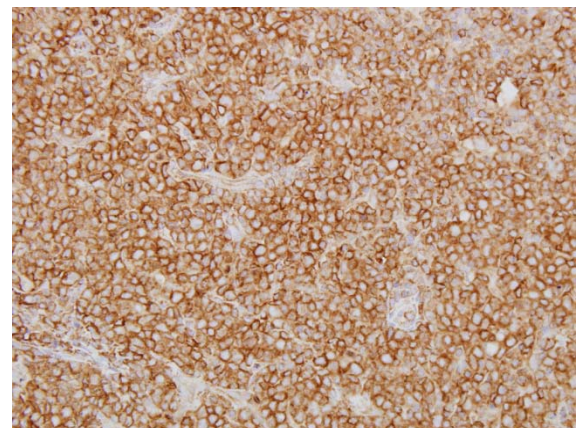



# Supplementary Figure 22

STAG2

$\alpha$ -tubulin

medulloblastoma A3  
STAG2 (+)

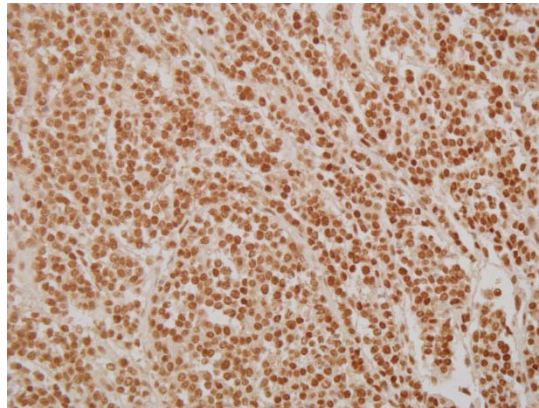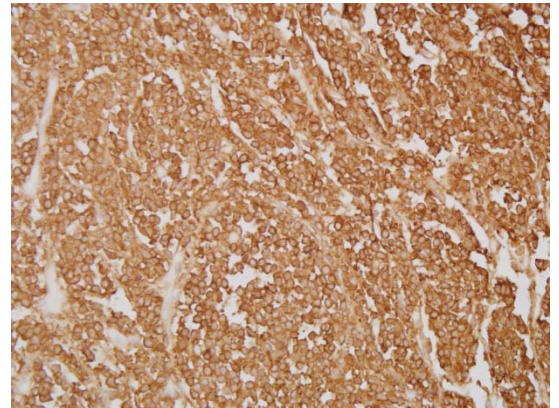

medulloblastoma D7  
STAG2 (-)

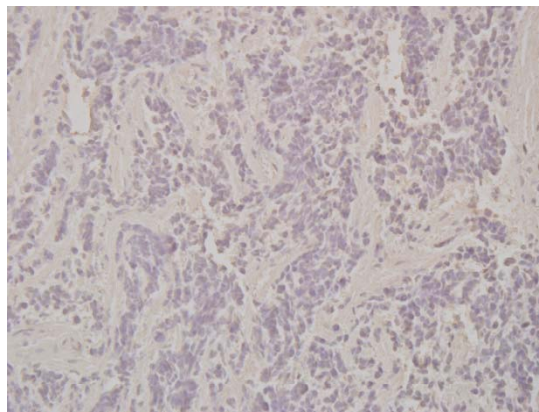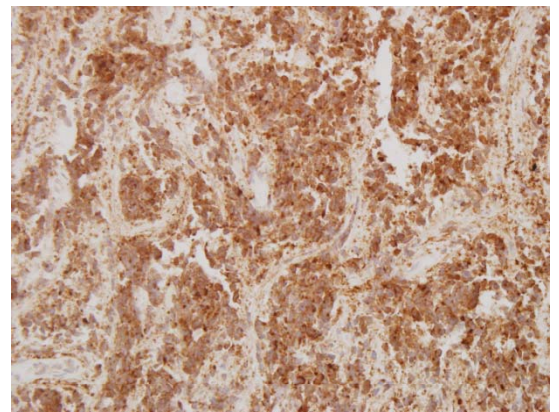



Supplementary Figure 23

STAG2

$\alpha$ -tubulin

CRC AD3  
STAG2 (+)

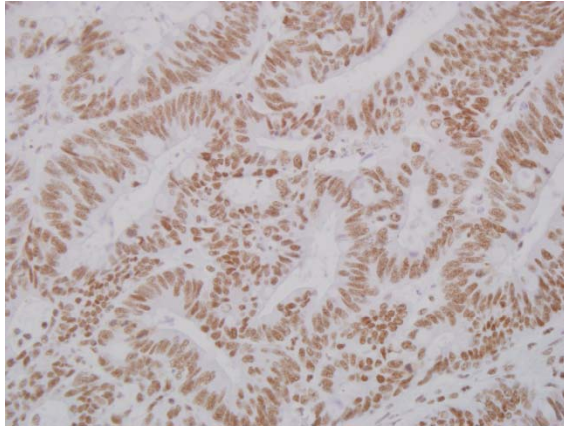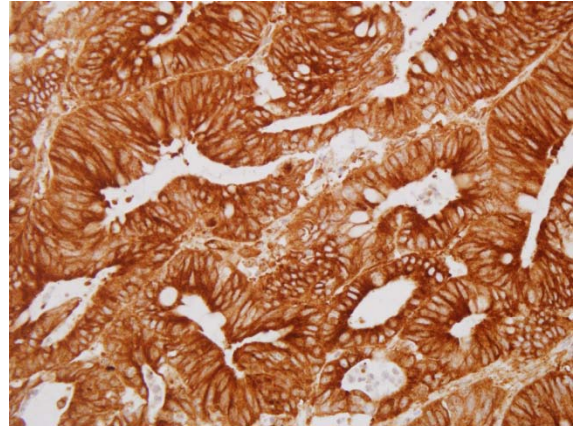

CRC DB7  
STAG2 (+)

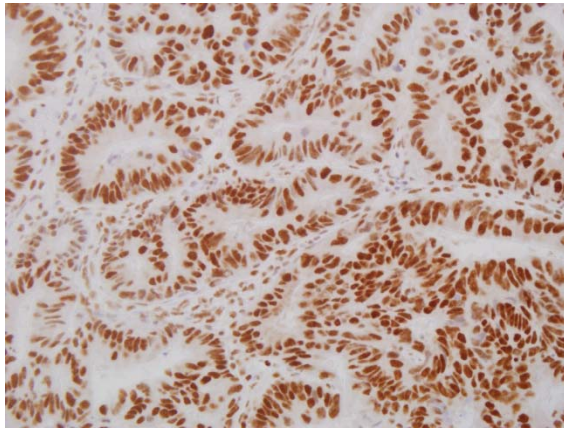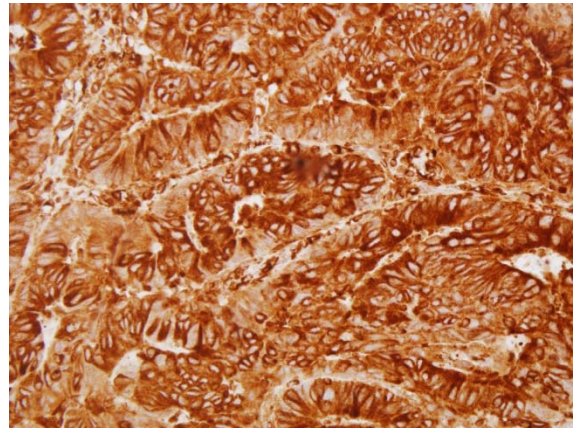

CRC CD1  
STAG2 (-)

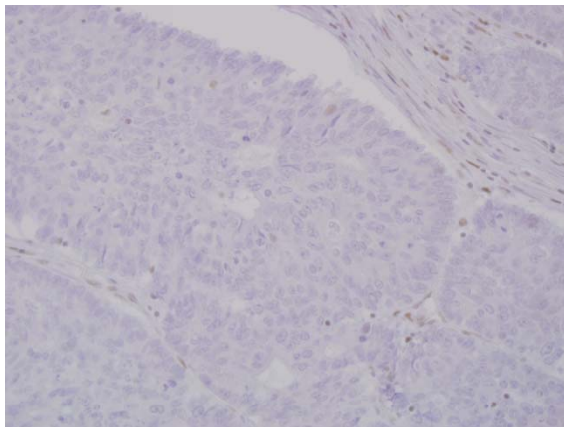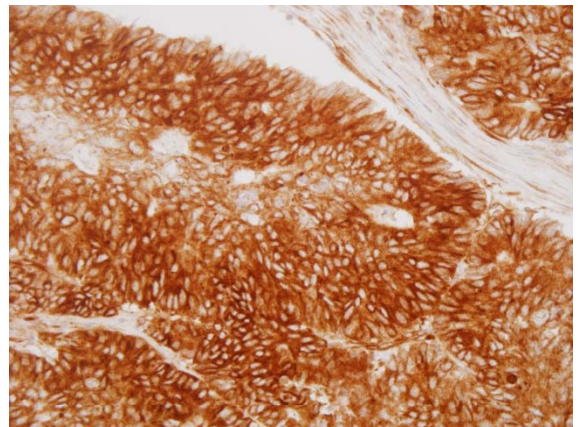

CRC DA7  
STAG2 (-)

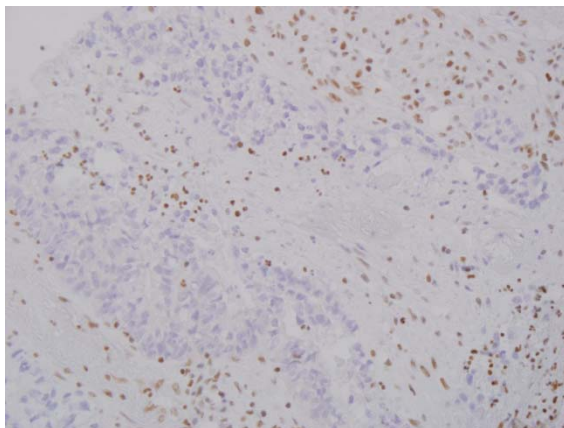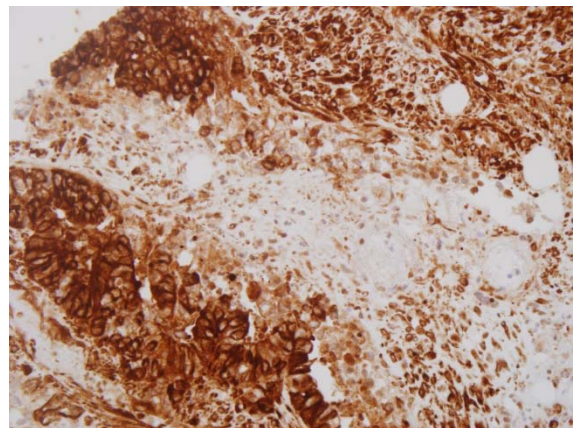



A

PCR screen of candidate 42MGBA STAG2 knock-in clones

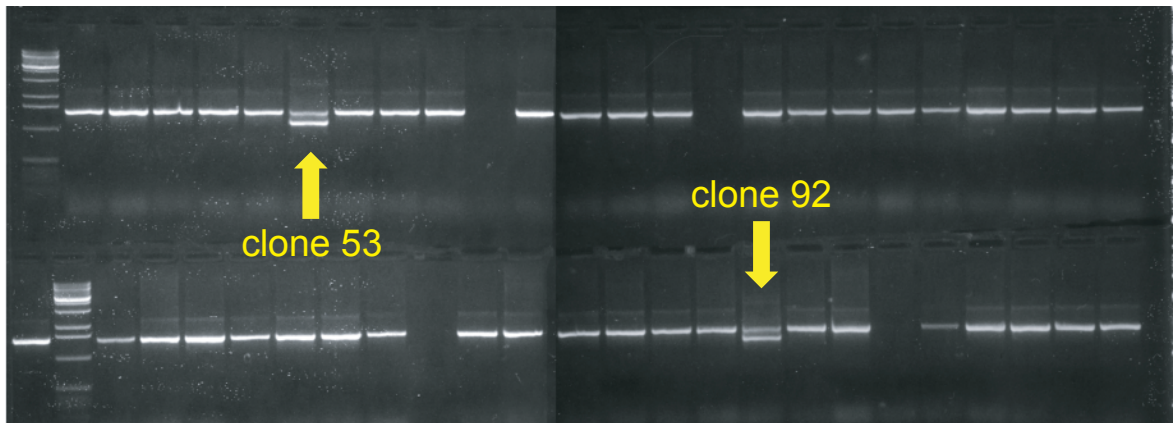

B

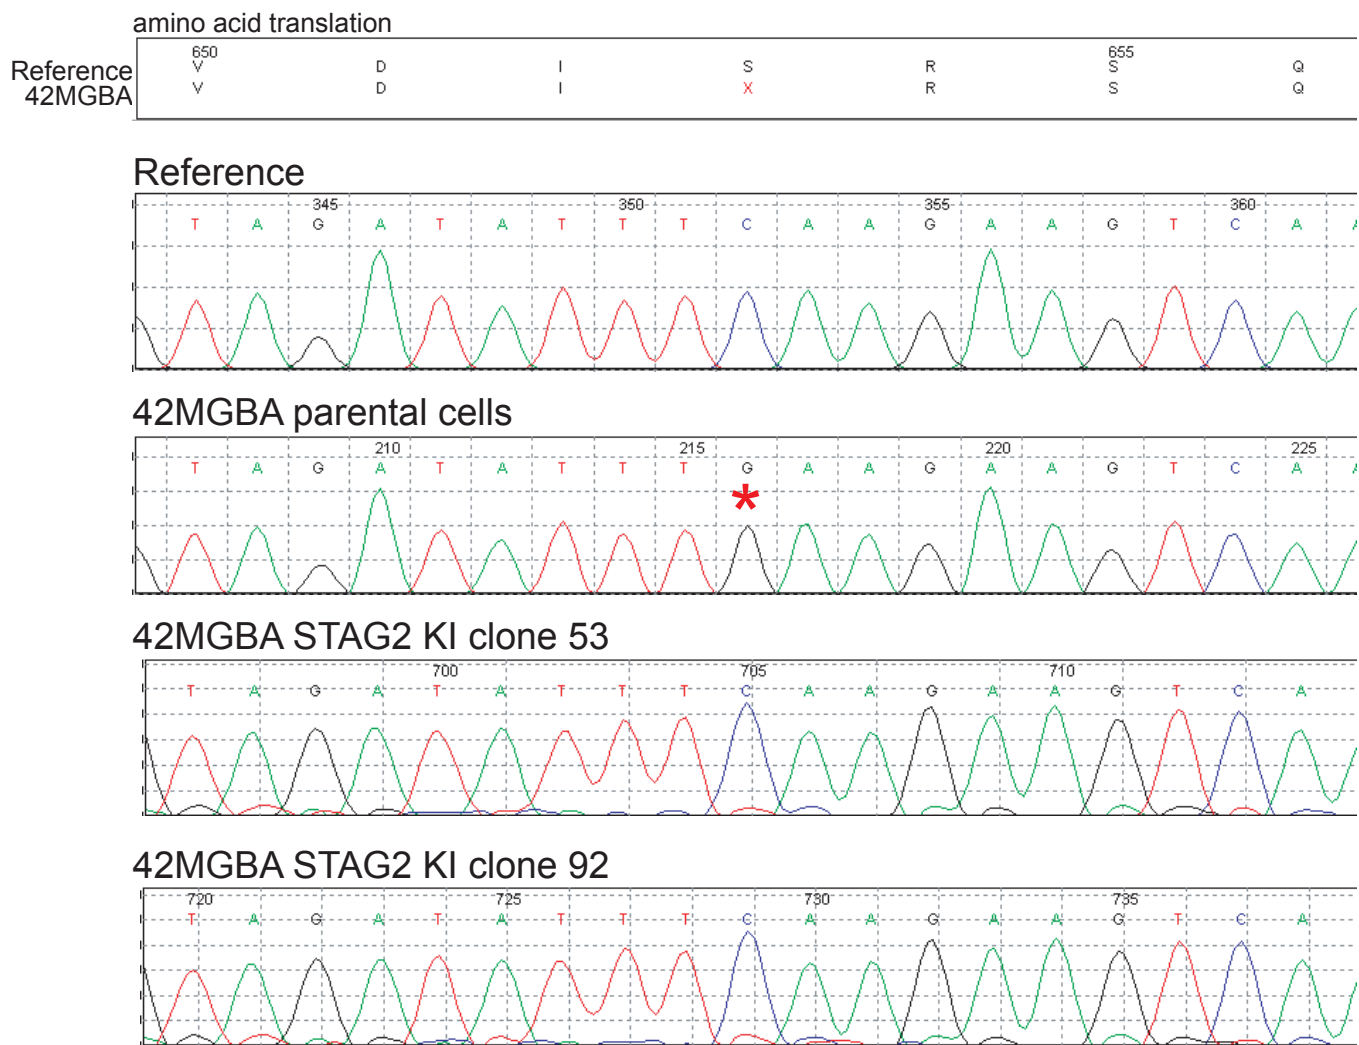

# Supplementary Figure 25

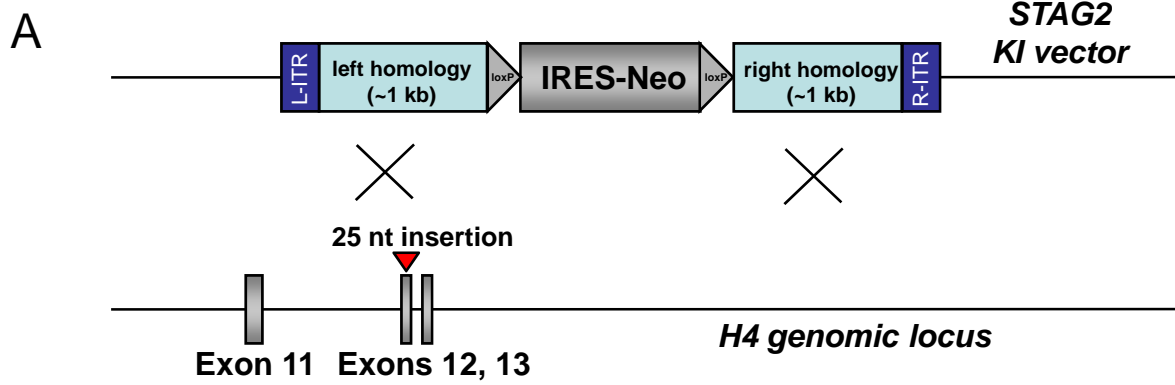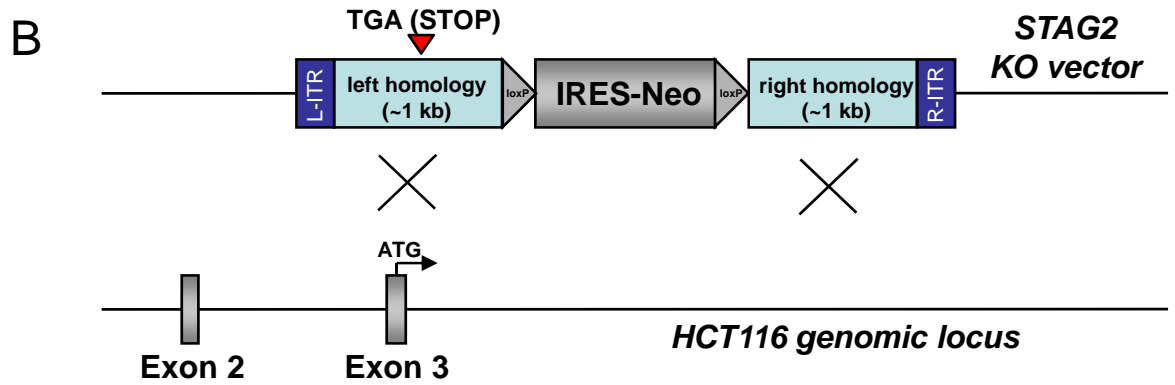

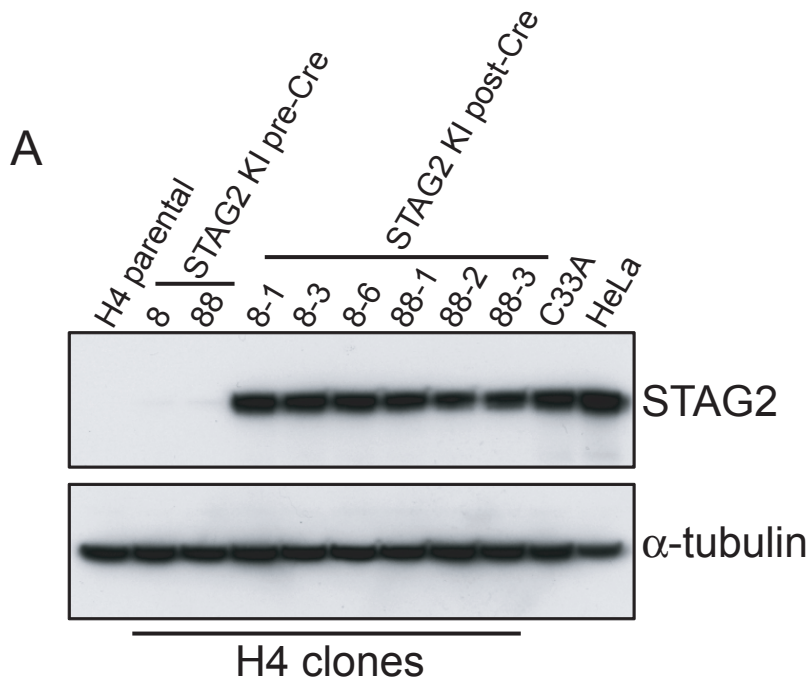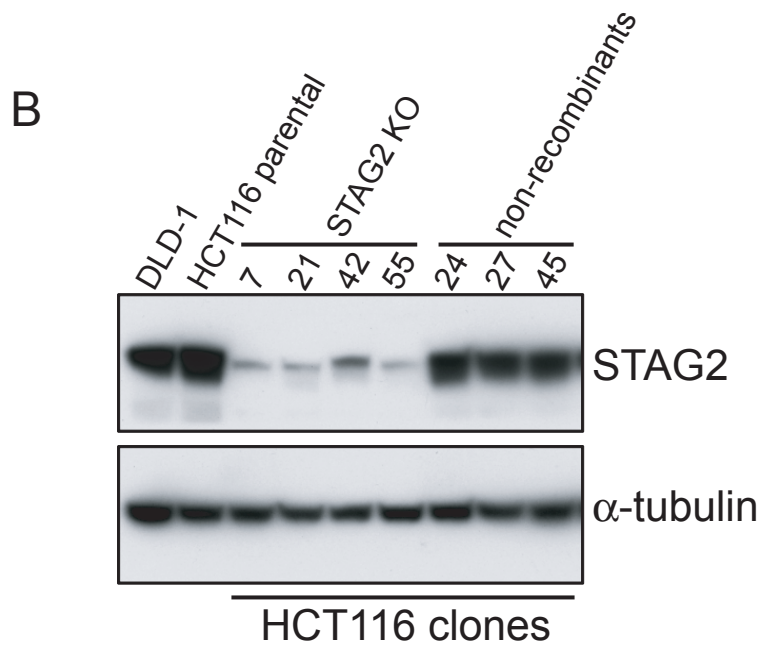

# Supplementary Figure 27

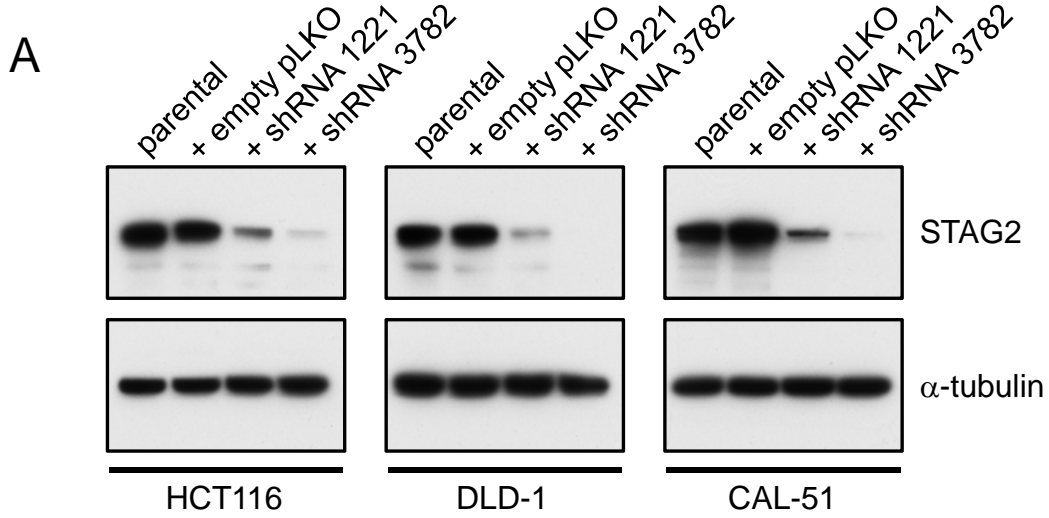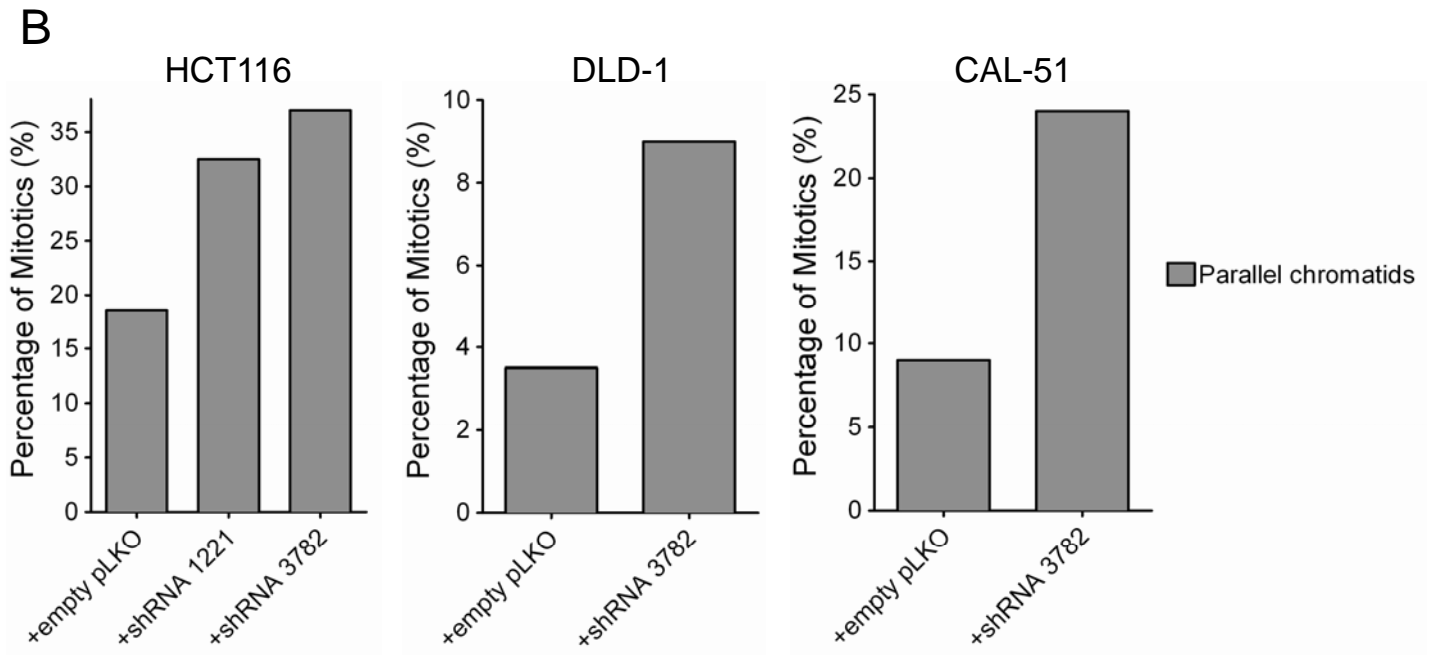

Supplementary Figure 28

A

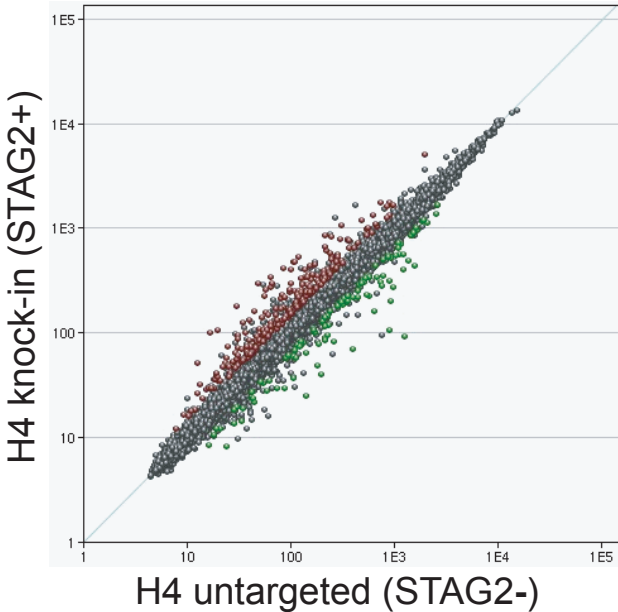

B

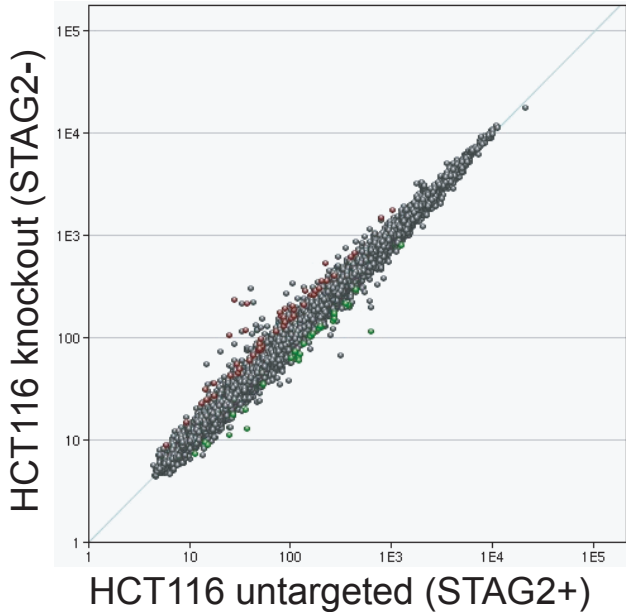



# Supplementary Table 3

Group 1: H4 parental cells and non-recombinant clones 10 and 12

Group 2: H4 STAG2 knock-in clones 8-1, 8-3, and 88-1

Statistics: t-test

Correction: Benjamini and Hochberg

Data Transformation: Log Transformed

| Grp1 Mean     | Grp1 SEM      | Grp2 Mean     | Grp2 SEM      | Ratio       | Direction | p-value      | Gene ID      | Gene Name                                                                |
|---------------|---------------|---------------|---------------|-------------|-----------|--------------|--------------|--------------------------------------------------------------------------|
| 10.2712       | 0.3675        | 6.5456        | 0.3165        | 13.23       | Down      | 0.002        | MMP3         | Matrix metalloproteinase 3 (stromelysin 1, progelatinase)                |
| 9.7974        | 0.2751        | 6.7493        | 0.1257        | 8.27        | Down      | 0.001        | ST8SIA4      | ST8 alpha-N-acetyl-neuraminide alpha-2,8-sialyltransferase 4             |
| 5.5683        | 0.1801        | 8.2272        | 0.1509        | 6.32        | Up        | 0.000        | FRMD4B       | FERM domain containing 4B                                                |
| 4.8819        | 0.4679        | 7.4870        | 0.2946        | 6.08        | Up        | 0.009        | FAP          | Fibroblast activation protein, alpha                                     |
| 4.0628        | 0.1991        | 6.6555        | 0.6868        | 6.03        | Up        | 0.022        | TAC1         | Tachykinin, precursor 1                                                  |
| 4.2749        | 0.1639        | 6.7521        | 0.3655        | 5.57        | Up        | 0.003        | DCN          | Decorin                                                                  |
| 8.6153        | 0.8492        | 6.1471        | 0.1015        | 5.53        | Down      | 0.045        | OR51B4       | Olfactory receptor, family 51, subfamily B, member 4                     |
| 7.1050        | 0.3730        | 4.6572        | 0.2281        | 5.46        | Down      | 0.005        | RGS18        | Regulator of G-protein signaling 18                                      |
| 5.9822        | 0.5267        | 8.4280        | 0.0463        | 5.45        | Up        | 0.010        | DAPK1        | Death-associated protein kinase 1                                        |
| 7.6110        | 0.2287        | 5.3149        | 0.1626        | 4.91        | Down      | 0.001        | CYB5A        | Cytochrome b5 type A (microsomal)                                        |
| 6.4001        | 0.5292        | 8.6927        | 0.4043        | 4.90        | Up        | 0.026        | AMTN         | Amelotin                                                                 |
| 6.0177        | 0.5928        | 8.2370        | 0.1396        | 4.66        | Up        | 0.022        | GABRQ        | Gamma-aminobutyric acid (GABA) receptor, theta                           |
| 6.8620        | 0.4401        | 9.0668        | 0.1181        | 4.61        | Up        | 0.008        | LEPREL1      | Leprecan-like 1                                                          |
| <b>6.7176</b> | <b>0.1232</b> | <b>8.9105</b> | <b>0.0206</b> | <b>4.57</b> | <b>Up</b> | <b>0.000</b> | <b>STAG2</b> | <b>Stromal antigen 2</b>                                                 |
| 5.8429        | 0.4912        | 8.0132        | 0.1146        | 4.50        | Up        | 0.013        | ANK3         | Ankyrin 3, node of Ranvier (ankyrin G)                                   |
| 9.8246        | 0.4899        | 7.6652        | 0.2323        | 4.47        | Down      | 0.016        | ADAMTS19     | ADAM metalloproteinase with thrombospondin type 1 motif, 19              |
| 6.7761        | 0.4615        | 8.9092        | 0.1903        | 4.39        | Up        | 0.013        | MGP          | Matrix Gla protein                                                       |
| 5.9754        | 0.3864        | 8.0889        | 0.4034        | 4.33        | Up        | 0.019        | SRGN         | Serglycin                                                                |
| 3.6503        | 0.0985        | 5.6848        | 0.3286        | 4.10        | Up        | 0.004        | -            |                                                                          |
| 5.7741        | 0.3952        | 7.8069        | 0.3620        | 4.09        | Up        | 0.019        | MME          | Membrane metallo-endopeptidase                                           |
| 6.6259        | 0.2985        | 8.6509        | 0.1496        | 4.07        | Up        | 0.004        | LPAR1        | Lysophosphatidic acid receptor 1                                         |
| 7.7160        | 0.2965        | 9.7379        | 0.1819        | 4.06        | Up        | 0.004        | DNER         | Delta/notch-like EGF repeat containing                                   |
| 9.3063        | 0.3424        | 7.3361        | 0.4572        | 3.92        | Down      | 0.026        | PTGS2        | Prostaglandin-endoperoxide synthase 2 (prostaglandin G/H synthase)       |
| 5.1012        | 0.4226        | 6.9820        | 0.0511        | 3.68        | Up        | 0.012        | PREX2        | Phosphatidylinositol-3,4,5-trisphosphate-dependent Rac exchange factor 2 |
| 5.4503        | 0.5498        | 7.3222        | 0.1496        | 3.66        | Up        | 0.030        | EPB41L3      | Erythrocyte membrane protein band 4.1-like 3                             |
| 7.4863        | 0.3523        | 5.6156        | 0.1405        | 3.66        | Down      | 0.008        | CDH7         | Cadherin 7, type 2                                                       |
| 8.2359        | 0.3763        | 10.0819       | 0.0660        | 3.60        | Up        | 0.008        | CD24         | CD24 molecule                                                            |
| 10.5931       | 0.3318        | 8.7751        | 0.1800        | 3.53        | Down      | 0.009        | TXNIP        | Thioredoxin interacting protein                                          |
| 9.9060        | 0.3948        | 8.1060        | 0.0619        | 3.48        | Down      | 0.011        | SEMA3D       | Semaphorin 3D                                                            |
| 7.9164        | 0.3761        | 9.7034        | 0.2032        | 3.45        | Up        | 0.014        | ALDH1A3      | Aldehyde dehydrogenase 1 family, member A3                               |
| 5.3140        | 0.3832        | 7.0540        | 0.4864        | 3.34        | Up        | 0.048        | -            | Gamma-aminobutyric acid (GABA) A receptor, epsilon                       |
| 8.0258        | 0.1959        | 6.3615        | 0.2293        | 3.17        | Down      | 0.005        | AOAH         | Acyloxyacyl hydrolase (neutrophil)                                       |
| 7.7192        | 0.0992        | 9.3762        | 0.0779        | 3.15        | Up        | 0.000        | TNFRSF21     | Tumor necrosis factor receptor superfamily, member 21                    |
| 4.9307        | 0.3210        | 6.5731        | 0.2368        | 3.12        | Up        | 0.015        | SCN3A        | Sodium channel, voltage-gated, type III, alpha subunit                   |
| 4.6102        | 0.3729        | 6.2208        | 0.2955        | 3.05        | Up        | 0.028        | C7orf69      | Chromosome 7 open reading frame 69                                       |
| 7.0668        | 0.5354        | 8.6585        | 0.1891        | 3.01        | Up        | 0.049        | TOX          | Thymocyte selection-associated high mobility group box                   |

## Ontologies

proteolysis

protein amino acid glycosylation

biopolymer catabolic process

positive regulation of acute inflammatory response, natriuresis

organ morphogenesis, peptide cross-linking via chondroitin 4-sulfate glycosaminoglycan

G-protein coupled receptor protein signaling pathway

regulation of G-protein coupled receptor protein signaling pathway

protein kinase, anti-apoptosis

electron transport chain

cell adhesion, biomineral formation

ion transport

oxidation reduction

**cell cycle, chromosome segregation**

signal transduction, establishment of protein localization

proteolysis

cartilage condensation

negative regulation of bone mineralization

proteolysis

G-protein coupled receptor protein signaling pathway

neuron migration

fatty acid biosynthetic process

G-protein coupled receptor protein signaling pathway

cortical actin cytoskeleton organization

homophilic cell adhesion

response to hypoxia

response to oxidative stress

nervous system development

kidney development, optic cup morphogenesis

ion transport, GABA signaling pathway

lipid metabolic process, inflammatory response

apoptosis, signal transduction

sodium ion transport

DNA binding

# Supplementary Table 4

**Group 1: 42MGBA parental cells and pre-Cre clones 53 and 92**

**Group 2: 42MGBA STAG2 knock-in clones 53-1, 53-7, and 92-6**

**Statistics: t-test**

**Correction: Benjamini and Hochberg**

**Data Transformation: Log Transformed**

| Grp1 Mean | Grp1 SEM | Grp2 Mean | Grp2 SEM | Ratio | Direction | p-value | Gene ID | Gene Name                                                          |
|-----------|----------|-----------|----------|-------|-----------|---------|---------|--------------------------------------------------------------------|
| 6.1588    | 0.3866   | 7.6770    | 0.2608   | 2.86  | Up        | 0.031   | ITGA6   | Integrin, alpha 6                                                  |
| 4.2746    | 0.3004   | 5.3110    | 0.1912   | 2.05  | Up        | 0.044   | KITLG   | KIT ligand                                                         |
| 4.5495    | 0.1372   | 5.4141    | 0.2706   | 1.82  | Up        | 0.046   | PLCB4   | Phospholipase C, beta 4                                            |
| 7.7872    | 0.2043   | 6.9765    | 0.0411   | 1.75  | Down      | 0.018   | BDKRB1  | Bradykinin receptor B1                                             |
| 4.4900    | 0.2242   | 5.2741    | 0.0829   | 1.72  | Up        | 0.030   | CARD16  | Caspase recruitment domain family, member 16                       |
| 6.2648    | 0.2173   | 7.0278    | 0.1582   | 1.70  | Up        | 0.047   | EPS8    | Epidermal growth factor receptor pathway substrate 8               |
| 6.2226    | 0.1259   | 5.4879    | 0.0834   | 1.66  | Down      | 0.008   | -       | ncrna: ENSG00000210467                                             |
| 6.6446    | 0.0747   | 5.9433    | 0.2342   | 1.63  | Down      | 0.046   | TSHZ1   | Teashirt zinc finger homeobox 1                                    |
| 4.7247    | 0.2282   | 4.0496    | 0.0467   | 1.60  | Down      | 0.044   | NT5E    | 5-nucleotidase, ecto (CD73)                                        |
| 4.8573    | 0.0934   | 5.5255    | 0.2091   | 1.59  | Up        | 0.043   | -       | chromosome 6 open reading frame 155                                |
| 5.6906    | 0.1293   | 6.3526    | 0.0752   | 1.58  | Up        | 0.011   | UQCRFS1 | Ubiquinol-cytochrome c reductase, Rieske iron-sulfur polypeptide 1 |
| 4.5136    | 0.0734   | 5.1756    | 0.0836   | 1.58  | Up        | 0.004   | -       |                                                                    |
| 5.7196    | 0.0943   | 6.3651    | 0.1795   | 1.56  | Up        | 0.033   | ELMO1   | Engulfment and cell motility 1                                     |
| 7.2171    | 0.0293   | 7.8291    | 0.0759   | 1.53  | Up        | 0.002   | ALDH1L2 | Aldehyde dehydrogenase 1 family, member L2                         |
| 5.9287    | 0.1098   | 5.3120    | 0.0929   | 1.53  | Down      | 0.013   | -       | ncrna: ENSG00000199568                                             |
| 7.6471    | 0.0472   | 7.0578    | 0.1564   | 1.50  | Down      | 0.023   | FBLN5   | Fibulin 5                                                          |

## **Ontologies**

cell-matrix adhesion, signal transduction

hematopoiesis, cell survival and proliferation

lipid catabolic process, signal transduction

G-protein coupled receptor, regulation of inflammation and vascular tone

proteolysis, regulation of apoptosis

signal transduction, cell proliferation

regulation of transcription, developmental pattern formation

purine nucleotide biosynthetic process

cellular metabolism, electron transport chain

cell motility, phagocytosis, apoptosis

metabolic process

cell-matrix adhesion

# Supplementary Table 5

Group 1: HCT116 STAG2 non-recombinant clones 24 and 27

Group 2: HCT116 STAG2 knockout clones 7 and 21

Statistics: t-test

Correction: Benjamini and Hochberg

Data Transformation: Log Transformed

| Grp1 Mean     | Grp1 SEM      | Grp2 Mean     | Grp2 SEM      | Ratio       | Direction   | p-value      | Gene ID      | Gene Name                                                   |
|---------------|---------------|---------------|---------------|-------------|-------------|--------------|--------------|-------------------------------------------------------------|
| 4.8069        | 0.1443        | 7.8713        | 0.0645        | 8.37        | Up          | 0.003        | ANGPT2       | Angiopoietin 2                                              |
| 5.2230        | 0.1343        | 7.7417        | 0.0497        | 5.73        | Up          | 0.003        | ITGB8        | Integrin, beta 8                                            |
| <b>9.2903</b> | <b>0.0076</b> | <b>6.8549</b> | <b>0.2890</b> | <b>5.41</b> | <b>Down</b> | <b>0.014</b> | <b>STAG2</b> | <b>Stromal antigen 2</b>                                    |
| 4.6207        | 0.0605        | 6.7285        | 0.1329        | 4.31        | Up          | 0.005        | TM4SF18      | Transmembrane 4 L six family member 18                      |
| 5.1775        | 0.1844        | 6.8892        | 0.1114        | 3.28        | Up          | 0.015        | SCML1        | Sex comb on midleg-like 1                                   |
| 5.2243        | 0.1772        | 3.7052        | 0.1321        | 2.87        | Down        | 0.021        | -            | ncrna: ENSG00000200662                                      |
| 7.7983        | 0.0275        | 9.0658        | 0.1807        | 2.41        | Up          | 0.020        | EGR1         | Early growth response 1                                     |
| 6.3049        | 0.0087        | 7.4512        | 0.0886        | 2.21        | Up          | 0.006        | SLCO3A1      | Solute carrier organic anion transporter family, member 3A1 |
| 4.6207        | 0.1529        | 3.4761        | 0.0503        | 2.21        | Down        | 0.019        | -            | ncrna: ENSG00000207356                                      |
| 3.8346        | 0.1619        | 4.9552        | 0.1310        | 2.17        | Up          | 0.033        | SLC40A1      | Solute carrier family 40, member 1                          |
| 6.4773        | 0.1765        | 7.5855        | 0.1829        | 2.16        | Up          | 0.049        | C4orf34      | Chromosome 4 open reading frame 34                          |
| 7.1029        | 0.0904        | 8.1371        | 0.0864        | 2.05        | Up          | 0.014        | TP53INP1     | Tumor protein p53 inducible nuclear protein 1               |
| 4.1376        | 0.0279        | 5.1599        | 0.1105        | 2.03        | Up          | 0.012        | RASGRP1      | RAS guanyl releasing protein 1                              |
| 6.9081        | 0.2230        | 5.8948        | 0.0487        | 2.02        | Down        | 0.047        | -            | zinc finger protein 487                                     |
| 6.3336        | 0.0267        | 7.3363        | 0.1681        | 2.00        | Up          | 0.028        | DAPK1        | Death-associated protein kinase 1                           |

### Ontologies

signal transduction, negative regulator of angiogenesis

ganglioside metabolic process, cell-matrix adhesion

**cell cycle, chromosome segregation**

membrane function

anatomical structure morphogenesis, transcriptional regulation

negative regulation of transcription from RNA polymerase II promoter

ion transport

iron transport and homeostasis

protein binding, membrane component

induction of apoptosis, cell cycle arrest

Ras protein signal transduction, cell differentiation

protein kinase, anti-apoptosis

# Supplementary Figure 29

A

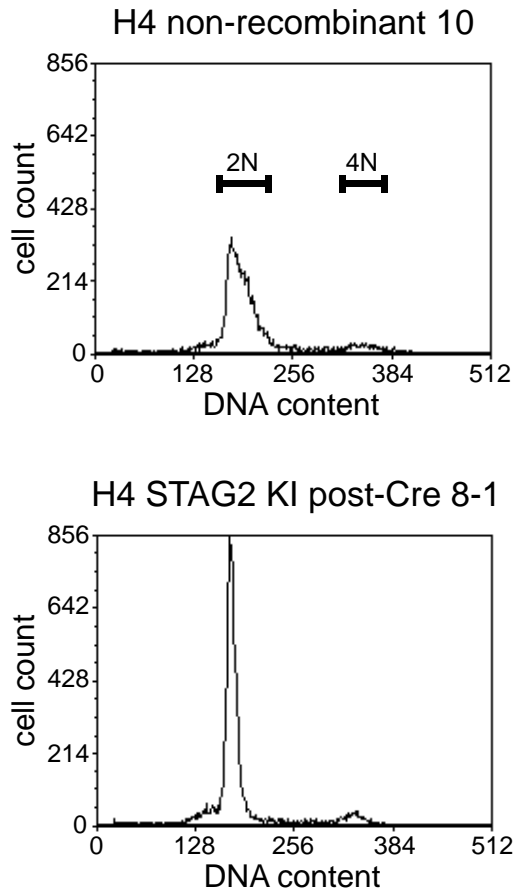

B

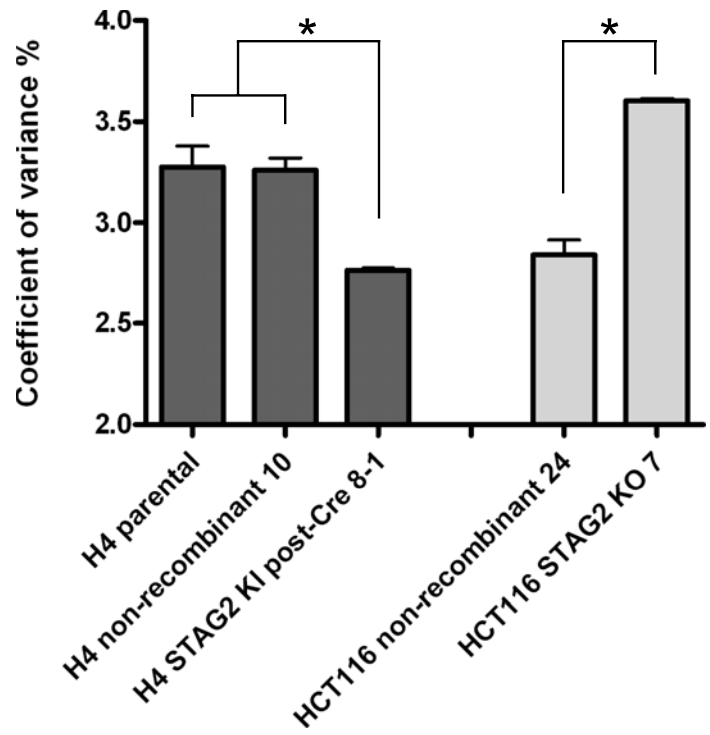

# Supplementary Figure 30A

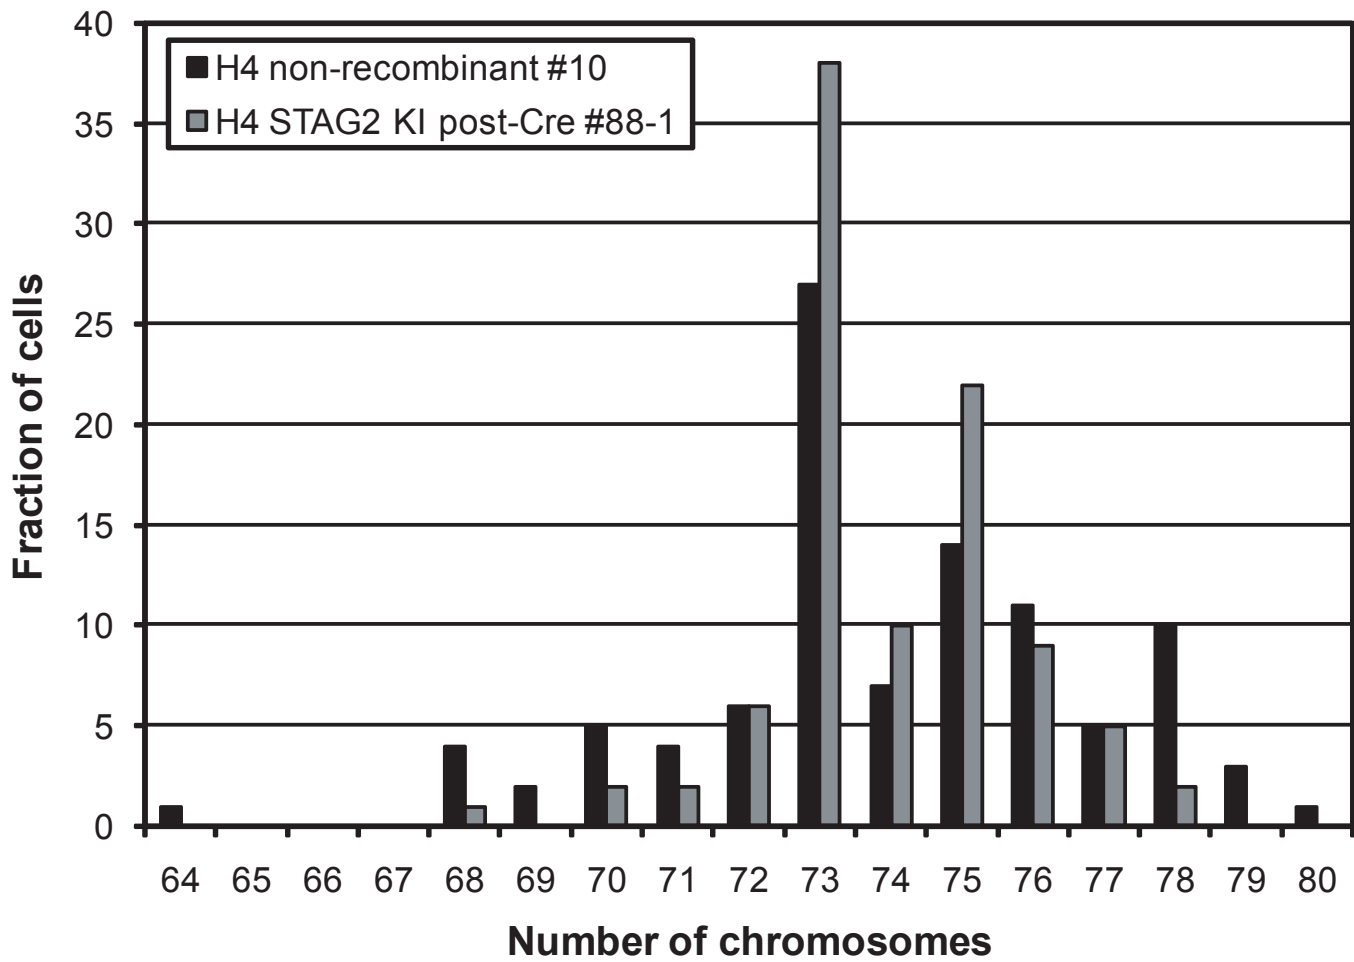

| Cell line                 | # of cells counted | Range of chromosomes per cell | Mean # | Average variation from mean # | <i>p</i> value |
|---------------------------|--------------------|-------------------------------|--------|-------------------------------|----------------|
| H4 non-recombinant 10     | 100                | 64-80                         | 74.0   | 2.3                           | <0.0001        |
| H4 STAG2 KI post-Cre 88-1 | 100                | 68-78                         | 73.9   | 1.4                           |                |



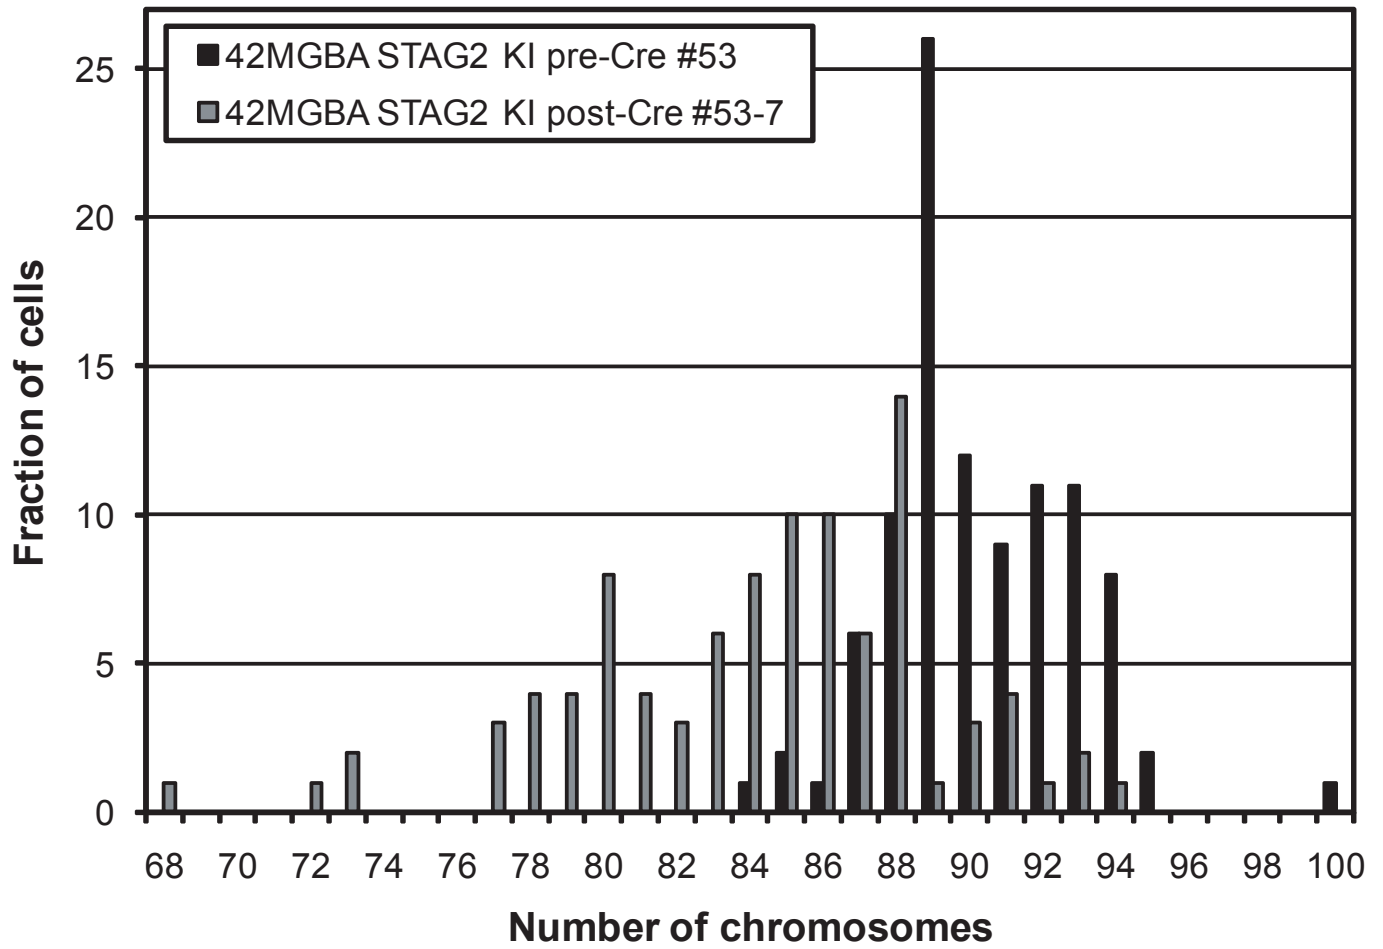

| Cell line                     | # of cells counted | Range of chromosomes per cell | Mean # | <i>p</i> value |
|-------------------------------|--------------------|-------------------------------|--------|----------------|
| 42MGBA STAG2 KI pre-Cre 53    | 100                | 84-100                        | 90.3   | <0.0001        |
| 42MGBA STAG2 KI post-Cre 53-7 | 100                | 68-94                         | 84.2   |                |

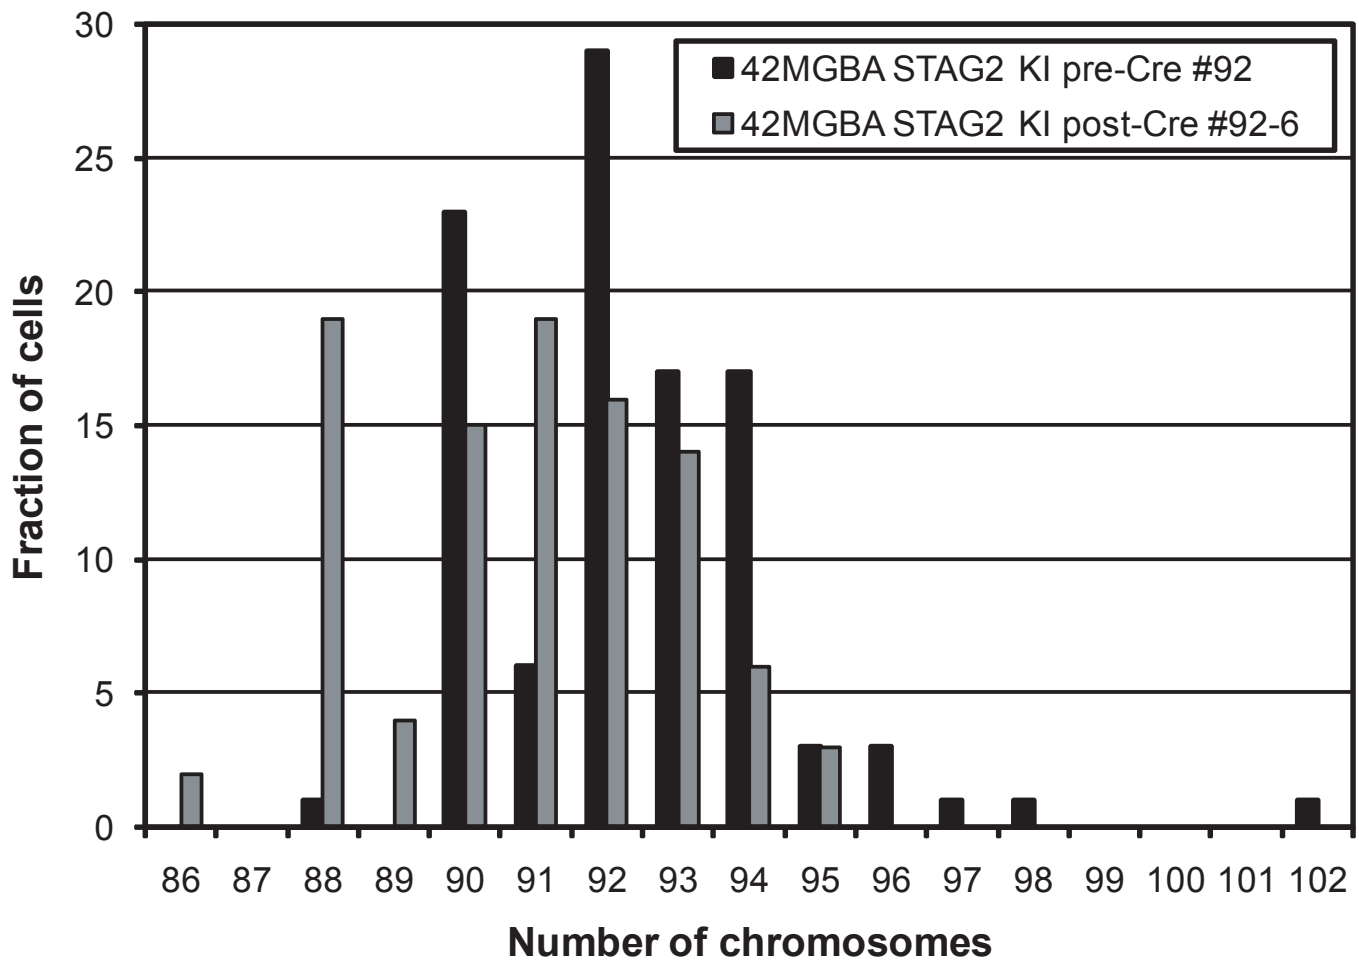

| Cell line                     | # of cells counted | Range of chromosomes per cell | Mean # | <i>p</i> value |
|-------------------------------|--------------------|-------------------------------|--------|----------------|
| 42MGBA STAG2 KI pre-Cre 92    | 100                | 88-102                        | 92.4   | <0.0001        |
| 42MGBA STAG2 KI post-Cre 92-6 | 100                | 86-95                         | 90.8   |                |

# Supplementary Figure 30D

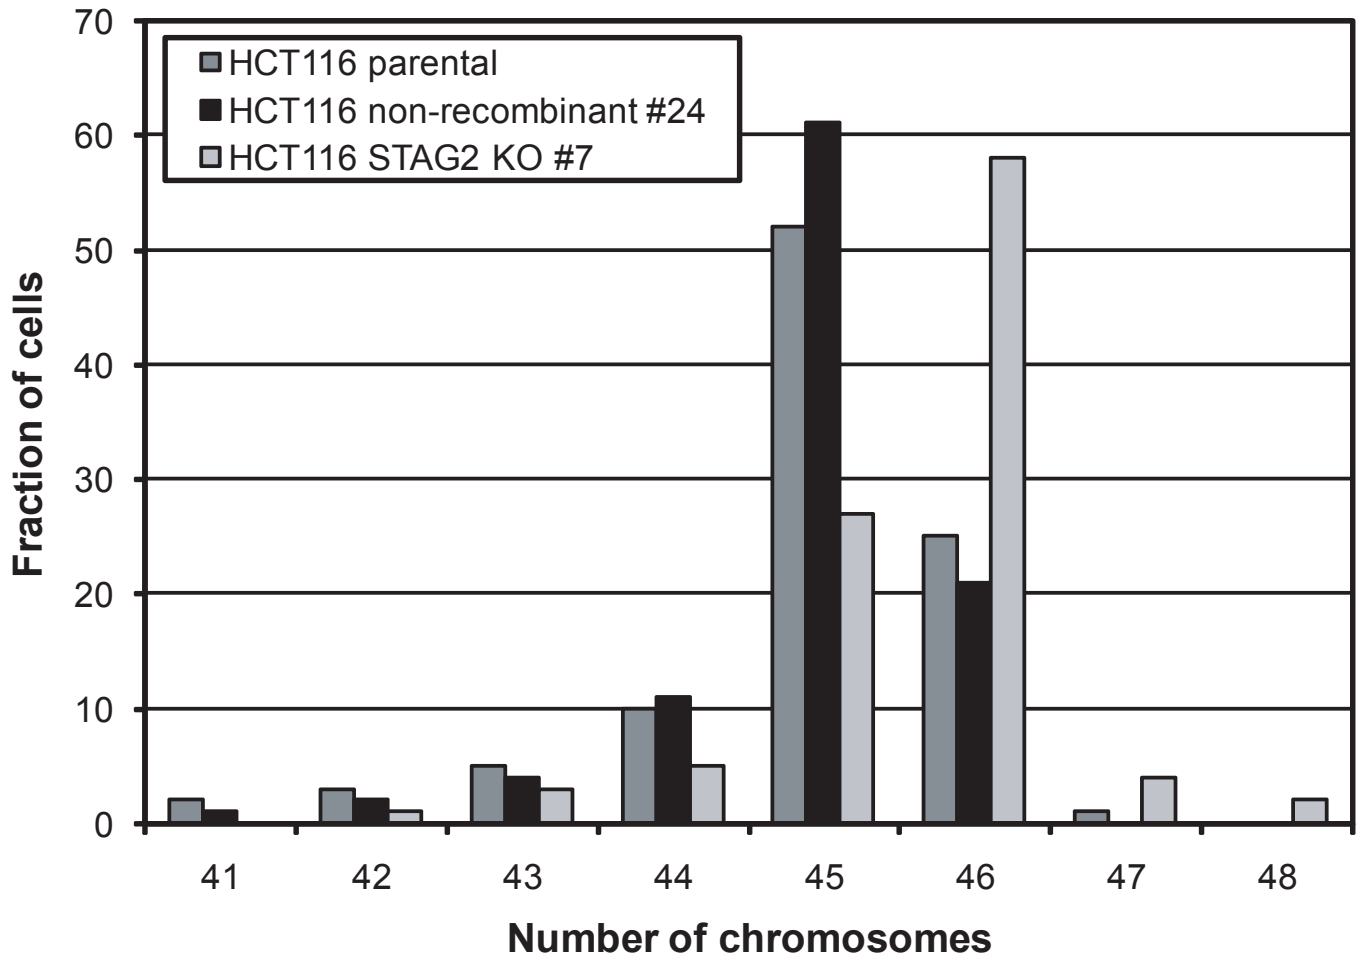

| Cell line                 | # of cells counted | Range of chromosomes per cell | Modal # | Mean # | <i>p</i> value |
|---------------------------|--------------------|-------------------------------|---------|--------|----------------|
| HCT116 parental           | 100                | 41-47                         | 45      | 44.9   | -              |
| HCT116 non-recombinant 24 | 200                | 41-46                         | 45      | 45.1   | <0.0001        |
| HCT116 STAG2 KO 7         | 200                | 42-48                         | 46      | 45.8   |                |

Supplementary Figure 30E

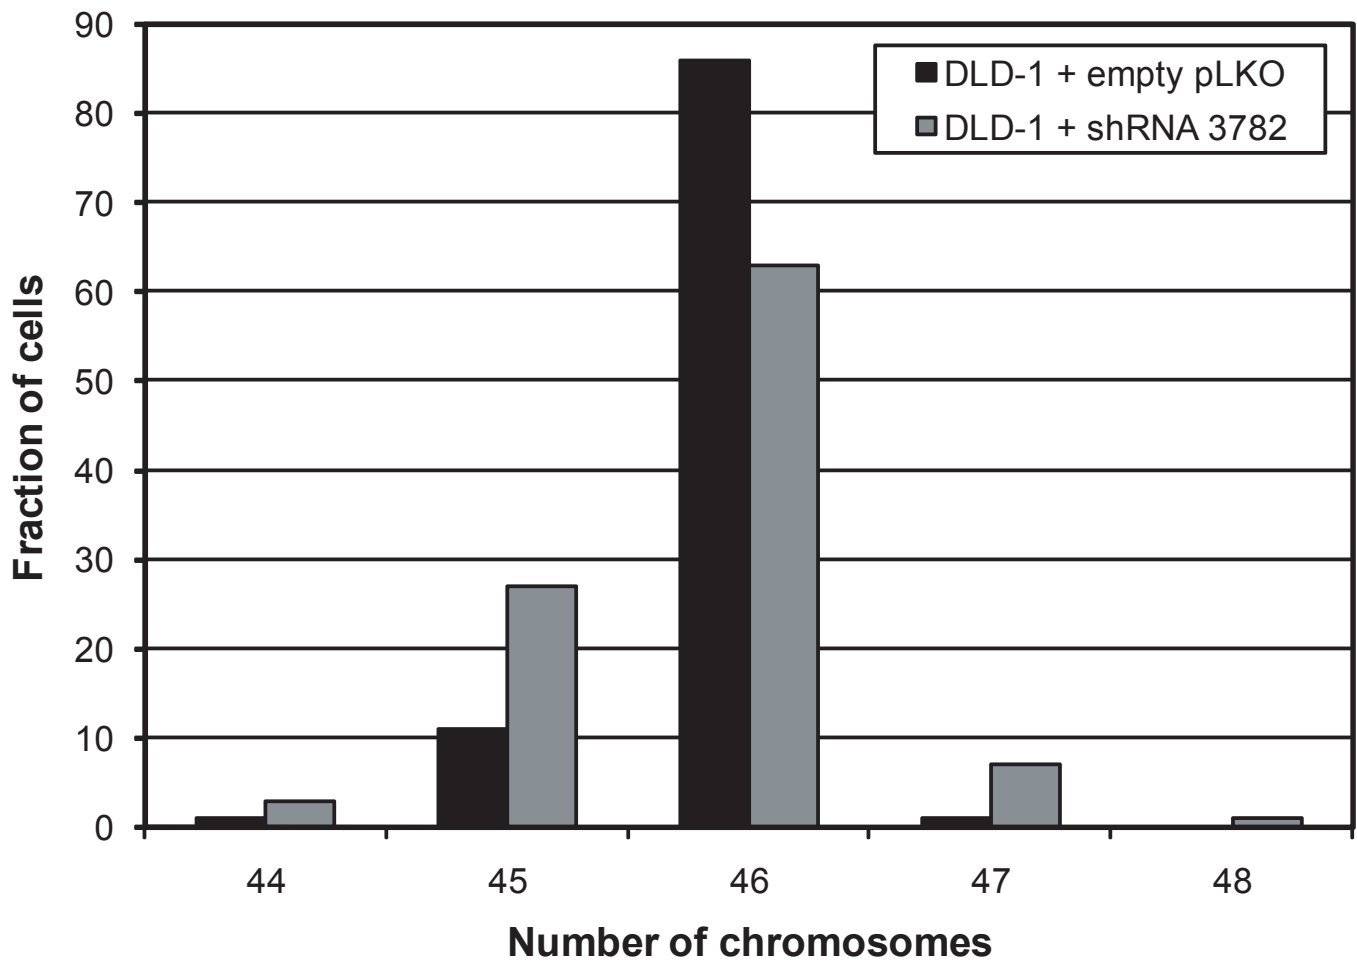

| Cell line          | # of cells counted | Range of chromosomes per cell | Mean # | Average variation from mean # | <i>p</i> value |
|--------------------|--------------------|-------------------------------|--------|-------------------------------|----------------|
| DLD-1 + empty pLKO | 100                | 44-47                         | 45.9   | 0.23                          | <0.0001        |
| DLD-1 + shRNA 3782 | 100                | 44-48                         | 45.8   | 0.51                          |                |

Supplementary Figure 31A

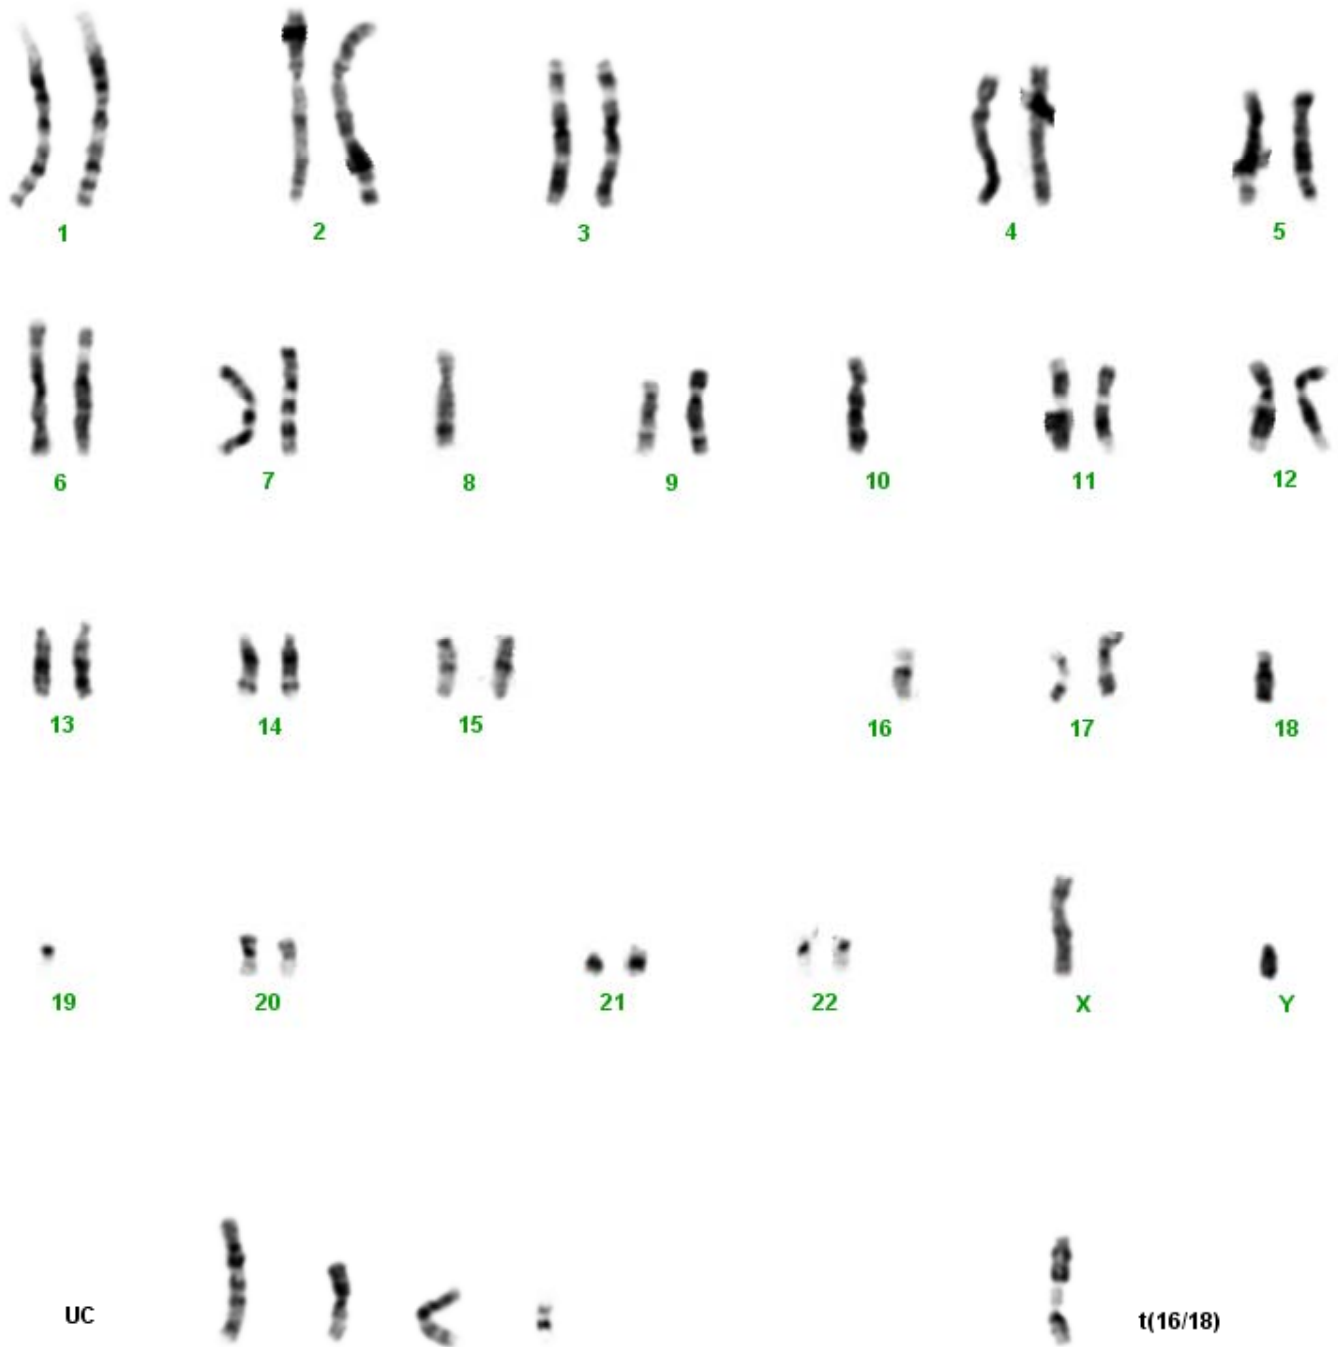

Supplementary Figure 31B

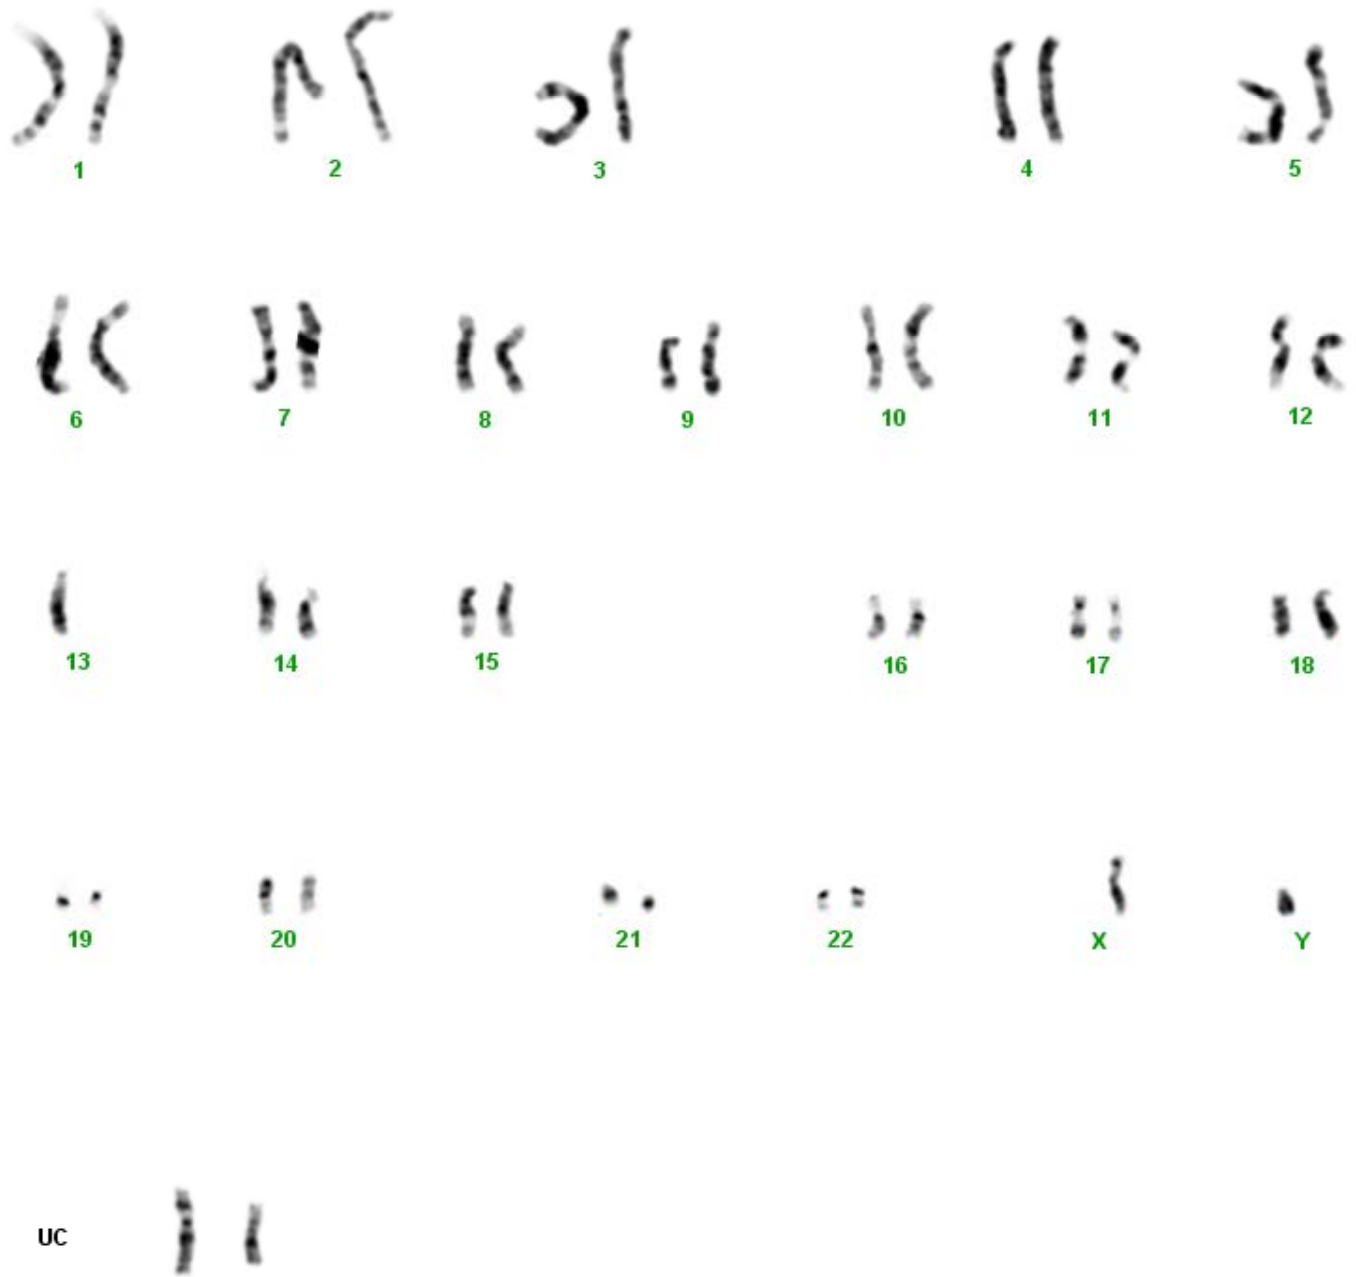



Supplementary Figure 31C

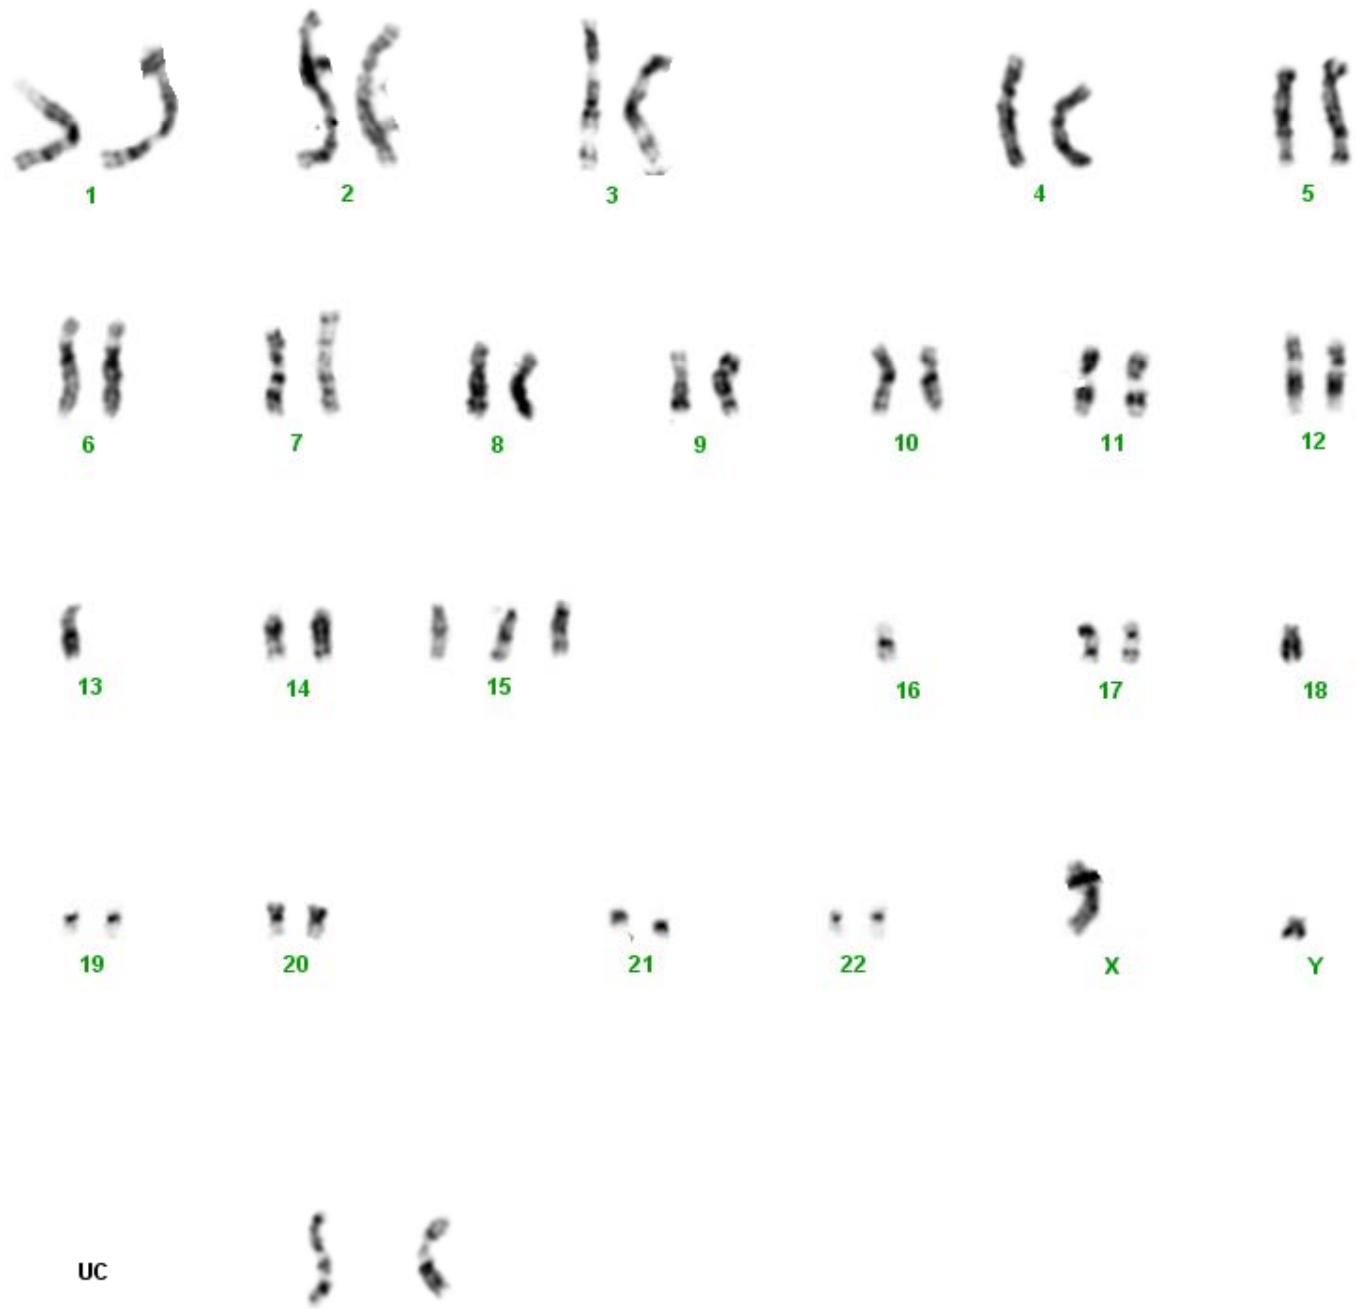

## Supplementary Table 6

### Primers for sequencing coding exons of STAG2 gene<sup>\*,#</sup>

| Exon # | Forward primer                 | Reverse primer                   |
|--------|--------------------------------|----------------------------------|
| 3      | M13F-GCACTGGGGAATTTAACTTTTG    | CAGAGCCTTGATGAGTGCTG             |
| 4      | M13F-TCTTGTGTGTTTGGTAACGTGC    | GCTTACCATACCAATCAGCTCC           |
| 5      | M13F-GGACACCACAAAGAGGCTGT      | TGCAATTAGAAAAATCAGAGCTACA        |
| 6      | TTGACTTCCATAGTTTCCACATTC       | M13F-AAAGTGCTAACAACATCTCTTTAGGTG |
| 7      | AGTAAAGTGAGTCAGGTAGAAATGGC     | M13F-CATGCCCAGCCTAATGCTTAC       |
| 8      | M13F-GGATTTATTGGAGAAGAAAGGTGAG | AATTCGCAGGAGGGATGG               |
| 9      | M13F-CATTTGTAGCAGCTGCATCTTTT   | TGTTGGGCAAATAGTTTGAAATG          |
| 10     | CCAATCAAATATTTTCAAGGTATTAAGGG  | M13F-TGACTCAGTGGCACTAATGGAG      |
| 11     | GTGAGCAAAGGCTGGGATATG          | M13F-GGAGGCTTCCAGAAATGTGTC       |
| 12     | TCTGAAGGAATGCTATGGTATGAAA      | M13F-TGTCAAGGGTCATAGACACAATTC    |
| 13     | TTTACCAGTCGGTTCAAGGTTAG        | M13F-TTCTATGGTTCCTTCTTCCTGTG     |
| 14     | GGACGTTACTAAAAGCACCTGTT        | M13F-CCCAGCCTACATTTCCCTTT        |
| 15     | TGTGCCATGTTGGATGATATTG         | M13F-GGGTGGCTCTCCATTCTATTG       |
| 16     | GCAAGCAAATAAGGCAGTTTC          | M13F-ATAAAGAATGTTGACAGCAATTACATC |
| 17     | GGCAGATTCTGTTTACAGGCAG         | M13F-TCAAATTTCTCAAATTGCTAATGC    |
| 18     | ACCATCTGAAGGTAGAGTTGGTTAG      | M13F-AAAGCATTATAATATTCTGTGAGGCA  |
| 19     | M13F-TGGCCCTTCCAGTTATTAGC      | CAAAGGGAAGCATCATTACCG            |
| 20     | M13F-CCATGGTGGTATGGTCATGTAG    | CTGCTAGGGACTATCACCAAGAC          |
| 21     | M13F-CCCAGCCATATTGCCTTAAAT     | CCCACAACGACAACAACAAT             |
| 22     | CGTTGTGGGGGCATTTTA             | M13F-GCAAGTTGCCAAAGGATTACA       |
| 23     | M13F-AAATGGAGACATGCCTGAGC      | AACCACAGATTATGCCACCTTC           |
| 24     | TTAAGGCTGCAATTTGGTGAG          | M13F-CAAGATATTTCTGCTTTGCTCAAT    |
| 25     | GCCTTATACAAATATAAGCATTTCGTTG   | M13F-GCTGGAATATATACCTGTGTTTCACG  |
| 26     | TGGAGTGATTCAGTTCCATTTG         | M13F-CCTTAAAGAATTCAATGGCAGC      |
| 27     | M13F-GGTTTCAGTAACATTCTTTCCTGC  | ACTTTGCCCAATTTCAACTGC            |
| 28     | M13F-CAGTGCCTCATTATTGAACACC    | AATTGAGATAGCACTGTAAGTGGTTC       |
| 29     | GCTTGGCAAAGGAAGTAGTGAG         | M13F-AATGCAATCCTACAATTCTGTGTG    |
| 30     | M13F-ATGCCTATGCTCGCACAACATA    | TTTGTAAGCTATTATTGAACACATCTCA     |
| 31     | M13F-CAGGGACTGCCCTTACATA       | TTGCCTTGCTTCCTCTTGTT             |
| 32     | M13F-TCCAATGCAGACTGAACATCA     | TGCTTTTCTGTTGGAAAGACC            |
| 33     | M13F-AGAGAGCCACATACTGCTGCC     | GGATCTACCACCTTCACCAACC           |
| 34     | TGTGTCAGGTACACTTGAATCAC        | M13F-CCTCCCCTGAAATCCTGC          |
| 35     | TGAGGTAAGTAGCATCTTGATTAGTCC    | M13F-CCTCAATGCACTTGATCTTGG       |

\*The exon numbering is annotated according to ENSEMBL transcript ENST00000218089.

#M13F denotes the universal sequencing primer, 5'-GTAAAACGACGGCCAGT-3'

## References and Notes

1. D. Hanahan, R. A. Weinberg, Hallmarks of cancer: The next generation. *Cell* **144**, 646 (2011). [doi:10.1016/j.cell.2011.02.013](https://doi.org/10.1016/j.cell.2011.02.013) [Medline](#)
2. C. Lengauer, K. W. Kinzler, B. Vogelstein, Genetic instabilities in human cancers. *Nature* **396**, 643 (1998). [doi:10.1038/25292](https://doi.org/10.1038/25292) [Medline](#)
3. L. A. Loeb, Mutator phenotype may be required for multistage carcinogenesis. *Cancer Res.* **51**, 3075 (1991). [Medline](#)
4. D. P. Cahill *et al.*, Mutations of mitotic checkpoint genes in human cancers. *Nature* **392**, 300 (1998). [doi:10.1038/32688](https://doi.org/10.1038/32688) [Medline](#)
5. K. Nasmyth, Segregating sister genomes: The molecular biology of chromosome separation. *Science* **297**, 559 (2002). [doi:10.1126/science.1074757](https://doi.org/10.1126/science.1074757) [Medline](#)
6. D. A. Solomon *et al.*, Identification of p18<sup>INK4c</sup> as a tumor suppressor gene in glioblastoma multiforme. *Cancer Res.* **68**, 2564 (2008). [doi:10.1158/0008-5472.CAN-07-6388](https://doi.org/10.1158/0008-5472.CAN-07-6388) [Medline](#)
7. D. A. Solomon *et al.*, Mutational inactivation of PTPRD in glioblastoma multiforme and malignant melanoma. *Cancer Res.* **68**, 10300 (2008). [doi:10.1158/0008-5472.CAN-08-3272](https://doi.org/10.1158/0008-5472.CAN-08-3272) [Medline](#)
8. Materials and methods are available as supporting material on *Science Online*.
9. I. Sumara, E. Vorlaufer, C. Gieffers, B. H. Peters, J. M. Peters, Characterization of vertebrate cohesin complexes and their regulation in prophase. *J. Cell Biol.* **151**, 749 (2000). [doi:10.1083/jcb.151.4.749](https://doi.org/10.1083/jcb.151.4.749) [Medline](#)
10. C. H. Haering, A. M. Farcas, P. Arumugam, J. Metson, K. Nasmyth, The cohesin ring concatenates sister DNA molecules. *Nature* **454**, 297 (2008). [doi:10.1038/nature07098](https://doi.org/10.1038/nature07098) [Medline](#)
11. M. J. Walter *et al.*, Acquired copy number alterations in adult acute myeloid leukemia genomes. *Proc. Natl. Acad. Sci. U.S.A.* **106**, 12950 (2009). [doi:10.1073/pnas.0903091106](https://doi.org/10.1073/pnas.0903091106) [Medline](#)
12. K. L. Goringe *et al.*, Are there any more ovarian tumor suppressor genes? A new perspective using ultra high-resolution copy number and loss of heterozygosity analysis. *Genes Chromosomes Cancer* **48**, 931 (2009). [doi:10.1002/gcc.20694](https://doi.org/10.1002/gcc.20694) [Medline](#)
13. J. Rocquain *et al.*, Alteration of cohesin genes in myeloid diseases. *Am. J. Hematol.* **85**, 717 (2010). [doi:10.1002/ajh.21798](https://doi.org/10.1002/ajh.21798) [Medline](#)
14. J. S. Kim, C. Bonifant, F. Bunz, W. S. Lane, T. Waldman, Epitope tagging of endogenous genes in diverse human cell lines. *Nucleic Acids Res.* **36**, e127 (2008). [doi:10.1093/nar/gkn566](https://doi.org/10.1093/nar/gkn566) [Medline](#)
15. E. Lara-Pezzi *et al.*, Evidence of a transcriptional co-activator function of cohesin STAG/SA/Scc3. *J. Biol. Chem.* **279**, 6553 (2004). [doi:10.1074/jbc.M307663200](https://doi.org/10.1074/jbc.M307663200) [Medline](#)
16. K. S. Wendt *et al.*, Cohesin mediates transcriptional insulation by CCCTC-binding factor. *Nature* **451**, 796 (2008). [doi:10.1038/nature06634](https://doi.org/10.1038/nature06634) [Medline](#)

17. M. H. Kagey *et al.*, Mediator and cohesin connect gene expression and chromatin architecture. *Nature* **467**, 430 (2010). [doi:10.1038/nature09380](https://doi.org/10.1038/nature09380) [Medline](#)
18. N. Zhang *et al.*, Overexpression of Separase induces aneuploidy and mammary tumorigenesis. *Proc. Natl. Acad. Sci. U.S.A.* **105**, 13033 (2008). [doi:10.1073/pnas.0801610105](https://doi.org/10.1073/pnas.0801610105) [Medline](#)
19. D. J. Baker, F. Jin, K. B. Jeganathan, J. M. van Deursen, Whole chromosome instability caused by Bub1 insufficiency drives tumorigenesis through tumor suppressor gene loss of heterozygosity. *Cancer Cell* **16**, 475 (2009). [doi:10.1016/j.ccr.2009.10.023](https://doi.org/10.1016/j.ccr.2009.10.023) [Medline](#)
20. P. V. Jallepalli *et al.*, Securin is required for chromosomal stability in human cells. *Cell* **105**, 445 (2001). [doi:10.1016/S0092-8674\(01\)00340-3](https://doi.org/10.1016/S0092-8674(01)00340-3) [Medline](#)
21. R. Sotillo *et al.*, Mad2 overexpression promotes aneuploidy and tumorigenesis in mice. *Cancer Cell* **11**, 9 (2007). [doi:10.1016/j.ccr.2006.10.019](https://doi.org/10.1016/j.ccr.2006.10.019) [Medline](#)
22. H. Rajagopalan *et al.*, Inactivation of hCDC4 can cause chromosomal instability. *Nature* **428**, 77 (2004). [doi:10.1038/nature02313](https://doi.org/10.1038/nature02313) [Medline](#)
23. Z. Wang *et al.*, Three classes of genes mutated in colorectal cancers with chromosomal instability. *Cancer Res.* **64**, 2998 (2004). [doi:10.1158/0008-5472.CAN-04-0587](https://doi.org/10.1158/0008-5472.CAN-04-0587) [Medline](#)
24. T. D. Barber *et al.*, Chromatid cohesion defects may underlie chromosome instability in human colorectal cancers. *Proc. Natl. Acad. Sci. U.S.A.* **105**, 3443 (2008). [doi:10.1073/pnas.0712384105](https://doi.org/10.1073/pnas.0712384105) [Medline](#)
25. K. W. Kinzler, B. Vogelstein, Gatekeepers and caretakers. *Nature* **386**, 761, 763 (1997). [doi:10.1038/386761a0](https://doi.org/10.1038/386761a0) [Medline](#)

### Supporting References and Notes

1. A. Pandita, K. D. Aldape, G. Zadeh, A. Guha, C. D. James, Contrasting in vivo and in vitro fates of glioblastoma cell subpopulations with amplified EGFR. *Genes Chromosomes Cancer* **39**, 29 (2004). [doi:10.1002/gcc.10300](https://doi.org/10.1002/gcc.10300) [Medline](#)
2. C. Giannini *et al.*, Patient tumor EGFR and PDGFRA gene amplifications retained in an invasive intracranial xenograft model of glioblastoma multiforme. *Neuro-oncol.* **7**, 164 (2005). [doi:10.1215/S1152851704000821](https://doi.org/10.1215/S1152851704000821) [Medline](#)
3. R. G. W. Verhaak *et al.*, Integrated genomic analysis identifies clinically relevant subtypes of glioblastoma characterized by abnormalities in PDGFRA, IDH1, EGFR, and NF1. *Cancer Cell* **17**, 98 (2010). [doi:10.1016/j.ccr.2009.12.020](https://doi.org/10.1016/j.ccr.2009.12.020) [Medline](#)
4. L. H. Palavalli *et al.*, Analysis of the matrix metalloproteinase family reveals that MMP8 is often mutated in melanoma. *Nat. Genet.* **41**, 518 (2009). [doi:10.1038/ng.340](https://doi.org/10.1038/ng.340) [Medline](#)
5. H. Y. Huang *et al.*, Ewing sarcomas with p53 mutation or p16/p14ARF homozygous deletion: A highly lethal subset associated with poor chemoresponse. *J. Clin. Oncol.* **23**, 548 (2005). [doi:10.1200/JCO.2005.02.081](https://doi.org/10.1200/JCO.2005.02.081) [Medline](#)
6. D. A. Solomon *et al.*, Identification of p18 INK4c as a tumor suppressor gene in glioblastoma multiforme. *Cancer Res.* **68**, 2564 (2008). [doi:10.1158/0008-5472.CAN-07-6388](https://doi.org/10.1158/0008-5472.CAN-07-6388) [Medline](#)

7. D. A. Solomon *et al.*, Mutational inactivation of PTPRD in glioblastoma multiforme and malignant melanoma. *Cancer Res.* **68**, 10300 (2008). [doi:10.1158/0008-5472.CAN-08-3272](https://doi.org/10.1158/0008-5472.CAN-08-3272) [Medline](#)
8. D. A. Solomon *et al.*, Sample type bias in the analysis of cancer genomes. *Cancer Res.* **69**, 5630 (2009). [doi:10.1158/0008-5472.CAN-09-1055](https://doi.org/10.1158/0008-5472.CAN-09-1055) [Medline](#)
9. T. Sjöblom *et al.*, The consensus coding sequences of human breast and colorectal cancers. *Science* **314**, 268 (2006). [doi:10.1126/science.1133427](https://doi.org/10.1126/science.1133427) [Medline](#)
10. D. Douglas *et al.*, BMI-1 promotes Ewing sarcoma tumorigenicity independent of CDKN2A repression. *Cancer Res.* **68**, 6507 (2008). [doi:10.1158/0008-5472.CAN-07-6152](https://doi.org/10.1158/0008-5472.CAN-07-6152) [Medline](#)
11. J. S. Kim, C. Bonifant, F. Bunz, W. S. Lane, T. Waldman, Epitope tagging of endogenous genes in diverse human cell lines. *Nucleic Acids Res.* **36**, e127 (2008) Solomon et al. [doi:10.1093/nar/gkn566](https://doi.org/10.1093/nar/gkn566) [Medline](#)
12. J. F. Giménez-Abián, L. A. Díaz-Martínez, K. G. Wirth, Regulated separation of sister centromeres depends on the spindle assembly checkpoint but not on the anaphase promoting complex/cyclosome. *Cell Cycle* **4**, 1561 (2005). [doi:10.4161/cc.4.11.2146](https://doi.org/10.4161/cc.4.11.2146) [Medline](#)
13. T. Kanda, K. F. Sullivan, G. M. Wahl, Histone-GFP fusion protein enables sensitive analysis of chromosome dynamics in living mammalian cells. *Curr. Biol.* **8**, 377 (1998). [doi:10.1016/S0960-9822\(98\)70156-3](https://doi.org/10.1016/S0960-9822(98)70156-3) [Medline](#)
